# Supplementary material for: Environment- and epigenome-wide association study of obesity in ‘Children of 1997’ birth cohort
Source: eLife. 2023 May 19;12:e82377. doi: 10.7554/eLife.82377 (PMC10198722; doi:10.7554/eLife.82377)
Supplement: Figure 1—source data 1. [file elife-82377-fig1-data1.csv]

VarNames	Estimate	p	Bonf.sig	VarNo	BMI11annotation
bw	0.465150887	1.88E-23	1	1	birth weight
sex	0.857295222	9.37E-26	1	2	sex
sga2016a	-0.750802193	1.52E-07	1	3	small for gestational age
termbirth	-0.597963396	0.001543574	0	4
twin01	-1.046470199	0.003204535	0	5
eduf2016	-0.218845106	3.00E-05	1	6	paternal education
edufgf2016	0.10793944	0.117017438	0	7
edufgm2016	0.138034937	0.05196419	0	8
edum2016	-0.208764136	0.000338895	1	9	maternal education
edumgf2016	0.118773277	0.077100723	0	10
edumgm2016	0.207309429	0.001978306	0	11
edup2016	-0.228039286	2.97E-05	1	12	highest parental education
foccb	0.102543978	0.000784357	0	13
hkf2016	-0.154254163	0.083003822	0	14
hkfgf2016	-0.094792012	0.506320946	0	15
hkfgm2016	-0.018889604	0.884020082	0	16
hkm2016	-0.327255722	0.000114444	1	17	mother's birthplace
hkmgf2016	0.224757845	0.106568491	0	18
hkmgm2016	-0.074300983	0.552625097	0	19
hkp2016	-0.089986854	0.006106572	0	20
house	-0.073858484	0.101128584	0	21
income	-0.099024904	0.001271692	0	22
moccb	0.140598641	0.028777566	0	23
pocc	0.109680308	0.000454261	0	24
q11_b	0.157958379	0.361194521	0	25
q13	0.006731935	0.000656036	0	26
q14	0.002703786	0.19197129	0	27
q27	-0.080758896	0.141135464	0	28
q28	0.078827087	0.006157818	0	29
q29	0.277446488	1.66E-07	1	30	no. of smokers at home
q38	0.004040234	0.923242327	0	31
q42	0.130972566	0.253572863	0	32
agefc2016	-0.016987773	0.01833001	0	33
ht_fa2016	-0.016605323	0.036054083	0	34
wt_fa2016	0.047630622	7.75E-21	1	35	paternal weight
agemc2016	-0.026928274	0.001952021	0	36
birthhosp2	-0.138173984	0.139009676	0	37
deliv	0.10762774	0.02602039	0	38
gestwk2016	-0.003941855	0.87744513	0	39
ht_mo2016	-0.013458162	0.134841874	0	40
mshs	0.150165776	4.58E-05	1	41	maternal SHS
msmk	0.441787974	0.024683065	0	42
parity	-0.086735181	0.163964987	0	43
q7	0.008969384	0.465548938	0	44
smoke_hyg	0.122508312	2.38E-07	1	45	postnatal smoking hygiene
smoke_source	0.099099614	2.19E-08	1	46	SHS sources and timing
wt_mo2016	0.091098394	3.96E-54	1	47	maternal weight
DM_fa2016	0.871301308	0.000156577	1	48	paternal diabetes
DM_fgf2016	0.323952407	0.025019841	0	49
DM_fgm2016	0.229033442	0.064729073	0	50
DM_mgf2016	0.202378599	0.168835143	0	51
DM_mgm2016	0.439714594	0.000499296	0	52
DM_mo2016	1.609140929	7.90E-07	1	53	maternal diabetes
GDM2016	0.675810334	0.000135686	1	54	gestational diabetes
PE2016	0.403747496	0.052118261	0	55
bf	-0.01719872	0.797266668	0	56
q3	-0.056709304	0.801184393	0	57
q4c	0.018603817	0.740944928	0	58
q5a	-0.006824074	0.908106463	0	59
q5b	0.037465438	0.527052341	0	60
q6a	0.036997675	0.053041989	0	61
q6b	0.033850975	0.019223035	0	62
q6c	0.029541277	0.050454306	0	63
q6d	0.017082869	0.30158181	0	64
q9	0.005086316	0.924985453	0	65
q4a	-0.075423876	0.064831901	0	66
q4b	-0.069587309	0.174790614	0	67
q7a	0.120644739	0.021784016	0	68
q7b	-0.045715071	0.405117394	0	69
q7c	0.039861608	0.500129235	0	70
q7d	-0.005941555	0.902735333	0	71
q7e	0.056281355	0.306583056	0	72
q7f	0.024363799	0.734495641	0	73
q7g	0.110099256	0.043156821	0	74
q7h	0.115982998	0.074752352	0	75
q7i	-0.204315605	0.006052765	0	76
q8a	0.090669063	0.068097599	0	77
q8b	0.273973028	3.43E-05	1	78	water(freq)
q8c	-0.071453763	0.195025753	0	79
q8d	-0.008334186	0.853143786	0	80
q8e	-0.064904092	0.255214583	0	81
q8f	0.089374198	0.158118296	0	82
q8g	0.037191189	0.678266635	0	83
b2_d	0.035625613	0.725878344	0	84
q10	0.294760604	0.001561854	0	85
q9	0.020527653	0.732802516	0	86
q37a1	0.40738073	0.253791003	0	87
q37a2	-0.176685637	0.120071402	0	88
q37a3	0.038782698	0.860597232	0	89
q37a4	-0.262463404	0.206786177	0	90
q37a5	0.079858002	0.393556068	0	91
q41a1	0.288524217	0.398056097	0	92
q41a2	-0.217378064	0.038802663	0	93
q41a3	0.183421055	0.335604209	0	94
q41a4	0.132314331	0.57870287	0	95
q41a5	0.030797044	0.73184947	0	96
q11_2b	0.303930864	0.3502226	0	97
q11_2c	0.003103245	0.989143169	0	98
q11_2a	-0.374500958	0.000802265	0	99
q11_2d	0.178285243	0.010905162	0	100
q11_2e	0.391370595	0.000482873	0	101
q11_2f	0.370383746	0.005451716	0	102
q11_2g	-0.080744621	0.544337142	0	103
q11_2h	-0.14807171	0.225933448	0	104
q11_2i	0.086231344	0.664218231	0	105
q11_2j	0.14272857	0.16841023	0	106
q11_2k	0.163882703	0.088058902	0	107
q11_2l	-0.074598607	0.509011882	0	108
q11_2m	0.321951753	0.185253764	0	109
q11_2n	-0.500973317	1.72E-05	1	110	hours spent on meals
q30a1	-0.036630978	0.661963882	0	111
q30a2	0.063323447	0.930095982	0	112
q30a3	0.008721905	0.919017666	0	113
q30a4	-0.073302515	0.757846242	0	114
q30a5	0.288753919	0.293154152	0	115
q31a1	-0.269184981	0.026903993	0	116
q31a2	0.545267521	0.089197758	0	117
q31a3	0.173823743	0.360191375	0	118
q31a4	0.294332377	0.347204467	0	119
q31a5	0.306775823	0.310557796	0	120
q32	-0.179500917	0.094305334	0	121
q33	-0.06951734	0.09750666	0	122
q34	0.122936238	0.030226008	0	123
