# Supplementary material for: Environment- and epigenome-wide association study of obesity in ‘Children of 1997’ birth cohort
Source: eLife. 2023 May 19;12:e82377. doi: 10.7554/eLife.82377 (PMC10198722; doi:10.7554/eLife.82377)
Supplement: Figure 1—source data 2. [file elife-82377-fig1-data2.csv]

VarNames	Estimate	p	Bonf.sig	VarNo	WHR11annotation
bw	0.003544293	0.000889437	0	1
sex	0.054648076	6.99E-203	1	2	sex
sga2016a	0.000656154	0.843188514	0	3
termbirth	-0.012491844	0.003909597	0	4
twin01	-0.005655718	0.460224413	0	5
eduf2016	-0.007113855	2.08E-09	1	6	paternal education
edufgf2016	-0.00031227	0.833281694	0	7
edufgm2016	0.000963338	0.529542465	0	8
edum2016	-0.009713454	1.47E-13	1	9	maternal education
edumgf2016	-0.001576929	0.276224499	0	10
edumgm2016	0.000525677	0.715545259	0	11
edup2016	-0.009219511	9.64E-14	1	12	highest parental education
foccb	0.002856294	3.75E-05	1	13	father's occupation
hkf2016	-0.003889346	0.0515068	0	14
hkfgf2016	0.002400282	0.439513485	0	15
hkfgm2016	0.000533707	0.848141426	0	16
hkm2016	-0.009622565	4.67E-07	1	17	mother's birthplace
hkmgf2016	0.004659129	0.119912078	0	18
hkmgm2016	-0.003688259	0.171351273	0	19
hkp2016	-0.002484223	0.000723901	0	20
house	-0.005096977	7.34E-07	1	21	housing type at birth
income	-0.003779534	6.52E-08	1	22	income
moccb	0.003800431	0.006558608	0	23
pocc	0.003359101	2.17E-06	1	24	highest parental occupation
q11_b	-0.011643853	0.003224355	0	25
q13	0.000156386	0.000383098	1	26	year of mother in HK
q14	5.65E-05	0.231294616	0	27
q27	-0.001210801	0.332790224	0	28
q28	0.00133629	0.043180752	0	29
q29	0.005444029	1.61E-05	1	30	no. of smokers at home
q38	-0.002983252	0.001817898	0	31
q42	-0.001039432	0.6961854	0	32
agefc2016	-6.51E-05	0.697307037	0	33
ht_fa2016	-0.00024061	0.160336895	0	34
wt_fa2016	0.000219947	0.041295532	0	35
agemc2016	-0.000728405	0.00030786	1	36	maternal age when child born
birthhosp2	-0.00939159	8.90E-06	1	37	type of hospital during delivery
deliv	2.41E-05	0.982356639	0	38
gestwk2016	-0.00134495	0.022941376	0	39
ht_mo2016	-0.000382091	0.049322659	0	40
mshs	0.00230326	0.008311093	0	41
msmk	0.002432332	0.612709152	0	42
parity	-0.000328456	0.816220941	0	43
q7	-0.000393456	0.158638298	0	44
smoke_hyg	0.002085665	0.000124957	1	45	postnatal smoking hygiene
smoke_source	0.001729102	2.22E-05	1	46	SHS sources and timing
wt_mo2016	0.000707005	2.32E-08	1	47	maternal weight
DM_fa2016	0.007993428	0.112893406	0	48
DM_fgf2016	0.001006278	0.747806371	0	49
DM_fgm2016	0.006078875	0.024708421	0	50
DM_mgf2016	0.008453118	0.007653361	0	51
DM_mgm2016	0.002257843	0.415455046	0	52
DM_mo2016	0.029946747	8.72E-05	1	53	maternal diabetes
GDM2016	0.010751047	0.005063043	0	54
PE2016	-0.004052695	0.377572587	0	55
bf	-0.004029327	0.008287973	0	56
q3	-0.003985452	0.384226642	0	57
q4c	-0.001276864	0.263340467	0	58
q5a	-0.001786797	0.136926871	0	59
q5b	-0.000378311	0.752832006	0	60
q6a	0.000200764	0.60504087	0	61
q6b	0.000522731	0.075857308	0	62
q6c	0.00033248	0.279296153	0	63
q6d	5.60E-05	0.868052937	0	64
q9	0.001018812	0.409966083	0	65
q4a	-0.00118301	0.156003223	0	66
q4b	-0.002014666	0.05416679	0	67
q7a	-0.00315155	0.003317638	0	68
q7b	-0.003347972	0.002987548	0	69
q7c	-0.002637167	0.02724966	0	70
q7d	-0.001112492	0.259052432	0	71
q7e	-0.001014828	0.363240532	0	72
q7f	0.000976905	0.499668594	0	73
q7g	-0.001210594	0.27682172	0	74
q7h	0.003136879	0.018071501	0	75
q7i	-0.003796885	0.01229856	0	76
q8a	0.001369265	0.178917613	0	77
q8b	-0.001001705	0.454865798	0	78
q8c	0.000900534	0.420426133	0	79
q8d	-0.000444348	0.627738118	0	80
q8e	-0.000740654	0.520701472	0	81
q8f	0.004315406	0.00072618	0	82
q8g	0.002391168	0.179387733	0	83
b2_d	0.004630585	0.051366215	0	84
q10	-0.001413395	0.455523906	0	85
q9	-0.002797894	0.022732904	0	86
q37a1	-0.001384008	0.865858284	0	87
q37a2	-0.004631077	0.079284587	0	88
q37a3	-0.002280016	0.658708286	0	89
q37a4	-0.011789053	0.012209639	0	90
q37a5	0.00382881	0.076351052	0	91
q41a1	-0.003929301	0.618389742	0	92
q41a2	-0.005676873	0.017490073	0	93
q41a3	-0.001746796	0.694685329	0	94
q41a4	-0.001783616	0.743114064	0	95
q41a5	0.003632433	0.077753235	0	96
q11_2a	-0.007597339	0.000855233	0	97
q11_2e	0.00281739	0.21196804	0	98
q11_2g	-0.005082125	0.057890327	0	99
q11_2h	0.000654021	0.792814012	0	100
q11_2k	0.002849071	0.144966791	0	101
q11_2n	-0.018074981	1.60E-14	1	102	hours spent on meals
q30a1	-0.004720128	0.013795581	0	103
q30a2	-0.015407898	0.317348786	0	104
q30a3	0.003212511	0.100894133	0	105
q30a4	-0.003289686	0.561757463	0	106
q30a5	0.014946963	0.017664063	0	107
q31a1	-0.005285141	0.060320975	0	108
q31a2	0.022016395	0.003448132	0	109
q31a3	-0.001788081	0.679451004	0	110
q31a4	0.011769016	0.09308267	0	111
q31a5	-0.001658501	0.812945589	0	112
q32	-0.004982617	0.045649281	0	113
q33	-0.005090771	1.13E-07	1	114	no. of air-conditioning
q34	0.003370623	0.009078042	0	115
