# Supplementary material for: Environment- and epigenome-wide association study of obesity in ‘Children of 1997’ birth cohort
Source: eLife. 2023 May 19;12:e82377. doi: 10.7554/eLife.82377 (PMC10198722; doi:10.7554/eLife.82377)
Supplement: Figure 2—source data 1. [file elife-82377-fig2-data1.csv]

VarNames	Estimate	p	Bonf.sig	VarNo	BMI17annotation
bw	0.272586722	5.22E-05	1	1	birth weight
sex	0.538385292	4.09E-06	1	2	sex
sga2016a	-0.558871232	0.006548436	0	3
termbirth	-0.914188985	0.00127134	0	4
twin01	-1.973085441	6.82E-05	1	5	twin
eduf2016	-0.053902099	0.467279904	0	6
edufgf2016	-0.038758669	0.663550788	0	7
edufgm2016	-0.030262108	0.739366751	0	8
edum2016	-0.037194426	0.650814721	0	9
edumgf2016	-0.00263608	0.975887474	0	10
edumgm2016	0.182417792	0.035898581	0	11
edup2016	-0.041841446	0.590336605	0	12
foccb	0.052928983	0.220887859	0	13
hkf2016	0.181153429	0.143484573	0	14
hkfgf2016	0.371715937	0.057446563	0	15
hkfgm2016	0.198533162	0.250836471	0	16
hkm2016	-0.096065878	0.419536543	0	17
hkmgf2016	0.391841341	0.039633762	0	18
hkmgm2016	0.095102244	0.570860011	0	19
hkp2016	0.036571671	0.422536643	0	20
house	-0.078585019	0.227961557	0	21
income	-0.025459909	0.561444358	0	22
pocc	0.029380592	0.508676887	0	23
q11_b	0.54659477	0.024546392	0	24
q13	0.004244346	0.128056441	0	25
q14	-0.000692054	0.815322468	0	26
q27	-0.118483357	0.132589237	0	27
q28	0.044175388	0.289084474	0	28
q29	0.294240328	0.000188953	0	29
q38	0.079219333	0.188201263	0	30
q42	0.023295425	0.891249471	0	31
agefc2016	-0.009339165	0.365052694	0	32
ht_fa2016	-0.026183553	0.009342888	0	33
wt_fa2016	0.043987815	5.24E-12	1	34	paternal weight
agemc2016	-0.015069413	0.23595094	0	35
birthhosp2	-0.185965184	0.168524114	0	36
deliv	0.14467111	0.036958837	0	37
gestwk2016	-0.050710462	0.166144728	0	38
ht_mo2016	-0.015424537	0.180699421	0	39
mshs	0.224719365	3.42E-05	1	40	maternal SHS
msmk	0.600120997	0.055092745	0	41
parity	-0.133072916	0.132498677	0	42
q7	0.006129454	0.731658034	0	43
smoke_hyg	0.140877356	4.08E-05	1	44	postnatal smoking hygiene
smoke_source	0.098893389	0.000129784	0	45
wt_mo2016	0.091256881	1.60E-33	1	46	maternal weight
DM_fa2016	0.597362873	0.030792999	0	47
DM_fgf2016	0.214875167	0.222981231	0	48
DM_fgm2016	0.180215556	0.244443362	0	49
DM_mgf2016	0.050766913	0.778799345	0	50
DM_mgm2016	0.282917252	0.072027387	0	51
DM_mo2016	0.817832497	0.041905368	0	52
GDM2016	0.500470633	0.028454255	0	53
PE2016	0.498660238	0.0650162	0	54
bf	0.045384238	0.628472122	0	55
pd1	-0.073682076	0.60864003	0	56
pd2	-0.221151729	0.602733987	0	57
pd3	0.046729209	0.803738005	0	58
pd5	-0.079291445	0.282505902	0	59
pd711	-0.000903538	0.983142106	0	60
pd712	-0.047242373	0.323732256	0	61
pd713	-0.038595057	0.469225545	0	62
pd714	-0.062828413	0.288365635	0	63
pd715	-0.038037674	0.543411901	0	64
pd716	-0.049137231	0.44818934	0	65
pd721	0.001813093	0.234251302	0	66
pd722	0.002858442	0.245669099	0	67
pd723	0.003380412	0.161669675	0	68
pd724	6.08E-05	0.829004698	0	69
pd725	7.09E-05	0.802560812	0	70
pd726	7.06E-05	0.803126248	0	71
pd731	-7.92E-05	0.786818761	0	72
pd732	-7.87E-05	0.78539848	0	73
pd733	-7.82E-05	0.785630762	0	74
pd734	-7.71E-05	0.786387825	0	75
pd735	-7.80E-05	0.78447231	0	76
pd736	-7.73E-05	0.786327318	0	77
pd811	-0.054667703	0.460055322	0	78
pd812	-0.055142119	0.522610448	0	79
pd813	-0.010992999	0.92658853	0	80
pd814	-0.038478746	0.773850861	0	81
pe7c	-0.419664569	0.016719919	0	82
q9	0.048248309	0.521986338	0	83
a1a	0.139524512	0.006651983	0	84
a1aa	0.04830217	0.510753923	0	85
a1b	-0.001617205	0.97395244	0	86
a1bb	-0.12729399	0.147527111	0	87
a1c	0.054340612	0.330008724	0	88
a1cc	-6.90E-05	0.999419677	0	89
a1d	0.034186161	0.607751597	0	90
a1dd	-0.155449682	0.075288471	0	91
a1e	-0.031828264	0.648484067	0	92
a1ee	-0.133100848	0.136097553	0	93
a1f	0.00596294	0.938006569	0	94
a1ff	-0.275705862	0.000242933	0	95
a1g	0.175072981	0.023422464	0	96
a1gg	-0.416971979	6.77E-09	1	97	chocolate(freq)
a1h	0.14693732	0.071725609	0	98
a1hh	-0.292532086	4.51E-06	1	99	sweets(freq)
a1i	0.037623653	0.520825579	0	100
a1j	0.024011068	0.767409516	0	101
a1k	0.170331522	0.066267046	0	102
a1l	0.002592555	0.944271094	0	103
a1m	0.090150625	0.168981416	0	104
a1n	0.056974456	0.584719455	0	105
a1o	0.046281731	0.562453973	0	106
a1p	0.087296966	0.175779862	0	107
a1q	0.079819375	0.191788331	0	108
a1r	0.133212193	0.097409653	0	109
a1s	0.108111419	0.117987911	0	110
a1t	0.165569667	0.058772313	0	111
a1u	-0.204720445	0.0003424	0	112
a1v	-0.027627876	0.638683951	0	113
a1w	-0.065700317	0.355220092	0	114
a1x	-0.128129939	0.058621275	0	115
a1y	0.133328642	0.089862624	0	116
a1z	-0.113000064	0.142225848	0	117
a2a	0.138342592	0.000405581	0	118
a2aa	0.004226483	0.946172743	0	119
a2b	0.07589505	0.043964331	0	120
a2bb	-0.082148265	0.249243746	0	121
a2c	0.055288524	0.254622387	0	122
a2cc	-0.049789718	0.160747727	0	123
a2d	0.04017703	0.4065428	0	124
a2dd	-0.077887746	0.023302765	0	125
a2e	-0.008601451	0.866076447	0	126
a2ee	-0.04206108	0.210588521	0	127
a2f	-0.052254827	0.239006611	0	128
a2ff	-0.148684628	0.000195221	0	129
a2g	0.114441743	0.03141209	0	130
a2gg	-0.221208915	1.31E-06	1	131	chocolate(amount)
a2h	0.133213405	0.003853793	0	132
a2hh	-0.183385603	2.37E-06	1	133	sweets(amount)
a2i	0.132381012	0.032267411	0	134
a2ii	0.113562485	0.175310767	0	135
a2j	-0.000539554	0.990329954	0	136
a2k	0.099733521	0.088989274	0	137
a2l	-0.077081248	0.063728334	0	138
a2m	0.129316237	0.000134329	0	139
a2n	0.100399531	0.42146364	0	140
a2o	0.045200345	0.268490881	0	141
a2p	0.03197643	0.327997434	0	142
a2q	0.079523349	0.027588543	0	143
a2r	0.026405346	0.345161003	0	144
a2s	0.084696103	0.031387714	0	145
a2t	0.132045479	0.03513155	0	146
a2u	0.019844172	0.571230908	0	147
a2v	-0.024585582	0.53970378	0	148
a2w	0.014271737	0.739740059	0	149
a2x	-0.062690415	0.133169605	0	150
a2y	0.10605884	0.014961349	0	151
a2z	-0.027130044	0.55307504	0	152
a3a	0.210414811	0.000160648	0	153
a3b	-0.09409602	0.058664432	0	154
a3c	-0.043888395	0.46945055	0	155
a3d	0.006794024	0.858592981	0	156
a3e	0.02431554	0.780842858	0	157
a3f	-0.120719601	0.093151564	0	158
a3g	0.025501491	0.710619099	0	159
a3h	0.180695038	0.026282385	0	160
a3i	0.241744846	3.50E-05	1	161	Chinese tea
a3j	0.329833224	7.66E-07	1	162	coffee
a3k	0.125958589	0.209761804	0	163
a3l	0.008799891	0.923187739	0	164
a3m	-0.067026042	0.343463926	0	165
a3n	0.386193197	2.95E-06	1	166	Chinese herbal tea(freq)
a4a	0.253594309	2.23E-11	1	167	water(amount)
a4b	-0.045855162	0.174191567	0	168
a4c	0.011802789	0.732178659	0	169
a4d	0.028657866	0.655103443	0	170
a4e	0.058958639	0.235578721	0	171
a4f	-0.046421755	0.175236365	0	172
a4g	0.06735726	0.028490018	0	173
a4h	0.113543217	0.000233017	0	174
a4i	0.166617667	4.26E-08	1	175	Chinese tea(amount)
a4j	0.137005877	0.00026187	0	176
a4k	0.142134333	0.000101481	1	177	energy drink(amount)
a4l	0.009455221	0.68897934	0	178
a4m	-0.017580936	0.599334932	0	179
a4n	0.14899636	1.47E-05	1	180	Chinese herbal tea(amount)
a4o	-0.579473643	3.32E-26	1	181	skim milk
a4p	-0.416551494	5.41E-10	1	182	low-sugar soy milk
a4q	-0.569850484	1.79E-15	1	183	ASB
g105	-0.835315453	4.60E-08	1	184	eat before sleep
g106	-0.44945294	0.100696955	0	185
pd91	-0.166631201	0.24675393	0	186
pd95	0.358320019	0.087983451	0	187
pd961	-0.018094956	0.827123835	0	188
pd962	-0.06990718	0.431089897	0	189
pd963	0.005849018	0.950571277	0	190
pd964	0.019092076	0.853316786	0	191
pd965	0.016861242	0.876773331	0	192
pd966	0.010775899	0.923490374	0	193
h1	-0.277819809	0.073692634	0	194
h3	-0.396673268	0.10953332	0	195
h5	0.2396487	0.04903392	0	196
h7	-0.098343099	0.444605396	0	197
h8	0.005379298	0.881904027	0	198
h9	-0.036470207	0.91444489	0	199
b2_d	0.298681219	0.047876944	0	200
c1	-0.003020572	0.968392483	0	201
c2a	-0.012340266	0.834817291	0	202
c2b	0.52350697	0.009341751	0	203
c2c	0.035998253	0.833166128	0	204
c2d	-0.028048829	0.653070715	0	205
c2e	0.000923774	0.989306852	0	206
c2f	0.096807503	0.093473534	0	207
c2g	0.062815538	0.306828149	0	208
c2h	0.101113909	0.155980037	0	209
c2i	-0.121729664	0.098704458	0	210
c2j	-0.174988774	0.011036956	0	211
c2k	0.064643322	0.360356345	0	212
c2l	0.116164467	0.089751602	0	213
j6	0.602114023	0.004010714	0	214
j7	0.183586444	0.249691328	0	215
j8	0.183543574	0.27154038	0	216
pa1	-0.296704408	0.005994466	0	217
pa10a	1.183054706	0.129578309	0	218
pa11a	-0.059567427	0.731837676	0	219
pa12a	2.383805318	0	1	220	parents' perspective on child's weight
pa2a	0.004675854	0.973267407	0	221
pa2b	-1.044423353	0.005901158	0	222
pa2c	-0.842718088	1.78E-10	1	223	snoring
pa2d	-0.011202028	0.984294804	0	224
pa2e	0.332012319	0.060168472	0	225
pa2f	-0.111058493	0.720203083	0	226
pa2g	0.021344783	0.911035727	0	227
pa2h	0.090399222	0.75532325	0	228
pa2i	-0.385480693	0.029684519	0	229
pa2j	0.242762798	0.134701202	0	230
pa2k	-0.246233395	0.504559563	0	231
pa2l	0.305258233	0.27683854	0	232
pa2m	0.298309557	0.270738441	0	233
pa2n	-0.006859648	0.981747644	0	234
pa2o	0.071469977	0.849491557	0	235
pa2p	0.015752715	0.936865265	0	236
pa2q	0.256498361	0.463981755	0	237
pa3a	0.36227272	0.000904004	0	238
pa3aa	0.002471036	0.973928909	0	239
pa3b	0.016299697	0.787112686	0	240
pa3bb	0.043356642	0.594499641	0	241
pa3c	-0.017499428	0.873926321	0	242
pa3cc	0.160093426	0.096417915	0	243
pa3d	-0.003282538	0.964844392	0	244
pa3e	0.163162203	0.121961992	0	245
pa3ee	0.015973931	0.859145084	0	246
pa3f	0.159863205	0.04192272	0	247
pa3ff	0.152085701	0.382257998	0	248
pa3g	0.300860124	8.76E-07	1	249	growth problem
pa3h	0.344977204	3.40E-05	1	250	diabetes
pa3i	0.181989934	0.032107969	0	251
pa3j	-0.053022153	0.494903887	0	252
pa3k	0.054210922	0.614642959	0	253
pa3l	0.014893434	0.863751354	0	254
pa3m	0.051139624	0.565685729	0	255
pa3n	0.229762543	0.134071189	0	256
pa3o	0.310740108	0.070602781	0	257
pa3p	0.434946321	0.03161893	0	258
pa3q	0.159144946	0.271329138	0	259
pa3r	0.024574209	0.729515469	0	260
pa3s	0.149310143	0.242961407	0	261
pa3t	0.172146582	0.071881589	0	262
pa3u	-0.014243324	0.845730126	0	263
pa3v	0.210993557	0.050357064	0	264
pa3w	0.127897847	0.203963417	0	265
pa3x	0.101562996	0.421676831	0	266
pa3y	0.121240288	0.138438026	0	267
pa3z	-0.012163536	0.885565779	0	268
pa4a	-0.010546426	0.958796954	0	269
pa4d	-0.122536551	0.42223993	0	270
pa5a	0.19625179	0.130882242	0	271
pa6a	0.225169924	0.188939523	0	272
pa6b	0.307492849	0.011881537	0	273
pa7a	0.056628331	0.641105894	0	274
pa7b	0.239911693	0.321142964	0	275
pa8a	0.410680314	0.024497969	0	276
pa8b	0.114093254	0.644764337	0	277
pa8c	0.120225467	0.651081108	0	278
pa9a	0.550943861	0.095410594	0	279
pa9c	-0.163101155	0.655064226	0	280
q37a1	1.082706922	0.032276298	0	281
q37a2	-0.070128379	0.659950467	0	282
q37a3	0.109796063	0.727696316	0	283
q37a4	-0.096670047	0.743312607	0	284
q37a5	0.00445936	0.973299589	0	285
q41a1	0.183102751	0.699073017	0	286
q41a2	-0.241802033	0.101974927	0	287
q41a3	0.27731427	0.291265494	0	288
q41a4	0.645848121	0.068764753	0	289
q41a5	0.057843143	0.652639468	0	290
b10	0.095054375	0.609791527	0	291
b1a	0.220950675	0.094036887	0	292
b1b	0.309681024	2.41E-06	1	293	play ball games
b1c	0.444912259	0.000162192	0	294
b1d	-0.101943785	0.43688131	0	295
b1e	0.052849518	0.481031305	0	296
b1f	0.276171968	0.016699516	0	297
b1g	0.458152406	0.058349075	0	298
b1h	-0.015077273	0.948570753	0	299
b1i	0.029394342	0.524580723	0	300
b1j	0.42977782	1.01E-05	1	301	do gym
b2	0.061616053	0.098690333	0	302
b3	0.163479646	0.011157548	0	303
b4	0.373829729	2.69E-06	1	304	lunchtime PA
b5	0.150253598	0.00695065	0	305
b6	0.237513977	5.54E-05	1	306	do sports at night
b7	0.175584614	0.000874721	0	307
b8	0.220277246	0.0001686	0	308
b9fri	0.154514848	0.003019758	0	309
b9mon	0.166532364	0.003463521	0	310
b9sat	0.190907123	0.000270055	0	311
b9sun	0.136976948	0.016641394	0	312
b9thur	0.250767947	2.79E-06	1	313	PA on Thur
b9tue	0.224238366	4.97E-05	1	314	PA on Tue
b9wed	0.148168127	0.008354093	0	315
d1a	0.057286856	0.576306157	0	316
d1b	0.140725675	0.168219068	0	317
d1c	-0.121033213	0.185820271	0	318
d1d	-0.070399897	0.474527735	0	319
d1e	-0.062469077	0.192408489	0	320
d1f	-0.01777914	0.903115607	0	321
d1g	-0.022416519	0.807908772	0	322
d1h	0.117350714	0.377198319	0	323
d1i	-0.012261196	0.935758626	0	324
d1j	0.119236777	0.224037568	0	325
d1k	0.193110866	0.15151822	0	326
d1l	0.145229945	0.126157534	0	327
d1m	0.087148101	0.52724421	0	328
d2a	0.00986542	0.908647868	0	329
d2b	-0.056532971	0.536183535	0	330
d2c	-0.013908027	0.837914703	0	331
d2d	-0.08244907	0.24881088	0	332
d2e	0.010090066	0.901618947	0	333
d2f	0.044065465	0.606829751	0	334
d2g	-0.091893247	0.296516592	0	335
d2h	-0.162989324	0.12215124	0	336
d2i	0.414546406	0.009406366	0	337
d2j	-0.061750377	0.56910102	0	338
d3a	0.01883854	0.607695988	0	339
d3b	0.006229405	0.86287846	0	340
d3c	0.010244057	0.78185863	0	341
d3d	-0.010094522	0.78995724	0	342
d3e	0.033662714	0.331133574	0	343
d3f	-0.007194439	0.844073206	0	344
d3g	-0.00030708	0.993486653	0	345
d3h	-0.017711768	0.613409885	0	346
d3i	-0.00232799	0.947135065	0	347
d3j	0.017599599	0.624414058	0	348
d3k	-0.008856122	0.811097483	0	349
d3l	-0.02943359	0.406665745	0	350
d3m	-0.020436361	0.576276423	0	351
d3n	-0.000632387	0.985853191	0	352
d3o	0.002731662	0.942027721	0	353
d3p	-0.006956805	0.850184138	0	354
d3q	0.015556762	0.685175274	0	355
d3r	0.008778976	0.805881111	0	356
d3s	0.005684257	0.880603247	0	357
d3t	0.010854006	0.770757698	0	358
d3u	0.023868046	0.528719937	0	359
pb1a	0.225392557	0.023537668	0	360
pb1b	0.264641702	0.003235872	0	361
pb1c	0.178624776	0.055782595	0	362
pb1d	0.176321797	0.073502327	0	363
pb1e	0.108972923	0.264158385	0	364
pb1f	0.218237902	0.023889944	0	365
pb1g	0.091506428	0.330051595	0	366
pb1h	0.069871987	0.438403101	0	367
pb1i	-0.00767658	0.939709411	0	368
pb1j	0.002130171	0.982609759	0	369
pc1a	-0.233693411	0.257076413	0	370
pc1b	0.025035264	0.872175298	0	371
pc1c	0.247339688	0.335571054	0	372
pc1d	-0.156279412	0.622410514	0	373
pc1e	0.144545497	0.318164841	0	374
pc1f	0.008633961	0.949956445	0	375
pc1g	0.066658715	0.579512093	0	376
pc1h	0.040132496	0.761072343	0	377
pc2a	3.211838226	2.48E-17	1	378	eat binges
pc2b	-0.246516299	0.688113902	0	379
pc2c	-0.162543613	0.918599937	0	380
pc2d	0.527459429	0.074664716	0	381
pc2e	0.364827061	0.050050767	0	382
pc2f	-0.094878136	0.691686778	0	383
pc2g	0.383191954	0.225000153	0	384
pc2h	0.809512902	0.032126864	0	385
pc3a	-0.363206697	0.012119262	0	386
pc3b	-0.0787377	0.593106179	0	387
pc3c	0.008195267	0.944122532	0	388
pc3d	0.047998517	0.759862052	0	389
pc3e	-0.234299691	0.20275443	0	390
pc3f	-0.16720262	0.516234055	0	391
pc3g	-0.190034083	0.147189083	0	392
pc3h	-0.497039891	0.103500322	0	393
pc3i	0.141562244	0.734396393	0	394
pc3j	0.013186552	0.941817855	0	395
pc3k	0.15786954	0.49683545	0	396
pc3l	-0.196924376	0.200842274	0	397
pc3m	-0.117448755	0.617410438	0	398
e10	0.125744349	0.022370144	0	399
e2	-0.039885018	0.251022893	0	400
e9	0.115182541	0.015660451	0	401
g101	0.076301889	0.52865149	0	402
g1010	0.029752165	0.865630108	0	403
g102	0.02602203	0.851120019	0	404
g103	0.192045948	0.104341416	0	405
g104	0.218287775	0.067918762	0	406
g107	-0.173784034	0.247411049	0	407
g108	-0.420757159	0.174136996	0	408
g109	-0.040295818	0.831678012	0	409
g5a	-0.170852732	0.005040618	0	410
g5b	-0.057135788	0.388724459	0	411
g5c	-0.030874878	0.479456608	0	412
g5d	0.046317906	0.693010781	0	413
g5e	0.724933966	1.89E-18	1	414	cough or snore loudly
g5f	-0.175898428	0.017673888	0	415
g5g	0.126334409	0.054896101	0	416
g5h	-0.333421966	2.94E-05	1	417	had bad dreams
g5i	0.086047621	0.417795416	0	418
g5j	-0.076110662	0.534278844	0	419
g6	-0.008458847	0.869756861	0	420
g7	-0.065379335	0.512061779	0	421
g8	-0.064022566	0.148916578	0	422
g9	-0.108458361	0.173244517	0	423
pa3dd	0.270531782	0.001019133	0	424
age_period	-0.821708903	7.07E-33	1	425	girls' pubertal age
age_tanner2	-0.1764742	0.000283003	0	426
bvoice_age	-0.233734295	0.002823171	0	427
pubar_t2age	-0.407692527	6.46E-08	1	428	pubic hair onset age
q30a1	0.068641638	0.568285034	0	429
q30a2	-0.588357471	0.562885147	0	430
q30a3	-0.048053723	0.695627704	0	431
q30a4	-0.125124709	0.701567561	0	432
q30a5	0.253283184	0.511742568	0	433
q31a1	-0.096056021	0.591346053	0	434
q31a2	0.424841696	0.387130126	0	435
q31a3	0.144996357	0.592719558	0	436
q31a4	0.549373121	0.215471978	0	437
q31a5	0.29008547	0.516363998	0	438
q32	-0.126909435	0.425450029	0	439
q33	0.036679456	0.542809115	0	440
q34	0.111424042	0.169591723	0	441
