# Supplementary material for: Environment- and epigenome-wide association study of obesity in ‘Children of 1997’ birth cohort
Source: eLife. 2023 May 19;12:e82377. doi: 10.7554/eLife.82377 (PMC10198722; doi:10.7554/eLife.82377)
Supplement: Figure 2—source data 2. [file elife-82377-fig2-data2.csv]

VarNames	Estimate	p	Bonf.sig	VarNo	WHR17annotation
bw	0.00262554	0.032206767	0	1
sex	0.044955024	8.45E-106	1	2	sex
sga2016a	-0.00878995	0.018823808	0	3
termbirth	-0.017216736	0.000858717	0	4
twin01	0.003687504	0.685144681	0	5
eduf2016	-0.000760268	0.572741112	0	6
edufgf2016	0.0011537	0.470136179	0	7
edufgm2016	0.001357627	0.419344267	0	8
edum2016	-0.001459257	0.328402457	0	9
edumgf2016	0.000652948	0.681409122	0	10
edumgm2016	0.001178664	0.460402919	0	11
edup2016	-0.000992421	0.482171041	0	12
foccb	0.000538947	0.498116909	0	13
hkf2016	0.002677716	0.23412906	0	14
hkfgf2016	-0.000409864	0.908757934	0	15
hkfgm2016	-0.001334575	0.672990453	0	16
hkm2016	-0.004756045	0.027806499	0	17
hkmgf2016	0.000741148	0.829533882	0	18
hkmgm2016	-0.002055237	0.499829595	0	19
hkp2016	1.11E-05	0.98930587	0	20
house	-0.000858223	0.469698827	0	21
income	-8.69E-05	0.9132613	0	22
pocc	0.000715683	0.381624096	0	23
q11_b	0.000539376	0.903360778	0	24
q13	5.71E-05	0.253728214	0	25
q14	-1.64E-05	0.762776242	0	26
q27	0.001337412	0.35156532	0	27
q28	0.000230051	0.761748231	0	28
q29	0.00218166	0.12864519	0	29
q38	0.000775149	0.479150311	0	30
q42	0.001682012	0.586742144	0	31
agefc2016	0.000128144	0.494239121	0	32
ht_fa2016	-0.00040935	0.028664845	0	33
wt_fa2016	0.000163437	0.170792567	0	34
agemc2016	0.000178557	0.439739126	0	35
birthhosp2	-0.001315282	0.592480133	0	36
deliv	0.003160594	0.012241659	0	37
gestwk2016	-0.002362143	0.00038811	0	38
ht_mo2016	-0.000333308	0.115982792	0	39
mshs	0.003041612	0.002121774	0	40
msmk	0.006675425	0.23968685	0	41
parity	-0.001098689	0.494629465	0	42
q7	0.000271067	0.403646115	0	43
smoke_hyg	0.001205258	0.053493171	0	44
smoke_source	0.000883216	0.06033726	0	45
wt_mo2016	0.000692453	7.04E-07	1	46	maternal weight
DM_fa2016	0.009723546	0.056012693	0	47
DM_fgf2016	0.002917519	0.36850145	0	48
DM_fgm2016	0.003105606	0.285251698	0	49
DM_mgf2016	0.002730634	0.415620396	0	50
DM_mgm2016	0.002030433	0.485923413	0	51
DM_mo2016	0.013142329	0.074468681	0	52
GDM2016	0.007149608	0.086791421	0	53
PE2016	0.001268108	0.797739611	0	54
bf	-0.003385195	0.04710138	0	55
pd1	-0.003197974	0.231671305	0	56
pd2	0.006164214	0.434457307	0	57
pd3	0.003713735	0.291129785	0	58
pd5	-5.23E-05	0.969696269	0	59
pd711	0.001173649	0.140754167	0	60
pd712	0.002029719	0.025227616	0	61
pd713	0.002249613	0.02582198	0	62
pd714	0.001794897	0.110134176	0	63
pd715	0.001817251	0.126613587	0	64
pd716	0.001867053	0.129847558	0	65
pd721	4.36E-06	0.869884951	0	66
pd722	5.63E-05	0.229447559	0	67
pd723	9.27E-05	0.043828814	0	68
pd724	2.00E-06	0.709644147	0	69
pd725	1.92E-06	0.722373733	0	70
pd726	1.81E-06	0.737608013	0	71
pd731	4.57E-06	0.348682026	0	72
pd732	4.54E-06	0.395104909	0	73
pd733	4.61E-06	0.385080349	0	74
pd734	4.64E-06	0.380243881	0	75
pd735	4.62E-06	0.381911064	0	76
pd736	4.66E-06	0.374560245	0	77
pd811	0.002168505	0.116491718	0	78
pd812	0.001997447	0.218704007	0	79
pd813	0.000683641	0.761243408	0	80
pd814	0.001804329	0.474511977	0	81
pe7c	-0.002262332	0.492549001	0	82
q9	-0.002086678	0.128003607	0	83
a1a	-0.000243038	0.795844491	0	84
a1aa	-0.00195494	0.144850439	0	85
a1b	-0.00199786	0.027081801	0	86
a1bb	-0.005634663	0.000439468	0	87
a1c	-0.001181631	0.245989062	0	88
a1cc	-0.006990697	5.31E-05	1	89	cereals(freq)
a1d	-0.002456344	0.04312503	0	90
a1dd	-0.001302027	0.414962234	0	91
a1e	-0.001719399	0.177056702	0	92
a1ee	-0.00199304	0.221343566	0	93
a1f	-0.001869723	0.181846931	0	94
a1ff	-0.005650855	3.83E-05	1	95	biscuits(freq)
a1g	0.001536602	0.275848905	0	96
a1gg	-0.005091949	0.00011138	1	97	chocolate(freq)
a1h	0.001094563	0.462064429	0	98
a1hh	-0.005674918	1.14E-06	1	99	sweets(freq)
a1i	0.000500709	0.640123608	0	100
a1j	-8.71E-05	0.953126556	0	101
a1k	-0.003333366	0.049064145	0	102
a1l	-0.000405777	0.548799433	0	103
a1m	-0.000424982	0.722288031	0	104
a1n	0.003526457	0.063702561	0	105
a1o	0.001869167	0.200832567	0	106
a1p	0.001249245	0.288374164	0	107
a1q	0.003066539	0.005993059	0	108
a1r	0.00413134	0.004873725	0	109
a1s	0.00314668	0.012924918	0	110
a1t	0.001760331	0.271378374	0	111
a1u	0.003212983	0.002112304	0	112
a1v	0.000317816	0.766583845	0	113
a1w	0.001688604	0.193447323	0	114
a1x	-0.000499495	0.686748737	0	115
a1y	0.00333614	0.020104723	0	116
a1z	-0.001233146	0.380922811	0	117
a2a	-0.001072564	0.133600676	0	118
a2aa	-0.001514585	0.185407545	0	119
a2b	-0.001303793	0.058004578	0	120
a2bb	-0.002983311	0.021831882	0	121
a2c	-0.00121988	0.168668108	0	122
a2cc	-0.001599252	0.013495251	0	123
a2d	-0.001216857	0.169336112	0	124
a2dd	-0.000365088	0.560874878	0	125
a2e	-0.001961744	0.035427273	0	126
a2ee	-0.000299171	0.625810879	0	127
a2f	-0.002231155	0.005871202	0	128
a2ff	-0.002683841	0.000237474	0	129
a2g	-0.000136853	0.887762652	0	130
a2gg	-0.004117315	8.46E-07	1	131	chocolate(amount)
a2h	0.000914113	0.278651026	0	132
a2hh	-0.002741982	0.000115491	0	133
a2i	0.000845266	0.454344649	0	134
a2ii	-0.005286043	0.000543774	0	135
a2j	-0.000720177	0.377254552	0	136
a2k	-0.002526906	0.018416984	0	137
a2l	-0.001884331	0.013076314	0	138
a2m	0.000560707	0.36509242	0	139
a2n	0.002405178	0.293047299	0	140
a2o	0.00021623	0.772114267	0	141
a2p	0.000552838	0.35508303	0	142
a2q	0.002431985	0.000225569	0	143
a2r	0.000926435	0.069646523	0	144
a2s	0.001760456	0.014285447	0	145
a2t	0.001459373	0.202815463	0	146
a2u	0.00227469	0.000374282	0	147
a2v	-0.000206161	0.778385821	0	148
a2w	0.001432586	0.067873482	0	149
a2x	-5.56E-05	0.941901229	0	150
a2y	0.002038258	0.010400136	0	151
a2z	-0.000423135	0.612343254	0	152
a3a	0.000670993	0.511713801	0	153
a3b	-0.001375441	0.130041889	0	154
a3c	0.000265709	0.810848915	0	155
a3d	-0.00053688	0.441940492	0	156
a3e	-0.003346981	0.035994885	0	157
a3f	-0.000489609	0.708863309	0	158
a3g	0.005473035	1.27E-05	1	159	soft drinks(freq)
a3h	0.00395948	0.007687361	0	160
a3i	0.00286694	0.007248166	0	161
a3j	0.002943041	0.015824963	0	162
a3k	0.004069292	0.027011082	0	163
a3l	-0.001768408	0.289156002	0	164
a3m	0.00132129	0.306498346	0	165
a3n	0.005953254	7.99E-05	1	166	Chinese herbal tea(freq)
a4a	0.002320902	0.000842193	0	167
a4b	-0.001433999	0.019855508	0	168
a4c	0.000916983	0.145471458	0	169
a4d	-0.001297667	0.268814336	0	170
a4e	-0.000538437	0.552372618	0	171
a4f	-0.000306061	0.624419952	0	172
a4g	0.003412943	1.12E-09	1	173	soft drinks(amount)
a4h	0.002389059	2.27E-05	1	174	sport drinks
a4i	0.001748867	0.001651373	0	175
a4j	0.000986137	0.15055931	0	176
a4k	0.000803446	0.228995869	0	177
a4l	-0.000129682	0.763594026	0	178
a4m	0.000811007	0.184424432	0	179
a4n	0.002421803	0.000114058	0	180
a4o	-0.002577878	0.010478138	0	181
a4p	-0.002640401	0.031411856	0	182
a4q	-0.007278498	2.83E-08	1	183	ASB
g105	-0.003153501	0.259708482	0	184
g106	-0.003774929	0.450002985	0	185
pd91	-0.003705415	0.16895994	0	186
pd95	0.00134587	0.731907841	0	187
pd961	-0.001790321	0.258594722	0	188
pd962	-0.002436074	0.150347763	0	189
pd963	-0.000996444	0.57931326	0	190
pd964	-0.002165462	0.274652445	0	191
pd965	-0.002620778	0.208367223	0	192
pd966	-0.0025384	0.238548147	0	193
h1	-0.006871467	0.015409233	0	194
h3	-0.004474169	0.320883332	0	195
h5	0.000359411	0.871518719	0	196
h7	-0.002989531	0.20544918	0	197
h8	-0.000404758	0.531905267	0	198
h9	-0.005765153	0.35093565	0	199
b2_d	0.006070798	0.033457763	0	200
c1	0.000527662	0.704799605	0	201
c2a	0.000736877	0.495203858	0	202
c2b	0.002410314	0.512291597	0	203
c2c	0.005726329	0.066406319	0	204
c2d	0.000495861	0.66268834	0	205
c2e	-0.000545141	0.663939298	0	206
c2f	0.002373766	0.024115803	0	207
c2g	0.000637036	0.569769636	0	208
c2h	-0.000957784	0.463123144	0	209
c2i	-0.001625078	0.227302471	0	210
c2j	-0.002612768	0.037545792	0	211
c2k	0.000587777	0.648789945	0	212
c2l	4.48E-05	0.971411306	0	213
j6	0.009295222	0.012555569	0	214
j7	-0.002457965	0.386724087	0	215
j8	0.003148936	0.289325262	0	216
pa1	0.000786003	0.696282488	0	217
pa10a	0.036664441	0.011518658	0	218
pa11a	0.007459018	0.021112562	0	219
pa12a	0.016706819	1.48E-39	1	220	parents' perspective on child's weight
pa2a	0.002988223	0.249472044	0	221
pa2b	-0.00363242	0.606838131	0	222
pa2c	-0.009406119	0.000136373	0	223
pa2d	0.007733627	0.465448013	0	224
pa2e	0.007304793	0.026365237	0	225
pa2f	-0.00073061	0.899313836	0	226
pa2g	0.004423333	0.214145634	0	227
pa2h	0.003286232	0.543358923	0	228
pa2i	-0.000624902	0.850195207	0	229
pa2j	0.00484766	0.109857503	0	230
pa2k	0.001435233	0.834618267	0	231
pa2l	0.007030995	0.178898946	0	232
pa2m	0.004477156	0.375252365	0	233
pa2n	-0.005167621	0.355287423	0	234
pa2o	0.000475836	0.945885203	0	235
pa2p	-0.003200926	0.388653224	0	236
pa2q	0.007878694	0.227043197	0	237
pa3a	0.006176692	0.002374138	0	238
pa3aa	-0.000905124	0.523530811	0	239
pa3b	0.001736876	0.12178656	0	240
pa3bb	0.002402932	0.113225652	0	241
pa3c	0.001881041	0.359445015	0	242
pa3cc	0.00278568	0.120299143	0	243
pa3d	0.001921401	0.164591553	0	244
pa3e	0.004376213	0.025780121	0	245
pa3ee	-0.002333165	0.164120264	0	246
pa3f	0.001485947	0.309559623	0	247
pa3ff	0.004236435	0.191130713	0	248
pa3g	0.004443138	0.000113462	0	249
pa3h	0.003781573	0.015024119	0	250
pa3i	0.002573155	0.104521721	0	251
pa3j	0.000802562	0.579029542	0	252
pa3k	0.002345678	0.242091797	0	253
pa3l	0.000467604	0.772323487	0	254
pa3m	0.003529713	0.032885916	0	255
pa3n	0.006369671	0.026191165	0	256
pa3o	0.0040193	0.208992822	0	257
pa3p	0.003760427	0.318327586	0	258
pa3q	0.008736731	0.001162745	0	259
pa3r	0.001326755	0.31627455	0	260
pa3s	0.003628142	0.128277076	0	261
pa3t	0.003189541	0.072932988	0	262
pa3u	-0.000462052	0.73550421	0	263
pa3v	0.005477257	0.006312515	0	264
pa3w	0.001557113	0.405767193	0	265
pa3x	0.001088981	0.644172959	0	266
pa3y	-0.000122857	0.935781099	0	267
pa3z	0.000747854	0.634801075	0	268
pa4a	0.000437516	0.908445274	0	269
pa4d	0.000753433	0.790175707	0	270
pa5a	0.00975903	5.53E-05	1	271	musculoskeletal pain
pa6a	0.000544319	0.864443181	0	272
pa6b	0.002139783	0.351122837	0	273
pa7a	-0.000818824	0.717387522	0	274
pa7b	-0.006957987	0.108906426	0	275
pa8a	0.003244306	0.339641182	0	276
pa8b	0.005079982	0.271060012	0	277
pa8c	-0.011873838	0.017078527	0	278
pa9a	0.001662165	0.787000474	0	279
pa9c	-0.006008952	0.377390737	0	280
q37a1	0.010150357	0.269123469	0	281
q37a2	0.00216204	0.455401465	0	282
q37a3	0.013985894	0.014546475	0	283
q37a4	0.003300971	0.538027382	0	284
q37a5	-0.002321547	0.337472529	0	285
q41a1	0.004922008	0.567142019	0	286
q41a2	-0.001475976	0.582401683	0	287
q41a3	-0.000761378	0.873549614	0	288
q41a4	0.006120528	0.342293571	0	289
q41a5	0.000848955	0.716058818	0	290
b10	0.002545115	0.455212369	0	291
b1a	-0.00769693	0.001411581	0	292
b1b	0.006521342	5.29E-08	1	293	play ball games
b1c	0.005640499	0.008895178	0	294
b1d	-0.009933924	3.34E-05	1	295	dance
b1e	0.001440435	0.29261214	0	296
b1f	0.003199169	0.129181964	0	297
b1g	0.006289552	0.154247257	0	298
b1h	-0.006291561	0.14162714	0	299
b1i	-0.00127801	0.12958154	0	300
b1j	0.006345271	0.00035594	0	301
b2	-0.001014903	0.136684257	0	302
b3	0.000276617	0.814036517	0	303
b4	0.002912837	0.045083106	0	304
b5	0.00315999	0.001846813	0	305
b6	0.003391941	0.001583406	0	306
b7	0.002283539	0.017772066	0	307
b8	0.003812025	0.000354725	0	308
b9fri	0.001658102	0.081858089	0	309
b9mon	0.002483862	0.017073252	0	310
b9sat	0.002042967	0.033102623	0	311
b9sun	0.002750475	0.008773557	0	312
b9thur	0.002078123	0.033701413	0	313
b9tue	0.002703058	0.007488138	0	314
b9wed	0.002239318	0.028705531	0	315
d1a	-0.001175518	0.529937473	0	316
d1b	-0.002176633	0.242834001	0	317
d1c	-0.004404074	0.008350955	0	318
d1d	-0.002992181	0.095970873	0	319
d1e	-0.000652675	0.455591822	0	320
d1f	-0.009861562	0.000220599	0	321
d1g	-0.003543635	0.035114266	0	322
d1h	-0.001305279	0.590269473	0	323
d1i	0.000257515	0.926101317	0	324
d1j	0.001892669	0.290203109	0	325
d1k	0.004113963	0.093958824	0	326
d1l	-0.002325367	0.179601523	0	327
d1m	-0.000535155	0.831529525	0	328
d2a	-0.000769941	0.624256684	0	329
d2b	-0.002321424	0.163904749	0	330
d2c	-0.001384276	0.265396393	0	331
d2d	-0.002705549	0.038419622	0	332
d2e	-0.000109974	0.941201692	0	333
d2f	0.00118618	0.448086722	0	334
d2g	-0.003173364	0.047972626	0	335
d2h	-0.002495452	0.195170125	0	336
d2i	0.004421854	0.129186599	0	337
d2j	-0.000440778	0.825067045	0	338
d3a	-0.000478318	0.476033288	0	339
d3b	-0.000345071	0.60052585	0	340
d3c	-0.000650714	0.335382517	0	341
d3d	-0.001014324	0.142647666	0	342
d3e	-0.000586665	0.353674385	0	343
d3f	-0.000606477	0.363822905	0	344
d3g	-0.000525866	0.443897731	0	345
d3h	-0.001000682	0.117918861	0	346
d3i	-0.000365187	0.568967399	0	347
d3j	-0.000684035	0.297212632	0	348
d3k	-0.001057221	0.11804547	0	349
d3l	-0.000827991	0.201134018	0	350
d3m	-0.00106663	0.110184169	0	351
d3n	-0.000494329	0.447772256	0	352
d3o	-0.000939479	0.170732819	0	353
d3p	-0.000597697	0.374343194	0	354
d3q	-0.000371359	0.596039411	0	355
d3r	-0.000884753	0.174929562	0	356
d3s	-0.000546771	0.428678384	0	357
d3t	-0.000593677	0.38335632	0	358
d3u	-0.000383225	0.579583491	0	359
pb1a	-0.003498035	0.060005589	0	360
pb1b	-0.001337189	0.426238164	0	361
pb1c	-0.00107519	0.537971146	0	362
pb1d	-0.00321965	0.080435766	0	363
pb1e	-0.00462945	0.011141003	0	364
pb1f	-0.002483414	0.167948337	0	365
pb1g	-0.004127708	0.018650222	0	366
pb1h	-0.001761296	0.295236114	0	367
pb1i	-0.005130567	0.00678754	0	368
pb1j	-0.004146823	0.023214331	0	369
pc1a	-0.000521666	0.891735668	0	370
pc1b	0.003089345	0.285627519	0	371
pc1c	0.007439524	0.118930166	0	372
pc1d	0.001127869	0.848060685	0	373
pc1e	0.009444834	0.000449076	0	374
pc1f	-0.001890085	0.459707864	0	375
pc1g	0.002599525	0.245592826	0	376
pc1h	0.003761978	0.124737191	0	377
pc2a	0.023312895	0.001031285	0	378
pc2b	0.012646077	0.268789978	0	379
pc2c	0.038627962	0.192473307	0	380
pc2d	0.001106589	0.840659901	0	381
pc2e	0.000223538	0.948603853	0	382
pc2f	0.001664314	0.708678244	0	383
pc2g	0.003603807	0.539981458	0	384
pc2h	0.020070092	0.004309465	0	385
pc3a	-0.003420521	0.205475298	0	386
pc3b	-0.001054491	0.700803648	0	387
pc3c	0.002859845	0.189250726	0	388
pc3d	0.000541574	0.853340587	0	389
pc3e	-0.000894123	0.794468033	0	390
pc3f	0.005945366	0.21678407	0	391
pc3g	-0.001029458	0.674047388	0	392
pc3h	0.001085365	0.848550959	0	393
pc3i	0.009371629	0.227718155	0	394
pc3j	0.002205701	0.511357634	0	395
pc3k	0.004571213	0.290521189	0	396
pc3l	0.000811966	0.776941911	0	397
pc3m	0.002063973	0.637209163	0	398
e10	0.000501248	0.618291379	0	399
e2	-0.001117687	0.079067511	0	400
e9	0.001325474	0.128087297	0	401
g101	-0.001989141	0.368260968	0	402
g1010	-0.007478067	0.019958408	0	403
g102	-0.002186497	0.387501685	0	404
g103	-0.001738439	0.420692937	0	405
g104	0.001890534	0.386656597	0	406
g107	-0.003156541	0.249922438	0	407
g108	-0.003000446	0.595392917	0	408
g109	-0.001929147	0.577098872	0	409
g5a	-0.000612745	0.581866776	0	410
g5b	-0.000803	0.507263224	0	411
g5c	-0.000369103	0.643454359	0	412
g5d	-0.001328135	0.535062384	0	413
g5e	0.00878405	6.82E-09	1	414	cough or snore loudly
g5f	-0.001952952	0.149069416	0	415
g5g	0.000193886	0.871866464	0	416
g5h	-0.005052694	0.000521011	0	417
g5i	0.000190767	0.921633571	0	418
g5j	-0.000382075	0.865320661	0	419
g6	-0.000432263	0.646285767	0	420
g7	0.000559489	0.759309579	0	421
g8	-0.001505847	0.06299665	0	422
g9	-0.001609474	0.269463083	0	423
pa3dd	0.0061318	6.19E-05	1	424	sleep disturbance
age_period	-0.004099741	0.000328158	0	425
age_tanner2	0.003432521	8.20E-05	1	426	age of onset of puberty
bvoice_age	-0.001496222	0.292986681	0	427
pubar_t2age	0.002035427	0.146422884	0	428
q30a1	-0.003937089	0.071595368	0	429
q30a2	0.018923791	0.305440394	0	430
q30a3	0.005689559	0.01075526	0	431
q30a4	-0.008646041	0.144730618	0	432
q30a5	0.0033894	0.628729122	0	433
q31a1	-0.000548087	0.86603967	0	434
q31a2	0.007319877	0.411884812	0	435
q31a3	-0.003811242	0.438764453	0	436
q31a4	0.014217669	0.077475296	0	437
q31a5	0.009847508	0.225019389	0	438
q32	-0.00163733	0.571880661	0	439
q33	-0.00054492	0.619356762	0	440
q34	0.002385858	0.106205744	0	441
