# Supplementary material for: Environment- and epigenome-wide association study of obesity in ‘Children of 1997’ birth cohort
Source: eLife. 2023 May 19;12:e82377. doi: 10.7554/eLife.82377 (PMC10198722; doi:10.7554/eLife.82377)
Supplement: Figure 3—source data 1. [file elife-82377-fig3-data1.csv]

	CpG	beta	pvalue
1	cg14817997	-1.54530222564457	0.683608693223295
2	cg26928153	-3.55456983979614	0.802417790695987
3	cg16269199	-0.892443216244408	0.884505678589622
4	cg13869341	-4.52211441643557	0.597920715390065
5	cg14008030	-3.7841840973138	0.756728060003397
6	cg12045430	-1.21124518673049	0.938427912124509
7	cg20826792	-1.24344097963598	0.91418318952592
8	cg20253340	8.41445661391266	0.051018161462643
9	cg02404219	-5.89652401874814	0.707481186357547
10	cg21870274	-5.05886831675561	0.533547736445803
11	cg03130891	8.57619230442644	0.414889975233589
12	cg04098293	-8.02643070798022	0.420466323538425
13	cg16382250	10.5313861000253	0.578690282557402
14	cg24335620	17.1700802987199	0.0347112204544785
15	cg22463138	20.1406254102474	0.248588907580395
16	cg16162899	0.314409817240429	0.966296934988803
17	cg01803908	-5.23115288073326	0.763253952907562
18	cg17149495	1.30789342841541	0.861281293699552
19	cg22802167	11.6198287662039	0.350468506054581
20	cg24669183	12.6971710741101	0.272145085942985
21	cg17308840	-2.5039651760548	0.71035915454092
22	cg17866181	17.1939528526718	0.273127860951161
23	cg25018832	-7.7284895512563	0.407002699695345
24	cg26679879	-4.40854819839349	0.280526285084448
25	cg22519184	-6.15182905710283	0.341445264980499
26	cg11894324	14.2034816081854	0.374806172916023
27	cg24159721	-2.02176855928991	0.911024436591868
28	cg02288058	2.55242896273998	0.699320288423069
29	cg15174812	-22.6458242603447	0.166987452572519
30	cg12376350	-2.67804291517633	0.760268636972047
31	cg08477687	-3.49889495917607	0.215156198246971
32	cg00034556	-3.17187470234123	0.462195484806629
33	cg00645010	-5.0649885918914	0.357206417066043
34	cg15394630	-0.365929698653005	0.965566204023709
35	cg05001044	-22.538132604814	0.171982047692781
36	cg03344490	-16.1354649187464	0.111297312956779
37	cg17501828	-5.55442979436499	0.740014108848175
38	cg11330075	7.46662778555558	0.589697633195779
39	cg23917638	1.26763898235405	0.830227054600502
40	cg18024856	-1.88660181991975	0.53672002069621
41	cg18761878	6.05379623495047	0.489877243605739
42	cg27534567	9.75641257418327	0.0814581220821898
43	cg08858441	-0.908148464592035	0.830162297584421
44	cg03348902	-8.07904637733477	0.578712361311917
45	cg01070250	-11.3943428676778	0.370221559475901
46	cg21996134	-7.82421624624714	0.110132279709277
47	cg07264491	22.0295403759994	0.182238785095519
48	cg01577251	8.45380262689169	0.6843391391219
49	cg13128577	3.72369145377872	0.794150792398399
50	cg15560884	4.95209609225813	0.749517325586789
51	cg10037654	15.6034906734594	0.252868145307936
52	cg14057946	-28.4830537358856	0.0333792385703821
53	cg11422233	-3.82315903469574	0.646959601424591
54	cg16047670	2.34859167157419	0.835192740674341
55	cg18263059	3.54213889693457	0.580242222460693
56	cg01014490	-7.63388043241244	0.289041765318637
57	cg11731845	-0.952443915640927	0.843502543081674
58	cg04231937	-4.06186308077004	0.597968442517102
59	cg04496485	-4.19129858193138	0.624126577583012
60	cg24063007	-11.5672018587551	0.108848279868388
61	cg11380914	-24.6540222521876	0.0196752410468995
62	cg10692041	9.16523126316362	0.110916602283709
63	cg23904010	9.22254445690613	0.432401241335032
64	cg09961319	2.60932219554204	0.731850904727478
65	cg02339369	7.0660736070006	0.327715520429128
66	cg17505339	8.9626024703246	0.665053254906844
67	cg20527398	-17.474815950962	0.333727729705844
68	cg23790246	12.001543317791	0.509767933146323
69	cg20283468	2.82049497810493	0.761936954344496
70	cg09499020	0.609974780724561	0.918074208112835
71	cg16535257	-0.0457808826262822	0.992970900345532
72	cg15979415	-4.48817152609908	0.779925312792
73	cg09989996	-21.7734605732537	0.392056537365408
74	cg05887128	-0.750181761787679	0.965555269490581
75	cg11304639	-10.8337295103417	0.337204637872438
76	cg11954957	-11.2230507940497	0.124459966791096
77	cg01068023	28.8538281705854	0.14391497457893
78	cg08167039	-20.8066675272368	0.207121703178802
79	cg20677962	5.52304618865731	0.536447161644034
80	cg24699430	0.337833364982844	0.963080449242682
81	cg11882405	35.9166181473395	0.166714536840519
82	cg22394869	11.7291471453461	0.849046117803487
83	cg02550592	8.03768831460284	0.503093695494514
84	cg03213877	14.7704228756731	0.588364074844691
85	cg19411932	31.0781620497626	0.242215748927339
86	cg10677828	-2.80329142915977	0.75438626220989
87	cg08939496	38.143505376842	0.0115002043865733
88	cg21482377	0.47646502944055	0.938928204861776
89	cg05440980	-20.7655681345665	0.0351155366329474
90	cg22416599	3.77934942383333	0.703191480587414
91	cg04747364	2.29993988531163	0.896348483669169
92	cg26304905	-19.2521225943802	0.297601410284292
93	cg11255010	5.12899495138277	0.808992806246997
94	cg20434134	61.6858397081447	0.00132408944598105
95	cg16736630	9.96696990946815	0.115283641360628
96	cg21301391	23.2997660763161	0.0550699850196237
97	cg25838738	-6.21517562213609	0.708964232099869
98	cg20350716	4.75060785010656	0.839316945327568
99	cg20836817	-8.07251104607836	0.572732737018725
100	cg03289899	-18.3140852202036	0.445158333979685
101	cg01793617	-3.4306149287932	0.800930510063109
102	cg19973220	3.88670851794316	0.812350101932174
103	cg09139287	3.87253588559618	0.340144603410858
104	cg05662829	5.99388666442836	0.209286378237714
105	cg03440891	1.2825924802488	0.791544012256286
106	cg22714517	-9.43150821923316	0.637084405687012
107	cg00168193	-4.63076841432867	0.805025124495227
108	cg14280098	7.98598293510163	0.611708596332051
109	cg15903280	13.26016881277	0.0452969147949327
110	cg06325811	-1.60675181168066	0.825831820115192
111	cg08258224	6.19198048255847	0.587064332239893
112	cg20447754	-0.519659244367813	0.956565453564253
113	cg12285627	-1.26125909254191	0.927206194341419
114	cg05898754	2.38725788839292	0.784128609921042
115	cg03128332	6.4823503774667	0.430792891079178
116	cg15994267	-4.3578180267759	0.74947994967879
117	cg16619049	-1.257692708816	0.794798220972977
118	cg23100540	-1.08144661726073	0.779624278755125
119	cg27346986	-6.41311511701919	0.478203388057381
120	cg17698174	3.27852900773623	0.725441769312715
121	cg13832055	12.7525437418152	0.281920604919542
122	cg02793517	-11.3373024262073	0.508128896708909
123	cg01328860	-5.55808476100435	0.612907128361211
124	cg11938958	-23.789984251824	0.122200707306941
125	cg16364132	-3.72974652807155	0.62873799374181
126	cg05475702	-21.4360744431407	0.0471181354039104
127	cg01089781	2.51083640975918	0.86984970102562
128	cg18147296	8.74345900583459	0.521153912657866
129	cg05597748	-1.32559173800858	0.9314908008214
130	cg00111697	-25.4009139680436	0.0576580008638732
131	cg10988531	4.50546561442674	0.577787757729747
132	cg06919059	6.62702035559499	0.313635900961393
133	cg05321646	-5.3722738721292	0.713685696062164
134	cg24373735	-0.854149330407631	0.967698091436885
135	cg13938959	7.32376244144625	0.312710900992785
136	cg12445832	-1.26612387172365	0.858538660186579
137	cg23999112	6.45834041718241	0.366435434014433
138	cg11527153	-12.5100473968545	0.359197672266596
139	cg27573606	-6.81660639180596	0.785148393328607
140	cg04195702	-6.89555085636105	0.648532663355757
141	cg01062849	-9.63835766822864	0.474932932323463
142	cg08128007	-7.38029253947947	0.398780362076464
143	cg23733394	-2.12791606699824	0.233009829064502
144	cg13371836	-27.4516813149508	0.406498910445568
145	cg04407431	11.0877534418547	0.7114376285149
146	cg13924672	22.8916171549691	0.118104597971625
147	cg10847807	38.8188119484327	0.138111122563701
148	cg20501011	-14.4665034672413	0.206941279285866
149	cg13565718	-10.4875360585422	0.42248043690638
150	cg01097950	19.7004239824668	0.0990117410311973
151	cg08900511	-5.1864148170326	0.632262724421673
152	cg04410003	12.1509996307448	0.57192858827833
153	cg12726839	2.01487592001665	0.481460029073825
154	cg04364728	4.00411986370324	0.359569137024296
155	cg05151709	5.89088698167775	0.299939200881235
156	cg08546707	11.541456409911	0.0890762743992772
157	cg01782097	-4.7334455975922	0.60194946649109
158	cg20825023	-6.31228230176643	0.501913806424391
159	cg12549180	3.37003505190627	0.783250722854198
160	cg11851804	9.16984581296607	0.330883627030012
161	cg06623778	4.13692167677548	0.539597190907167
162	cg08186992	-3.79025921632094	0.730912391296716
163	cg17436295	2.72672800479981	0.738477937843884
164	cg00613965	-15.1826878253884	0.411183219002603
165	cg18865112	5.21530481594965	0.400345412822566
166	cg21407818	14.4142177147542	0.418048968184063
167	cg22226438	-7.41197220199821	0.346247560729497
168	cg08029603	-1.92545749454699	0.922698046818437
169	cg16347928	3.16527255633973	0.880089019259981
170	cg22699361	-14.838441482077	0.159523198453818
171	cg03890988	-17.2481459771178	0.147402232868615
172	cg21786289	-7.85419976086483	0.395937170194264
173	cg13897241	-5.5707649934577	0.675211093168838
174	cg12712429	-5.62078486812598	0.462812688881736
175	cg13176867	13.0734432397195	0.460782925353014
176	cg15105996	-0.275415919577875	0.968821445763901
177	cg02565062	-18.70622551468	0.184251319120995
178	cg09856436	-4.56676619185988	0.36964490385282
179	cg19159092	-5.85308507967166	0.625274760623938
180	cg27050229	33.2850402952386	0.10459481758331
181	cg06931612	22.5694834251304	0.107785023187956
182	cg11407801	-1.47046701481413	0.898795647759768
183	cg01197763	5.84996534466754	0.749032500853969
184	cg01789792	-3.68593992813074	0.635338643764188
185	cg16352085	3.76163765719589	0.840903850792884
186	cg04839849	32.7342800051478	0.165609614921021
187	cg03725447	15.4314347785195	0.177053767005131
188	cg25215298	6.68883809040938	0.857663120681382
189	cg04672450	50.6278649360248	0.0513614538655979
190	cg20341253	8.17100237553587	0.837062006616938
191	cg27487046	27.4169175489353	0.373139040056814
192	cg06091566	2.00623132503594	0.903965718414999
193	cg03735847	1.78782016882047	0.96523104630437
194	cg27009105	-22.3627096999667	0.458826850540164
195	cg03180780	-71.9616045720202	0.0106227979527854
196	cg04531633	-7.48589708192986	0.653477587034742
197	cg09166659	-0.192663663108809	0.993595178369998
198	cg05527507	-5.99069243329388	0.609437010408774
199	cg14324200	11.1145552627836	0.550798141849268
200	cg13856810	-12.1290886800917	0.162074651827945
201	cg02896266	-16.1393252318763	0.236295018847895
202	cg13806162	-20.9975377208382	0.240431401334547
203	cg23225454	-0.49353028982334	0.966118216669062
204	cg00976181	8.70271427045629	0.573945610251643
205	cg10711230	0.361694496665395	0.979808536646895
206	cg00145911	-3.01351897926172	0.898167534788019
207	cg13546858	1.02112231970837	0.712508591675632
208	cg13692836	1.33420102717064	0.673725119447085
209	cg06531475	-0.634117271244587	0.832870883269726
210	cg06624358	-1.13577271570509	0.727081353385634
211	cg14156792	-2.81754903685098	0.412921154782047
212	cg24997886	0.0651072442954531	0.984343985842183
213	cg01727431	-0.66169519817627	0.845550869095731
214	cg10146935	0.0844107170221599	0.971393482034961
215	cg02439789	0.540465332405707	0.842513490279703
216	cg24362661	0.91481125231475	0.731469730940622
217	cg05819296	-3.09634876449725	0.75121598689168
218	cg00582671	19.8826077213643	0.066026860178678
219	cg22485363	-2.25259856502303	0.842380955141494
220	cg06036236	-2.63204699676207	0.864777440510697
221	cg03521652	-9.74576638942822	0.218929765336377
222	cg13904806	-7.91367923628309	0.499554300997559
223	cg03269716	-4.906586412185	0.494710280104596
224	cg04121631	-3.28525974709405	0.611536936011252
225	cg14183444	23.9715222194183	0.338687625754916
226	cg23440882	2.11816665455695	0.908924870292907
227	cg23112672	10.6566911676696	0.59688069890248
228	cg15896339	16.6991092049305	0.450555961672481
229	cg21801539	31.7220647984254	0.163424421897326
230	cg02676653	52.0853193289641	0.0434904991344882
231	cg19669771	24.2641391814013	0.0676801620978559
232	cg12454161	6.51450767829055	0.665910703258558
233	cg26477748	21.3593138740021	0.4148827361508
234	cg09180262	41.1194855512934	0.0849910334683575
235	cg24045482	34.9322184053396	0.120228247890143
236	cg09988062	2.36252862007431	0.935918225723427
237	cg19724344	-18.916908501004	0.162820878015256
238	cg06838427	14.7967900217853	0.60136457523007
239	cg10827460	5.76589513045429	0.837332399732739
240	cg15742605	-14.2490513412583	0.647974668442207
241	cg09756115	-29.3624562105766	0.0604115954867419
242	cg23731742	-17.5341791523708	0.0669267627055769
243	cg24114126	40.9273154667836	0.0695904280541669
244	cg16952407	-1.5117554970718	0.953816855745512
245	cg06511482	-3.18732400509573	0.861751722798268
246	cg17153432	-24.6791175761354	0.145110013454395
247	cg00113194	10.6848665693657	0.584370822871575
248	cg02968844	-14.6459824891151	0.443022496809688
249	cg16248916	-4.39884582905015	0.849613119147863
250	cg20322444	-45.352875364612	0.0584599648649005
251	cg07983659	7.0480713525953	0.683658578631215
252	cg11733071	40.7579281130645	0.145563049915303
253	cg01394461	2.24535776144336	0.785879845763574
254	cg09555360	12.5779557206488	0.542331946867621
255	cg07701223	-0.787095021561274	0.975381529735419
256	cg13060902	-3.73291131455766	0.849861793489895
257	cg16608242	-12.262312925906	0.0329499135647754
258	cg21830050	9.44465068464889	0.113255514996631
259	cg15684274	-15.5974998433279	0.242371692697287
260	cg16005420	8.80452141323656	0.512880285936927
261	cg02452688	-6.81051338321413	0.457599074296135
262	cg21362926	-0.110430805182275	0.996280949326018
263	cg23430421	-14.6687094445854	0.357252880070168
264	cg24664590	25.8908737468701	0.378416309729042
265	cg08472719	-1.09350450929881	0.963700224266105
266	cg03161767	13.0008805663014	0.571202956244224
267	cg10207527	5.02955674561411	0.720645228020207
268	cg04485075	-6.66076127413339	0.791656089948625
269	cg16389252	62.3955287829379	0.0218959379098833
270	cg19923810	-4.87314660471159	0.539493190712969
271	cg25096313	-20.0004026903847	0.0223875485934868
272	cg13713718	-4.21061804773656	0.766497770049398
273	cg22114309	-2.57416584383071	0.825939801620446
274	cg17368944	14.8782607832577	0.264671846745955
275	cg11132698	5.5137039122165	0.770345368781406
276	cg09789536	3.90076961326061	0.669584899159229
277	cg26866020	-32.178731664468	0.260994969524728
278	cg17505193	60.3941097541289	0.0242900526356395
279	cg13802035	8.56780752828352	0.815373833216769
280	cg07582955	-15.9210197615937	0.24704728200876
281	cg16968662	13.6518630083614	0.443181372224187
282	cg07696918	-12.751503515608	0.383613611999193
283	cg04359978	-5.21938464948487	0.688330874807385
284	cg07236207	9.47979082699196	0.452020040114734
285	cg08198173	-2.07900034123506	0.875448225664861
286	cg01108617	-5.81569380514053	0.64150901434629
287	cg03148373	-4.60065885562696	0.709773457534621
288	cg10644916	1.52856998638325	0.279005618729836
289	cg01930745	2.72020808384136	0.893572884223758
290	cg14860707	-12.8111940342163	0.504334235640894
291	cg14997037	-1.10466890915051	0.945676390689197
292	cg15648958	-18.5905370555724	0.422426943789056
293	cg03041482	-35.2152683876778	0.157624585285925
294	cg00328058	-5.95235915211205	0.659272315453405
295	cg02835406	-2.28816147198743	0.736876552908183
296	cg25742326	-1.89041686592134	0.530721904793869
297	cg12663811	-1.62963284472209	0.747557355904352
298	cg07390924	-7.14485291068327	0.490248451544674
299	cg10110857	11.0367858891406	0.544295930464366
300	cg10375192	-3.32069459494588	0.697805962590511
301	cg02056921	-13.5518843223735	0.492287070731444
302	cg21832150	24.525585113086	0.188904655503659
303	cg24076968	-32.4927802445659	0.0854996768241193
304	cg12536471	-20.0389918667406	0.235991269219016
305	cg06324192	-2.68566535783374	0.813843687683217
306	cg23493227	-13.7689260835696	0.432821886432651
307	cg23207077	-6.92027152956302	0.66244281853583
308	cg24396605	-2.74165322382533	0.723761843282572
309	cg22381068	-0.949246875807761	0.871475027884186
310	cg04865998	10.4096340219165	0.295768499588693
311	cg07195057	-15.6616611810981	0.119095238396975
312	cg26679367	-1.72190636775729	0.86866147298551
313	cg06818851	15.2144537309551	0.244074815912566
314	cg10175834	11.9404162202078	0.319311088449979
315	cg20691282	-50.4051842786398	0.00379566554136766
316	cg23956473	35.5079711780872	0.0771569065860119
317	cg16352072	0.577762953728989	0.951428965536221
318	cg25107893	1.46344957639014	0.788859588333647
319	cg05505459	0.646087459941597	0.769296743108492
320	cg23635910	1.413966421096	0.478144727271372
321	cg08546158	-16.7329933273961	0.0342187580274506
322	cg08843537	-3.79498478125579	0.748468282212663
323	cg22348654	2.41275421886812	0.880847118252086
324	cg18166741	4.18487365442159	0.608837721600444
325	cg22699004	0.892151077892518	0.942703542413378
326	cg09582238	6.95898631376593	0.325744140754601
327	cg10824915	-4.06353024066991	0.671351173536537
328	cg22599150	-3.80308382770568	0.791121552739218
329	cg20869814	18.4252905295888	0.133319731509015
330	cg22579372	4.42824453726607	0.553820153360978
331	cg22583825	6.91377674160137	0.369916437354436
332	cg15526941	-0.587439302975738	0.936881739772696
333	cg10201533	1.12981852122826	0.881506946237829
334	cg11235921	4.76205583290287	0.641819715305731
335	cg11782208	3.74930580336463	0.74294963407411
336	cg11143486	-5.08987170162572	0.569900519118721
337	cg12199972	-1.17250534090289	0.868187668857602
338	cg00380574	4.24383344149876	0.52371780178871
339	cg10381813	2.92901782115002	0.689815558101736
340	cg15628028	10.5873496674244	0.311745671029931
341	cg14350158	3.29290289530781	0.892499454774353
342	cg03394722	12.6860603964654	0.0991998309698627
343	cg26114254	28.4051808092983	0.0838576919465751
344	cg03801109	-6.08086527943729	0.378684672284052
345	cg10010734	9.91159804803281	0.357174371146045
346	cg04983030	17.5075630542603	0.275509143758205
347	cg03648020	3.93575348035373	0.28699013307028
348	cg01729262	-2.20701996030369	0.781652624208427
349	cg15882305	8.56320775099317	0.4689743945058
350	cg15713103	8.84760558548867	0.324522750352745
351	cg23552821	2.10465009927118	0.919247713078799
352	cg05095110	33.1330827199002	0.247483358440364
353	cg15578015	-29.1087536064087	0.354889288614477
354	cg23205003	49.331434617639	0.0954482013442764
355	cg17907238	-10.1259238292263	0.792993437013291
356	cg02397514	59.4883084678492	0.136723071374386
357	cg00447632	0.570856496729077	0.979189835157856
358	cg26339484	-0.686743630703562	0.977407559712706
359	cg27430493	-1.44652254258463	0.94347518084413
360	cg25066040	28.0169096697868	0.221046324614597
361	cg27060622	-16.0966356371238	0.407462381252786
362	cg08122545	31.6462997187558	0.336447017408711
363	cg15825501	-2.90773062127789	0.874217993288353
364	cg13468764	20.928977750889	0.298382658801986
365	cg26321643	-11.8926640520495	0.328471472165427
366	cg16578267	-21.2322808336374	0.264684358573923
367	cg18977839	-3.38218453912367	0.59750986684129
368	cg09332175	-7.12671092967353	0.662005360800256
369	cg16034521	-4.61078371905846	0.758734072838718
370	cg10176463	24.4953022853386	0.316217050369078
371	cg25350899	-34.0504096527921	0.0491131024681195
372	cg06771789	7.25946022625726	0.520533164722039
373	cg13219080	-6.88687454401429	0.654872593300748
374	cg09364122	16.2201903345593	0.0876965235952827
375	cg17142931	2.85592786045784	0.758032779452398
376	cg17006413	2.85003686446937	0.813543991357852
377	cg21472517	1.08271434580552	0.906173055832198
378	cg18019572	-4.64359773236906	0.669806978963324
379	cg22673826	-3.77410294264975	0.717422983349393
380	cg10625579	1.14391538531042	0.304474809137195
381	cg01922485	-1.91894410406792	0.814377047839823
382	cg12763038	18.1357339749821	0.154203570712068
383	cg26155170	5.0554241607444	0.641403326762347
384	cg03125763	4.84389182696212	0.446677780058749
385	cg26155520	-5.98299585687642	0.432197056591442
386	cg23691733	-0.426102750615241	0.973142421937508
387	cg04985032	-10.7131755180352	0.406567388807426
388	cg24004483	-3.62645182947986	0.53412843578842
389	cg23281018	18.0296723048632	0.184654824966947
390	cg24157008	1.33592704896141	0.90437515643116
391	cg25552017	-10.746595213164	0.40952390707651
392	cg10984178	13.0097827288007	0.29605856053203
393	cg26420561	4.75231419917781	0.834444276495924
394	cg22020633	9.42197321973234	0.647778829869299
395	cg01768082	4.69419046808126	0.422043177119342
396	cg07589034	5.12145888725185	0.515617825386526
397	cg22367159	13.3362045339663	0.0531852301546197
398	cg26837773	5.15627080286266	0.413797960433268
399	cg15825373	5.69040805644432	0.665597095498106
400	cg22618402	38.3445324641468	0.0996488064307863
401	cg06538872	9.58139453445589	0.442566454018779
402	cg22182593	20.8623278172756	0.0389404082569975
403	cg25610492	16.7900362369057	0.0675274109195101
404	cg08469540	17.9638248820844	0.224870106410153
405	cg20022511	2.5899099768927	0.915912637692293
406	cg21503301	-6.65598471733189	0.727436895912563
407	cg22115423	-2.35684369407827	0.920318810920624
408	cg23684711	7.24846332153504	0.76741712025118
409	cg08067365	-15.3787732844845	0.582655350825356
410	cg20062691	10.3162010248445	0.173778246300752
411	cg03811829	12.4890123482532	0.138551976153185
412	cg11211792	11.3668426482405	0.163864484078854
413	cg04788999	11.1046421090761	0.116630693180997
414	cg16526047	7.57069009256505	0.303947408751394
415	cg07123796	4.02208263335164	0.64073999270759
416	cg26560020	-7.95461910447449	0.450862612011684
417	cg09363892	2.18314749092347	0.811345224638397
418	cg03185752	10.1919954558345	0.420227538766229
419	cg15153791	12.3687907569356	0.581917704691323
420	cg04336684	29.5967451582476	0.295986720973392
421	cg22482746	-77.6074428121439	0.0226272680805316
422	cg25177113	2.78976102165147	0.893001456583074
423	cg08223393	33.4221245307928	0.0290362427709792
424	cg07008945	88.1302399760169	0.0428681435611666
425	cg11726631	-10.2279883347227	0.746839578361575
426	cg19813362	-24.4320634079829	0.33035513702071
427	cg00299257	-26.9765651985507	0.1457438123968
428	cg10046671	85.1595021816858	0.00447518649398576
429	cg24704476	-8.47574888735321	0.366507827671076
430	cg13917577	4.03798167977067	0.13299606930821
431	cg17801765	6.90707551170409	0.210961572557829
432	cg13100600	2.13307810097935	0.742585347774239
433	cg18272461	-1.67627192813105	0.840400934078788
434	cg07787977	-15.302779057353	0.14777705810248
435	cg02632261	-13.531687603969	0.569690885124169
436	cg07396477	42.4995142899998	0.0237469670838943
437	cg15574137	5.75613579751725	0.760945243055715
438	cg25774148	-13.3762242915455	0.399214015017087
439	cg17021880	-1.43153226510266	0.931541825539933
440	cg02288964	4.41261312509975	0.611910548419627
441	cg02341264	2.37291057276638	0.617043296288437
442	cg06712559	6.56190022067216	0.776537404971415
443	cg17928920	-31.2185720334151	0.00320783443393819
444	cg14663984	8.75569503145352	0.65592727189642
445	cg16318112	18.1219659447047	0.148912141866414
446	cg09248054	40.5563852869532	0.00768468001830321
447	cg15840462	13.7999578391821	0.333723451686946
448	cg24598973	4.00771501136352	0.627156616375128
449	cg16502826	1.02369366874595	0.920364577353101
450	cg18147233	8.78470784094712	0.252365545982842
451	cg20741620	-3.16527827006903	0.772463364611089
452	cg00525597	12.0718947495318	0.461180010062041
453	cg26007962	-11.3182951409886	0.517469679670549
454	cg27541454	13.8471666741855	0.152000634831027
455	cg25759916	10.5429741849904	0.689131676298465
456	cg01150641	-3.69070517478841	0.818140578609441
457	cg23625715	-3.28931461678084	0.914264157994246
458	cg26222311	41.3072265188159	0.218106314592685
459	cg20594982	-4.79588582771663	0.400599089731601
460	cg06819605	31.6616527871294	0.37383215325224
461	cg14248627	-14.2709468672082	0.0701610149553275
462	cg03790440	-5.47219570290888	0.814650249287928
463	cg15475967	9.2931271878602	0.582893655203846
464	cg02138082	-1.22375622656544	0.836165359500923
465	cg10983617	22.9266888775575	0.412399966111952
466	cg24934837	-3.53100221440065	0.803766650971557
467	cg04029236	25.1036202511326	0.127106802412752
468	cg07407159	1.27698035606632	0.808478061032531
469	cg16657578	-16.4411511451941	0.49763696625368
470	cg09134969	-39.462675360353	0.0178256099988505
471	cg02635644	42.7061138849099	0.147447397563193
472	cg01711077	0.304622386741484	0.972761918607146
473	cg11471767	6.40906767893152	0.677232531629652
474	cg07501049	66.9411032829446	0.0951653924899916
475	cg14253035	-32.7044483336657	0.106412618736691
476	cg12469361	13.1647024459335	0.541726211635697
477	cg24685837	-0.972017678532092	0.873455688136409
478	cg20988802	-2.33029185157694	0.903631005486719
479	cg02245706	-16.7208608495835	0.307489244930893
480	cg22379708	-1.94806116146025	0.864875514789696
481	cg16026189	-12.913908122028	0.613041607696911
482	cg18380070	6.295383842674	0.759021399301203
483	cg02494066	-15.2476345982735	0.217534648529247
484	cg09792712	-10.9298550028877	0.536000830463276
485	cg15469001	-9.25849375068681	0.572920127718323
486	cg02742603	-26.0493069236382	0.136164378746002
487	cg08387293	5.02362902976985	0.726811887546478
488	cg24730157	-3.12521090461458	0.811490487570132
489	cg10309261	4.57511059676902	0.826965548623139
490	cg23801338	43.2202551200934	0.155842974468865
491	cg13244315	11.6509527580166	0.511479925362552
492	cg11708842	22.5717790625569	0.190657415719276
493	cg11853970	20.4778126173078	0.29407323132149
494	cg08480609	5.7057494387024	0.661590643757536
495	cg03120284	-2.40918767258589	0.885941811809341
496	cg27561293	12.8753729263707	0.804294843023453
497	cg04391811	-78.3668572860417	0.049984278280539
498	cg12147785	-15.6730442394963	0.544558605936994
499	cg10490668	-24.0554261002876	0.192831233004616
500	cg22627753	-4.52959382136119	0.604303007341117
501	cg04559824	-11.8889761310586	0.445630440421712
502	cg07912402	-17.6756417095803	0.692850555147783
503	cg04274259	-17.0657741210677	0.342856496651536
504	cg16903000	-32.765668802255	0.0907386888424584
505	cg01757980	-7.24504597470395	0.692222018619028
506	cg12483930	-21.9500280426028	0.235977198288712
507	cg02415349	-2.05692249059567	0.915778371299868
508	cg14252395	6.42106041116001	0.049713667500465
509	cg02096324	16.1968395646031	0.447088922085442
510	cg08262378	13.7763101065085	0.46444588459056
511	cg13439946	-2.50233081423934	0.754990253268413
512	cg08250879	-9.29870468971973	0.19142447154943
513	cg12184864	-15.449012503261	0.254784415477411
514	cg21607076	16.3012940308439	0.165277555070495
515	cg12647165	29.1086002833781	0.181280185002923
516	cg02482614	-24.5154021588248	0.322880227285589
517	cg17098415	1.65221170350648	0.940399536601315
518	cg11308274	44.8947030026331	0.230733837019647
519	cg08459564	-15.3423780231193	0.394171036392762
520	cg04919596	4.38864491855312	0.496621573483744
521	cg24678117	6.85228915372711	0.417086024048129
522	cg22169680	-0.289580622525438	0.98052428330363
523	cg10720997	-14.564114537449	0.365353572890747
524	cg09908510	4.49979625897132	0.733590881447096
525	cg09123721	-0.327950411825277	0.961530303576164
526	cg11405655	2.92542828286024	0.753499270209975
527	cg25523405	32.9146309461741	0.212144538096842
528	cg02105666	0.945580015385215	0.973202022033675
529	cg21139076	-9.37478259188141	0.440742708489927
530	cg07549208	4.27400592505016	0.66270655160517
531	cg21779088	-1.1802627512322	0.931248716593552
532	cg26614117	-17.6131491371336	0.188534341753001
533	cg06095202	9.50948705028517	0.48517993425188
534	cg04891761	8.72555320064104	0.31541088823481
535	cg15500259	2.44024333268037	0.846371006978768
536	cg10955566	2.43262359164896	0.5627502591835
537	cg08709360	1.22817179311961	0.733880953579654
538	cg01244934	0.094877382759269	0.985942399095181
539	cg15899727	2.43042859073648	0.617892609686743
540	cg18432292	4.84325717410696	0.507745502998536
541	cg24475622	6.53827920109595	0.602096409626761
542	cg07147720	-9.3629279219017	0.722056455632397
543	cg24047311	38.9508589997541	0.265264711477802
544	cg16095440	29.2322654028342	0.527442145239195
545	cg08750554	-1.67412405701673	0.871728599837473
546	cg26702212	10.7568146596907	0.436375891521345
547	cg24517686	-5.05603111842175	0.740894573147519
548	cg27222785	-2.90403715686641	0.875864839075684
549	cg09864227	-9.51313947005674	0.438302214613913
550	cg26111997	-14.5403050994108	0.296741274224056
551	cg07181843	5.92384103873069	0.651386143937674
552	cg25646531	-3.98987387664794	0.751760810322951
553	cg00478379	6.63738138564308	0.551897181864311
554	cg10782557	-4.40188729225648	0.67253999261342
555	cg13754917	-4.24573650048635	0.688109202155571
556	cg10168544	-0.695514106056515	0.935355337137742
557	cg01912388	5.96733465212242	0.337373399881056
558	cg14854474	-3.3335595891137	0.592255993824695
559	cg01518906	-1.4874983361241	0.847004683192231
560	cg14964771	13.7390328027506	0.332339306660672
561	cg22044028	4.29755800188715	0.357132808729327
562	cg15576492	2.30894962494469	0.402181043671377
563	cg11200797	0.17663402822256	0.977258539221528
564	cg16383573	4.73804209617129	0.831754542069923
565	cg00305285	5.67456886720936	0.476313906145028
566	cg24378253	-44.9648560658104	0.270490575755416
567	cg04794393	-16.4314158836209	0.410357299263706
568	cg17840536	-0.376775531427447	0.988627993713423
569	cg19758750	-15.6852977648541	0.410022796031475
570	cg16632098	-14.8832382579364	0.420006399234201
571	cg18024260	35.2806578091611	0.408074683807455
572	cg12924059	-12.6341320233994	0.595500923633211
573	cg15099245	0.132101493885717	0.993638798743105
574	cg08039585	-9.58219289563041	0.505794728041386
575	cg19734301	-10.0356038763248	0.53527704220486
576	cg08470135	-0.06958983018606	0.997195014355699
577	cg05035248	-44.6185532823773	0.378079369744472
578	cg05041517	12.967013429244	0.448349446092457
579	cg15207999	7.50314033653935	0.720448417425855
580	cg26338735	-10.0228860248617	0.624270680224989
581	cg24437834	11.5083280631505	0.618075194560278
582	cg15565004	-29.6440941648806	0.0391955303578428
583	cg19999567	-2.79568999019481	0.736987480482045
584	cg19856606	-11.9347246245153	0.458440416949363
585	cg12743165	17.11553453719	0.396140786605412
586	cg04065236	14.0334907052145	0.511954776589145
587	cg04315086	-22.4255281794281	0.303097564230459
588	cg09358422	28.2595332893333	0.28412190487111
589	cg24523322	-58.526398168858	0.18335631722639
590	cg12612065	14.6908529895564	0.447787654042024
591	cg16060740	-17.9716148090861	0.286692180506051
592	cg13870982	9.80803107844556	0.594713087502084
593	cg14010231	-15.1945005698738	0.552638532165801
594	cg22343299	19.3289859179933	0.594028530352378
595	cg17596279	21.3461554634079	0.314224149560868
596	cg15322667	-28.7516770257282	0.103610321861704
597	cg00648573	8.36234863823377	0.606035860480217
598	cg11144217	69.3238016247214	0.11176495104874
599	cg10782633	-83.6104431154624	0.13856417424571
600	cg27169685	0.425836412177468	0.983094485509474
601	cg06727198	-20.8630674156354	0.337675730850681
602	cg06375409	19.8963515378464	0.280583135461912
603	cg19307389	15.3642090851687	0.31820120127291
604	cg06444226	7.03325755999278	0.524852127061033
605	cg06181703	-3.9617737695502	0.898110383983253
606	cg23812948	16.5502202047582	0.278463755686585
607	cg17539962	-9.56758466781801	0.34909232847443
608	cg26040075	3.0827754328363	0.80825469431736
609	cg24165743	0.879738989913581	0.940508387656534
610	cg05007472	10.1242286565491	0.640626284544202
611	cg01881456	-25.8241002605882	0.0907749953684593
612	cg00546078	-6.71628539559674	0.222285037016185
613	cg16685990	-6.19069858872272	0.712295010354565
614	cg19860160	-12.7334789667296	0.312986907420984
615	cg26405545	-7.63471187446234	0.719397069291565
616	cg20961824	-6.18498808153318	0.606569170348826
617	cg09762182	-1.10319289734129	0.258653802482719
618	cg11754357	-23.12424824756	0.288008577883359
619	cg05527091	-51.2756970455489	0.279508141276429
620	cg12137247	10.7312854840498	0.581718448522852
621	cg24709745	-22.4498098124666	0.348580671735291
622	cg08927102	13.3626791105719	0.62268559314758
623	cg27302190	6.12892113220429	0.681028348745289
624	cg18025136	-1.14209495335651	0.891872850531567
625	cg24638131	-0.0874546294457499	0.995329145281262
626	cg14981312	19.34471486516	0.306606774710849
627	cg09383789	8.66737287152995	0.741864223532022
628	cg27053169	33.1597407709807	0.0223729080145873
629	cg26541516	7.0683608974852	0.74710164570327
630	cg03956833	24.5848684608266	0.433108689143416
631	cg08881995	14.3453029572415	0.759386150633437
632	cg03705284	31.8195614046736	0.463809709393389
633	cg15030799	-6.38202071499764	0.856758943286495
634	cg20156053	15.6014880944626	0.543530178879273
635	cg10126324	-0.244389605759422	0.96984753952703
636	cg06036677	-5.89127365819681	0.388306678053472
637	cg10579718	11.1049396251219	0.305701865882913
638	cg16679343	11.0398047183254	0.354685426673056
639	cg19626656	8.53063468032387	0.325790592339168
640	cg18943819	-16.0927467850231	0.18924379656452
641	cg10026356	40.2450936508022	0.0249725449148934
642	cg19248961	-3.51665249865505	0.661110232385079
643	cg10177439	-7.81425916062091	0.616353145557151
644	cg26346563	-15.7518593431351	0.247975667232773
645	cg00918900	10.4122012079331	0.0970237816116935
646	cg27582017	1.08919280962595	0.959263377571874
647	cg10113217	-16.8392598915941	0.0466031104053118
648	cg08899471	-38.5703024297228	0.0638819884798198
649	cg11920144	-0.275330345636364	0.986088251133886
650	cg20619296	16.8909220752168	0.347410377969163
651	cg18329352	-5.101746809303	0.636036825589751
652	cg25973293	-6.2996559667386	0.719612493514323
653	cg27582546	-0.607503318604563	0.943528002029957
654	cg03520879	20.0270683777965	0.32447386605906
655	cg06798288	-15.2236370129064	0.361866993966248
656	cg23035597	0.192760328079419	0.987173614221574
657	cg02838683	-13.9522161230702	0.440381668843157
658	cg08131937	-11.2354552308852	0.531037951921139
659	cg22512779	-21.7199781035126	0.100645361182406
660	cg23622235	-12.5943155603528	0.496390229978066
661	cg17094363	25.9865285624322	0.162198554108932
662	cg09146328	3.40726022917571	0.683203530118335
663	cg21775619	10.5231113025738	0.321030536072437
664	cg07179016	-15.242548485239	0.04421854348888
665	cg07203151	7.42798210848892	0.572079886640991
666	cg11750929	7.97457073903594	0.499421001217068
667	cg01776299	11.4691100943881	0.26679847156867
668	cg00300303	10.0528755430573	0.215859413031818
669	cg09032281	7.31640291855052	0.464510096043369
670	cg02852398	3.92012841703771	0.669043515437973
671	cg18272703	-12.4174833276076	0.556570293002133
672	cg05528516	13.0031704188252	0.0260622785061677
673	cg13361271	4.67346368781676	0.80588377708597
674	cg25237545	-28.6443443641636	0.038286814115685
675	cg09914843	-19.2670281775296	0.426259527779857
676	cg15822328	-3.02824856350189	0.807565359609074
677	cg07304255	-3.64858304025657	0.853254847161419
678	cg19925558	28.9321568792357	0.153299028036451
679	cg22433276	5.08529422801646	0.849915506310813
680	cg06615380	8.14456042025356	0.72714794100928
681	cg11071912	4.1168364510179	0.480545339314775
682	cg00812770	-2.7556447090851	0.806013792210371
683	cg16254267	-9.42055522050316	0.39457372602749
684	cg12274407	8.08530637458098	0.372876767104563
685	cg16639967	2.75850255006958	0.887877952596972
686	cg14824543	-1.33657498718359	0.908568005990473
687	cg21862126	8.55212693508378	0.181358594832723
688	cg12097325	5.39162821189162	0.367299948677955
689	cg15207968	10.0685117007136	0.481283386264328
690	cg12755103	-9.13146817998896	0.652470172508487
691	cg19708306	-3.95432880900714	0.548833073678233
692	cg03760138	-14.4228283654815	0.0473065011295701
693	cg24158844	-13.4237372606122	0.343325399820902
694	cg25772221	16.9887322236195	0.353353420483803
695	cg16140890	13.6922440337494	0.413102114645665
696	cg13395069	-8.32580077712233	0.538750454232451
697	cg03228985	-33.8295458872423	0.0457507058858663
698	cg16989340	-20.6333734901304	0.159392733917752
699	cg20254790	7.91310431862898	0.461008062828903
700	cg11811960	-12.0702414787081	0.385995330137322
701	cg04311266	28.5762272692584	0.128849306501734
702	cg05929553	7.22026450456234	0.791271051645316
703	cg10399850	-4.38316786644075	0.641115920512829
704	cg08803531	52.8353664917127	0.0202267831271252
705	cg12806826	-15.3103542513981	0.414665199490409
706	cg15988843	-39.3056806776156	0.118008946061394
707	cg23891858	13.0905054769694	0.183665528777976
708	cg14288281	9.40367552600142	0.254610148975288
709	cg07213830	-2.32234284661706	0.664713427659794
710	cg09661118	-1.61446142853562	0.908319274283926
711	cg02971920	-8.2899996663615	0.446152052139538
712	cg06767191	-30.9480613241217	0.111865514331456
713	cg15688253	-5.90209236608282	0.789579140008568
714	cg22864340	-11.8939750666478	0.477034723457866
715	cg10335452	13.146700845154	0.339345409304827
716	cg06193359	-25.0325406147389	0.189363644154921
717	cg13560058	-32.1733412413508	0.0131583610716656
718	cg00082285	-27.5199090577523	0.026465312388199
719	cg21778193	-10.2499499807554	0.0524455640690122
720	cg15489799	-17.6303932980076	0.0519507760364566
721	cg22521151	0.615014553909131	0.961175885623364
722	cg00207921	-18.4414213146726	0.117748785780996
723	cg20544808	6.10803886564335	0.581380932860591
724	cg18792131	-4.60120136205662	0.641903333997782
725	cg08090385	-12.1522757785774	0.228878381736068
726	cg08474826	-9.75767854670511	0.418309173659766
727	cg20185617	-12.817971643752	0.288852064987906
728	cg04972348	0.339524945742541	0.949137495088126
729	cg06618740	2.79669334058764	0.489905444648739
730	cg15414773	-6.93267032788208	0.28110894846678
731	cg21475076	-3.26475423902482	0.613467797071424
732	cg14476334	-10.4186595659944	0.154836023118162
733	cg22109930	-7.79066103649112	0.434582530133076
734	cg13449535	-8.30863062053948	0.297313159415584
735	cg07123481	1.13906761577472	0.929607023856018
736	cg01537494	-17.3188658387761	0.297159626728095
737	cg02825344	-22.3571384130846	0.190057756377739
738	cg02331673	8.49917301814393	0.637929825178073
739	cg11203990	-1.8387417293223	0.895598125790759
740	cg13362546	-0.238372852494634	0.973050386625494
741	cg21810793	-7.19919158796259	0.688583411543766
742	cg25101291	29.4702307751341	0.100011901193992
743	cg16561256	-15.6378478133698	0.383282533922215
744	cg26330479	3.31764566841275	0.777716587158065
745	cg06967105	-2.49921974518934	0.863113491865177
746	cg23651812	-2.16752937952549	0.652312071721693
747	cg03528302	-9.61460026444009	0.517829030955337
748	cg18348086	-12.5510276071334	0.620870511032721
749	cg23731501	2.65171320063276	0.727063776791032
750	cg14287724	16.6528339165895	0.0179338488633523
751	cg25605174	-3.53010311245779	0.767799583486102
752	cg26578072	20.0491415648631	0.124291057768014
753	cg23857983	-3.35549280635925	0.531903623448308
754	cg27631599	-3.15952888288877	0.454142413978596
755	cg14709479	-3.38807497339891	0.157647598708456
756	cg14786652	-3.30880970408055	0.0947225404237543
757	cg21288685	-8.06415272635028	0.121704495320844
758	cg25544075	0.492661310525764	0.924382614869906
759	cg10143960	-3.01692409208527	0.0699765297352794
760	cg01511231	-4.51730272019885	0.0464765061719577
761	cg03278726	1.24052397509425	0.802458730281218
762	cg15417666	5.85744085172751	0.282414429212687
763	cg18770446	9.86582179592303	0.266698493626662
764	cg22047469	1.35691648215928	0.922845315947206
765	cg08933284	-1.30146863093857	0.876545814435788
766	cg04206665	10.9333828837438	0.449501260013691
767	cg18382926	-8.60283827556358	0.405897545494068
768	cg08844387	41.2308689441949	0.0487853496020903
769	cg16043700	-24.255012829097	0.0345383818535412
770	cg19584957	2.22133696009619	0.901493138804017
771	cg07173112	-2.65676848117875	0.869347996528779
772	cg07841371	-1.65865323058742	0.853341579461597
773	cg23275914	-15.2194170129148	0.205274154164483
774	cg14220262	0.745150371150224	0.956155284543213
775	cg05555852	-23.6192784494861	0.0919758505055722
776	cg02848157	-21.7096242698134	0.284426800237156
777	cg24884961	-2.59839030990568	0.875624548745168
778	cg17168771	10.4665525713759	0.68585107770461
779	cg02014020	0.399426504221562	0.990314442272204
780	cg03340606	31.1877006163135	0.359344942953076
781	cg17510786	25.3205519017248	0.16037075597442
782	cg19724260	-15.7990941293937	0.293781051352118
783	cg05706898	28.0810661951908	0.0417136112996685
784	cg14008593	-4.64337012282894	0.56910758993822
785	cg00699898	-1.98189492001313	0.830741936216259
786	cg16366262	2.42380465443308	0.559432282074803
787	cg08886036	-6.42190844064549	0.664252071212236
788	cg06440474	-2.04805966207205	0.885066294073615
789	cg16053440	-18.2256825216317	0.182346826150716
790	cg14278226	-18.1115096084971	0.222344525262207
791	cg23087108	9.89380649109517	0.682525445467466
792	cg06910084	-9.93469926696731	0.492475799753588
793	cg04808954	8.9535462232776	0.162203039440326
794	cg10333212	5.91554342730936	0.404516686283847
795	cg05652547	15.2220528231471	0.463696419030197
796	cg02852923	-27.5668600813215	0.182453595308314
797	cg00146669	3.28206736102124	0.849671739937773
798	cg18411941	-0.469790645401785	0.98218554913221
799	cg09021712	-26.818265040258	0.0892765681998896
800	cg04154653	2.68668195854707	0.0932589513378502
801	cg14000174	-9.10038251665082	0.510796513164408
802	cg13089299	3.74650580717038	0.823404801294854
803	cg22723960	6.38973014929327	0.780602449712976
804	cg13360866	-26.4955098432635	0.0542585372984588
805	cg24807889	-18.8175852776243	0.178227072048032
806	cg05952202	16.6718400603945	0.594599384740858
807	cg04172501	0.822248239346442	0.94077195732712
808	cg22696995	-2.05910935662562	0.923025636249236
809	cg23400617	27.9373560546707	0.237356669228329
810	cg06778273	11.7788101477536	0.445200795694158
811	cg18319381	-4.80938721412849	0.714229979631829
812	cg19413397	-1.53569244966705	0.935429278017873
813	cg12810734	-18.9907471790334	0.279279193795089
814	cg16046810	-30.0005471121351	0.129716584609695
815	cg22345205	-7.50090895211618	0.623046318730457
816	cg21038584	1.42720270638028	0.826575756910563
817	cg19237691	-0.838439669467666	0.950166041080296
818	cg08641866	43.251575457414	0.204811682285307
819	cg14886269	-21.6744005388563	0.102811753120342
820	cg15706223	-9.58984635233969	0.505355176717185
821	cg06097659	7.26794244700407	0.47532344454174
822	cg04343794	-9.994156276632	0.207799009149844
823	cg07671976	-23.9835440903285	0.0397290599484957
824	cg25725823	-14.4790357025549	0.0437508694889441
825	cg00086243	-16.7418843518778	0.0178027215753811
826	cg10583942	-7.32276903058687	0.12253334198362
827	cg07119157	-8.71788863608073	0.0900249038189388
828	cg19092396	0.317756323214251	0.969993970029816
829	cg12701018	2.45453877904994	0.851693058344553
830	cg25144135	-2.12183667472228	0.787555046316448
831	cg20996124	8.79290869899201	0.52926545403854
832	cg16266669	4.24567575124145	0.430936977881292
833	cg02296931	-2.15573403199175	0.743095569791513
834	cg15924570	8.08342668794497	0.224146919292395
835	cg15993652	-1.19819813909534	0.850070095858562
836	cg25625296	-22.3470824088539	0.209917071746729
837	cg09503311	10.9431211075687	0.550544175945915
838	cg20544186	-23.7694437837658	0.179470099354584
839	cg01437515	5.08931412055374	0.15199989397743
840	cg12759096	4.25113631010925	0.448019446706368
841	cg22335801	6.4337685475532	0.448143186889036
842	cg14661234	-3.77951967934723	0.520357425986724
843	cg23166857	1.04763078738532	0.879280540472314
844	cg09586191	-2.37738998539309	0.847192679404355
845	cg01341040	-5.44061015557694	0.687471580425764
846	cg21616720	2.220412846638	0.833240422348629
847	cg21815220	-36.4218077154924	0.0141150956446533
848	cg17084044	-12.0466541201094	0.391464993235582
849	cg16252905	-25.1885040358665	0.136993073392637
850	cg26312965	-32.6213861000987	0.0196605500692703
851	cg09315878	-13.2557178476084	0.103203188694559
852	cg01075305	-9.92835276703716	0.763039904002587
853	cg03058163	0.865921476369667	0.918123103882604
854	cg03580801	-49.3639183291924	0.0196723813397501
855	cg19862782	-0.972203795386164	0.964221252102058
856	cg12219387	18.559050961518	0.286310272175172
857	cg11727921	-5.9931887728922	0.734155704318571
858	cg01783406	-0.171933700510918	0.992857005446024
859	cg14531564	-8.46061666799504	0.19195460064989
860	cg09276842	1.04351123787982	0.946062620894384
861	cg07548512	1.57933949296908	0.973772386286493
862	cg22798412	7.12947456111279	0.790546979794324
863	cg27477059	-21.7010515094888	0.175037499204587
864	cg25578497	16.4402585617925	0.33809178956981
865	cg00656410	-6.74962521420074	0.585580178909167
866	cg10206039	-1.55501880981328	0.884475282749909
867	cg00062072	2.61470403241716	0.294110554139163
868	cg05818515	-4.80287318151151	0.717576604461641
869	cg25282454	-0.893552156259989	0.642435949473313
870	cg03467014	-3.88664738100096	0.867658657721938
871	cg09819798	1.84349287677489	0.451795630315045
872	cg23082845	35.3249732924884	0.100790551451916
873	cg04559485	-14.3385718482105	0.55502965126116
874	cg21837391	13.5349110096394	0.420347941321364
875	cg05329510	16.913887427105	0.190274469320686
876	cg17414873	-2.76472752592203	0.823225317922336
877	cg03935783	16.4433523658982	0.63655955795219
878	cg05638471	-12.0564439052671	0.147229015863324
879	cg18367529	3.32634940753592	0.091000932544687
880	cg20300707	-11.4933810398522	0.509606197326981
881	cg23963070	20.6720225598615	0.0673027987288945
882	cg02974491	2.52136420045195	0.367417415472649
883	cg09812885	-18.0333866497462	0.348948477780114
884	cg13470499	-16.5822611750713	0.463702749250296
885	cg27310827	-9.99792322861816	0.791500517244447
886	cg11257497	15.657340383096	0.512923731551206
887	cg14965611	-25.0753868313244	0.305769169849725
888	cg25619287	3.34874562940067	0.531039985732766
889	cg20014591	1.80046261082973	0.930058672267318
890	cg02224920	2.06164285929136	0.949494508197019
891	cg20871445	-37.4383380913824	0.173243967491419
892	cg14394203	-28.8300260763125	0.351766863681151
893	cg13924635	-13.3230998130025	0.317840869385056
894	cg08701814	-12.1177930502822	0.357432201908341
895	cg22220310	-70.4336187380908	0.0978398919722211
896	cg14477263	-15.7549488242278	0.602499876282399
897	cg08706355	22.5428830332718	0.27525761310745
898	cg07963816	24.5620619633179	0.112049271447272
899	cg07146103	14.3437439313471	0.434509710042159
900	cg25731959	5.36428609325814	0.739559713718316
901	cg14830045	3.23850320152914	0.638158149166081
902	cg10784110	-15.3687064064387	0.213309428300695
903	cg06964912	-11.5430559014916	0.169885679252173
904	cg12108798	-0.182722980810796	0.983723195871424
905	cg00657094	-5.99597303942396	0.564578918225285
906	cg20411340	-7.47875568610375	0.424341743182521
907	cg24034746	-7.22764705626117	0.533571131597447
908	cg09331144	-3.55185951516253	0.504914310867774
909	cg10483828	10.423206356978	0.555076103497087
910	cg07719599	4.93965849699074	0.759081025651341
911	cg00211609	1.79924360557381	0.860515373051197
912	cg10378904	-15.4404879348262	0.231489843744357
913	cg22512888	-20.661842078676	0.210156284100413
914	cg24345856	-1.14128594862011	0.41175912754451
915	cg21664227	9.85292107728954	0.477896717289548
916	cg26362806	-27.4075805762071	0.176282754181883
917	cg19666520	29.6622153048114	0.373549374186135
918	cg14329010	0.322939962642159	0.987873343651669
919	cg12345380	-13.7895999475352	0.229081960057161
920	cg02279987	-4.16211581811987	0.457697862132896
921	cg19236794	-1.32360816176566	0.757132321086924
922	cg04719903	6.78246689201101	0.41573900647527
923	cg25594899	27.294325430995	0.315393655182512
924	cg06136878	-7.49460715745771	0.806711000208822
925	cg14089984	6.73165228906973	0.677800904202539
926	cg06443533	12.2784366741435	0.345098397336874
927	cg26314055	-7.82130140319681	0.60695313638114
928	cg02751993	12.3336860593907	0.453977618211418
929	cg20747739	1.65098297466456	0.867982751672805
930	cg15582176	4.52552394927207	0.571907656498904
931	cg13440692	2.43383445006713	0.541873986122157
932	cg10664344	3.12340856951721	0.357118883573556
933	cg17267508	29.6296897372715	0.0855184632740541
934	cg19869091	8.90173615588879	0.746441271951547
935	cg08643618	8.35045282289967	0.831158234026546
936	cg24701867	-4.3849630100828	0.930028552995442
937	cg06361835	5.17711411710671	0.792927804734488
938	cg16176300	5.70738642933559	0.64245432970529
939	cg17469240	-30.7653215120458	0.282860571134461
940	cg19081571	46.1273431088007	0.0810517247023388
941	cg13689260	-15.0497273983891	0.498038967358934
942	cg06754550	2.10608366535035	0.925874204899551
943	cg10518155	-5.28838683645319	0.843272443577744
944	cg17784606	22.5869277903804	0.222275644231774
945	cg18153662	3.22841488436402	0.863955045851896
946	cg08733913	35.0644149931203	0.1424540248494
947	cg02334770	-36.4914734455291	0.0457130780175522
948	cg03583709	18.0955651336549	0.424797208833354
949	cg13152599	-27.3659210103687	0.161549364683641
950	cg23880637	-0.779126398204718	0.968454378276084
951	cg22699977	2.48177605572012	0.864824986579853
952	cg10245314	-15.5064502106905	0.18719202797126
953	cg21583518	-5.04207959476558	0.568494234056865
954	cg14661139	8.84082555782547	0.22452870838144
955	cg17177602	5.88786380027834	0.354654321521689
956	cg08884932	0.0613854898296289	0.995132604910423
957	cg11225330	9.37800560022418	0.230480845088034
958	cg17869799	-9.85765259027615	0.00920860591393847
959	cg03525583	0.614973554736814	0.968733993705303
960	cg04026747	-3.10781677242475	0.887063014784694
961	cg19709095	-16.1014574546467	0.460365728536201
962	cg17848797	-2.34094110261273	0.831449899137679
963	cg12631550	9.97415047489556	0.429077179130635
964	cg21680388	-17.6399599247874	0.323917379603499
965	cg22725197	33.0230481344604	0.0153513619642039
966	cg02823370	-1.91311014355836	0.889080771273678
967	cg08486042	17.291775308285	0.371284196276968
968	cg07269843	-10.9368934936121	0.639866485415137
969	cg01341249	-6.99340294864777	0.296171156015631
970	cg15578176	2.43114281543825	0.863026681250727
971	cg09906735	31.9006917757427	0.0778376706320489
972	cg25674129	17.7701540266384	0.447844282373317
973	cg13375638	6.08841335389479	0.789924244601677
974	cg04296903	95.4066789184167	0.0844047507976853
975	cg26527092	28.8154354758191	0.159162566352903
976	cg19816994	-69.4508179211358	0.0607748840056631
977	cg24658349	23.6649530596277	0.277761869774328
978	cg02859098	-11.4586127047036	0.452478667796481
979	cg22009470	-9.25055585969307	0.123080291320464
980	cg17599045	-8.32983025327756	0.507763146681793
981	cg16045223	-9.6303535967975	0.459949572676922
982	cg23891364	-3.65637168856911	0.527016269639644
983	cg21864845	14.9781025492544	0.494278156511997
984	cg02913364	-1.55851636243831	0.953760849461553
985	cg16717690	5.3394274033434	0.885699575738299
986	cg09094385	-16.6179364788688	0.464447204681874
987	cg02581421	-22.1927290141497	0.552647498960205
988	cg03322129	-20.6516093837478	0.5176756430764
989	cg01794932	-60.9649202961675	0.0855374963644587
990	cg26163375	-8.35279410252955	0.80148695276562
991	cg22670128	8.87374115339627	0.596080874007904
992	cg10410269	-2.9585421226534	0.810452189049579
993	cg19933051	-12.3155542937436	0.444814793617347
994	cg16626107	4.37582137561655	0.786849302073596
995	cg06294324	37.5084705097678	0.0364071018462257
996	cg27530087	-12.1328490415645	0.447335114390223
997	cg14436909	-4.28602194699667	0.831359545090567
998	cg06198843	-4.3761531949532	0.887945521886499
999	cg16343995	-9.98931696943407	0.618834772265426
1000	cg00942814	3.88045366159265	0.786935383325223
1001	cg07812848	-31.8487037448587	0.104388253324197
1002	cg24457425	8.51123877165705	0.459312286724776
1003	cg10784146	-21.0566989975156	0.218767850514857
1004	cg06002705	13.8610091933712	0.405600448136656
1005	cg12120973	1.57288727609957	0.888141439636153
1006	cg19861048	-39.6312175403496	0.0729907722366181
1007	cg13587552	9.592535154347	0.416879606091935
1008	cg11229611	5.5409633647638	0.620954134362454
1009	cg06909630	-21.5529271581307	0.109607179528077
1010	cg17645946	10.1415540021998	0.510212950804115
1011	cg27651942	8.73720040526367	0.65267530201129
1012	cg15419710	-27.802108557483	0.0513076192518643
1013	cg00825734	-8.95703347118044	0.430352855877285
1014	cg22421766	-12.9350338747837	0.285489258144434
1015	cg24576260	-0.410377103886946	0.958046544484009
1016	cg21203719	9.26704290228519	0.437476532364515
1017	cg24852892	11.4037189855018	0.523104789851583
1018	cg22225577	-8.40585896876337	0.369708604939187
1019	cg10119342	-15.1589886858592	0.0793349835110736
1020	cg06679168	-1.34284369824575	0.888653982058082
1021	cg16995668	-12.0180434061263	0.131534884305585
1022	cg09870910	-21.8058967923462	0.0957826245072401
1023	cg25151559	-2.91885556696813	0.608404802476557
1024	cg20674014	10.3564065998961	0.265266971907469
1025	cg18224942	-1.77811060516489	0.735727879566383
1026	cg15683497	-2.30841449691954	0.794453381378627
1027	cg20978193	-6.78219705165341	0.135207009159227
1028	cg13681826	-8.07103648990153	0.243019664120089
1029	cg16380285	-52.9099234561847	0.0123509673211539
1030	cg15994839	-25.0415048178032	0.50043471049964
1031	cg21265287	-1.7080324118076	0.960469809657852
1032	cg02506501	-3.2307759307509	0.872421178855436
1033	cg14728174	0.690934631748576	0.939166854056563
1034	cg06818047	-2.67986217324464	0.549155935367153
1035	cg22161575	-9.07532778644497	0.20350769850568
1036	cg03003335	-2.11283114947731	0.57332255980579
1037	cg01937247	-2.71987638974293	0.70793987451287
1038	cg01515136	-2.87657749699977	0.499132834771411
1039	cg17026072	-1.6280937084872	0.9712180504717
1040	cg13452079	-37.9619051688009	0.0538529167797416
1041	cg10093859	-6.42529082456491	0.750600903016571
1042	cg25106100	7.21093994457208	0.574693015197022
1043	cg03001234	0.97437880549481	0.950124640422714
1044	cg27543922	13.0721289931905	0.742929430338341
1045	cg18163062	-2.51845154308306	0.842186044924619
1046	cg14529643	-0.727875228910539	0.920226531452978
1047	cg25021451	-5.49478548460977	0.800292661514717
1048	cg04584842	-3.79258536483539	0.808084342806143
1049	cg18538985	13.2774814847743	0.408857571688358
1050	cg19414302	-2.19818364257858	0.902894681221905
1051	cg22675767	-7.61664796335296	0.197229296421024
1052	cg06759632	10.1005337227547	0.639707925845992
1053	cg17405058	-0.875325059110346	0.972612069803826
1054	cg17712416	-2.41432435592815	0.790048115419727
1055	cg25203980	-4.65365784096132	0.703150806018293
1056	cg02953397	-0.924631378845528	0.917315322168572
1057	cg18565510	-8.04998594917572	0.569845579895188
1058	cg27185793	6.17571050666373	0.470334655945864
1059	cg09556527	-8.74335990532334	0.402745518354847
1060	cg07181952	-2.35867440028417	0.78137457339945
1061	cg22346297	-4.52109555447687	0.585367136308781
1062	cg23310884	-9.51651244023225	0.339050817987989
1063	cg26333156	5.57887806029466	0.832945849542278
1064	cg00262415	-25.397227502326	0.354435787760136
1065	cg27440283	-5.34565201783211	0.784975763191908
1066	cg00086266	11.6748989549449	0.680485775539947
1067	cg19323338	13.0209402461487	0.542158587738681
1068	cg24157952	41.2279745689529	0.0694994438446419
1069	cg15042692	7.5250499129463	0.809541781194234
1070	cg07425625	34.3817520561193	0.421060866081226
1071	cg04840417	16.2200392078561	0.530466905462992
1072	cg16887862	3.98383390638855	0.857009278295793
1073	cg25201327	7.28633120652625	0.854425630972111
1074	cg15868629	48.2377783589289	0.125797162419834
1075	cg27642349	-18.9281973113047	0.489700518829968
1076	cg26214604	10.9685793242339	0.6396302655686
1077	cg18224588	-24.363919847277	0.493169776817384
1078	cg25536368	-70.064710686191	0.0500569387052534
1079	cg00903892	-9.2024458829581	0.711105942184383
1080	cg14488957	-24.2567955416587	0.203085866383707
1081	cg06085743	-1.24567216731384	0.85754112271924
1082	cg05397202	-10.7421786985639	0.323286305517333
1083	cg23931819	-8.90705265219905	0.335940626169097
1084	cg02506753	-22.8145009709358	0.076831278646874
1085	cg05362521	-11.3215097882585	0.611521546958518
1086	cg05724097	3.68418849511302	0.712883126997719
1087	cg26369180	-38.7154929298833	0.0588599607884547
1088	cg19383909	-7.81565516104965	0.662743912059899
1089	cg26576041	-7.73129332249615	0.61644099143808
1090	cg11847126	-1.38087420724083	0.921565015085545
1091	cg15736449	-13.863991078996	0.49038140058886
1092	cg23689441	-2.38706680611589	0.902736386035232
1093	cg17709975	-21.2899765679429	0.258764400889069
1094	cg10435967	-13.3507338899913	0.394278449329204
1095	cg16712243	6.23346099084685	0.659271120234035
1096	cg08663263	-30.2943560646288	0.509270061079327
1097	cg07568471	1.88625049991358	0.936803774531556
1098	cg26931466	13.4213923679666	0.522412144736831
1099	cg26866277	-1.60431448958656	0.913432109661116
1100	cg09299774	-15.1464873164914	0.456512640003021
1101	cg10206052	3.07519938049972	0.838582177580924
1102	cg08939275	5.86897423215381	0.73180606190663
1103	cg22665280	-51.2660900938837	0.0117871023371238
1104	cg19585749	-11.0630857048221	0.234217630438126
1105	cg16527939	-17.2548672773289	0.0777636326221108
1106	cg04926200	-13.4730902511372	0.568795577539615
1107	cg12609142	18.7321118677212	0.117657645201665
1108	cg22130030	-9.93551112142265	0.455456768708585
1109	cg09862283	0.137839103770676	0.992975248328266
1110	cg15901950	-12.4199212597435	0.54020370229274
1111	cg12046908	-35.3714431592957	0.172966700430808
1112	cg26831087	-3.96301379556178	0.750393122351194
1113	cg21197375	6.51497057251283	0.814389036218612
1114	cg20236831	32.8728097884036	0.15200707698031
1115	cg13183628	32.1845244195047	0.502230147094306
1116	cg06038049	29.1630965327334	0.455949521076142
1117	cg17612270	51.978499921923	0.111465135640483
1118	cg22397910	35.6698145076408	0.429110457288745
1119	cg22125623	27.1073054077176	0.580189501355655
1120	cg19834486	14.5267429116834	0.601954443880313
1121	cg13649172	5.26908473836503	0.760522626711527
1122	cg04232698	12.4429272973567	0.227826367093883
1123	cg16855244	-7.48781818774598	0.41698054055673
1124	cg19827148	15.7661087055634	0.607232561676434
1125	cg05378358	-5.8731768527535	0.314054563229662
1126	cg06520508	-3.24128916014125	0.798127720383063
1127	cg17970390	-9.30825021596271	0.447326577276488
1128	cg05795376	-12.7536242204259	0.407063631881321
1129	cg05598010	8.24785237874225	0.360411064367293
1130	cg16255279	12.3235218039331	0.639587714851905
1131	cg22622472	-20.9888927785377	0.215860506315084
1132	cg16432326	-29.1141345918351	0.0426297598337494
1133	cg07394827	-4.77257716836889	0.827887044204043
1134	cg02625725	-18.2418218412903	0.263290229382976
1135	cg06599206	19.7743477996589	0.254689347310548
1136	cg16590012	-1.84317503214622	0.202223640520182
1137	cg22857134	8.60797599246296	0.00487669591710533
1138	cg03833995	-6.12361292060808	0.599266161253214
1139	cg20705390	-16.7698800467347	0.206650729068787
1140	cg04981007	-8.58259961414925	0.417832755684795
1141	cg16430279	-6.86999372378832	0.430504351987133
1142	cg15365642	4.86122726275759	0.640578411533242
1143	cg24252805	12.6260884103369	0.355088054850827
1144	cg14890378	4.7490274395914	0.731392805471926
1145	cg07346648	2.15609859420909	0.853802576811218
1146	cg08037114	-0.524843799839783	0.970041711722744
1147	cg04910752	9.51134503226655	0.492526391731069
1148	cg13246026	-7.92246630200214	0.421866307109884
1149	cg21396988	-1.17962879758427	0.935804958743423
1150	cg06802641	0.823271603609014	0.907891365223351
1151	cg03402404	-22.1226046053582	0.0314902464007061
1152	cg10065209	3.25216880272236	0.754724909473649
1153	cg08621441	-14.5124885769491	0.331201236094275
1154	cg18386618	10.4412262398661	0.405883380214466
1155	cg06395167	-20.052649796831	0.171956517425913
1156	cg16174225	-2.28584609317002	0.848879277321896
1157	cg00002593	5.96352612519267	0.507651439976091
1158	cg11808871	-6.96260306503801	0.596131276119624
1159	cg14911892	1.85465680091301	0.89524780328202
1160	cg08160862	-40.3447471174548	0.261494196402196
1161	cg26351554	-31.2782552250469	0.117839889653109
1162	cg24399111	-83.1017208768555	0.0175682646019131
1163	cg18024631	-9.06571600740236	0.659549641879327
1164	cg07313814	3.73708774596432	0.84153023903581
1165	cg11339519	21.128786437828	0.182605241206352
1166	cg00542041	6.35988331465522	0.852296638214939
1167	cg16575694	-3.78059185232226	0.829164345169784
1168	cg06646682	-12.5150262203379	0.414171406420415
1169	cg12072393	-27.4648078286217	0.157380771849107
1170	cg13494355	-13.4947360556983	0.587590355621189
1171	cg22376366	49.4642194729371	0.0944426919715267
1172	cg25203539	-33.4020037531565	0.11403006480186
1173	cg19898526	-20.1077192335043	0.233124734658949
1174	cg06649390	-19.2991128519607	0.392564350737056
1175	cg17748182	-11.6078602354056	0.586842164557647
1176	cg03465880	-51.1309685082419	0.314153544415293
1177	cg15462203	-4.53413768783751	0.842942842798236
1178	cg10556264	-2.71412200765913	0.871521311321214
1179	cg22709966	-7.12974459907961	0.616443348154561
1180	cg15976416	-4.87528235551173	0.630207772126922
1181	cg17838754	20.4880231930441	0.108765134423549
1182	cg09569143	-13.2511440329347	0.330924498069847
1183	cg13932473	-0.0784412431739416	0.995051582804282
1184	cg04119843	18.403008624462	0.459405898543626
1185	cg09236098	0.388556139513138	0.989867067951192
1186	cg05115545	5.38506239210205	0.891036364851384
1187	cg10164137	-13.8689379549313	0.572577094357461
1188	cg17873420	61.5960479561088	0.12803947880686
1189	cg21679391	2.63728106351444	0.229222146384104
1190	cg21118819	0.88615178759498	0.76175428382984
1191	cg03722312	2.36463370668349	0.628819887221712
1192	cg11414742	8.88060666561513	0.502666854976884
1193	cg15472728	14.3042696660535	0.144106550917448
1194	cg14270725	16.169837451267	0.0123985479314555
1195	cg15386434	12.1433183776338	0.0138356058630216
1196	cg16006120	14.8261127924277	0.000906579108342317
1197	cg14793596	17.6329580048675	0.0664699960317879
1198	cg07284273	7.67051277789704	0.334445390306306
1199	cg25063151	16.6243093357374	0.0717575483165191
1200	cg19436320	13.9608855080984	0.0511215471324152
1201	cg00040588	20.1579475700784	0.00133123905764817
1202	cg10482508	7.36323828457889	0.0830467536005201
1203	cg22691336	12.4629637346861	0.293368543200126
1204	cg27399052	-9.35065552120851	0.341172112704835
1205	cg12478066	5.6052782216106	0.678897950418178
1206	cg23036947	-9.09479725967404	0.333028398624552
1207	cg17132079	-3.0166418736664	0.663009036165267
1208	cg03397519	-7.25060406819763	0.42496590810267
1209	cg22273474	-0.559342003749174	0.920583712207657
1210	cg18550476	2.24600847355664	0.713598933642664
1211	cg00970622	4.98232506233725	0.579712775138261
1212	cg01198994	17.5038300633827	0.26025565102198
1213	cg23973885	25.968192773994	0.0250246978058974
1214	cg13393580	-6.82450875224604	0.579928911284753
1215	cg26108719	-1.76811615891432	0.859671735304901
1216	cg13354934	7.47105112259809	0.258492444541627
1217	cg20426768	9.39557698341944	0.331607083044345
1218	cg24153574	1.30530023280022	0.89617376258242
1219	cg23569098	-5.92047803815969	0.553943786833601
1220	cg21165029	4.68371805558304	0.604377696929281
1221	cg12915036	0.123683241130134	0.984452829097993
1222	cg03400623	9.42349281104163	0.191817095137842
1223	cg22109675	0.661855403167092	0.922601736496839
1224	cg15492552	8.01503399889138	0.328017990841104
1225	cg05572157	15.2711048373991	0.161514543574368
1226	cg18534079	-4.61293327492703	0.737679504423059
1227	cg00046914	-9.90417295102278	0.183160495187567
1228	cg02416993	-3.0576579038661	0.681697125254901
1229	cg07726485	-2.156425051978	0.872851898611555
1230	cg23377249	-5.74600256785529	0.634127078198781
1231	cg24356704	0.0347856748878534	0.997451989312052
1232	cg27503832	10.1008230047101	0.497010139714204
1233	cg22643873	7.07941051500031	0.55260178381899
1234	cg05397857	10.8801219454415	0.282617129372607
1235	cg05387269	7.28655510518196	0.224140482191267
1236	cg16342853	18.598544100639	0.159387820885192
1237	cg14992101	14.4951619115746	0.288460300858406
1238	cg09996760	-22.5359973022968	0.272205741930912
1239	cg09864992	0.630078979892317	0.974527487646996
1240	cg14094639	22.5622406105178	0.181239690400634
1241	cg06203720	-18.2822425338291	0.0467432331937998
1242	cg01508988	-13.7095780981113	0.263252988853828
1243	cg07395004	-1.01175694422274	0.967860245711059
1244	cg19871494	11.8720283212033	0.482882985817134
1245	cg09741074	14.7435953827483	0.516558745227309
1246	cg08433720	2.20947412805365	0.923614903434952
1247	cg21513204	46.9371033899757	0.129883552828658
1248	cg15604233	-14.6426859506244	0.548592426957039
1249	cg11915315	31.2051704348132	0.0755693302103703
1250	cg20048602	-1.80891116636279	0.858744065038721
1251	cg20439722	37.5769453745023	0.0236248451958305
1252	cg19823490	-5.63992376954018	0.742355909853312
1253	cg21478504	-19.5241118213635	0.23820711062245
1254	cg04615596	25.1698035841747	0.352013343530665
1255	cg05364533	-1.84969344676314	0.95870137239591
1256	cg15617543	-16.3303892288079	0.464467094755563
1257	cg18546249	6.62751407571419	0.70181246232787
1258	cg11552267	-6.67001336169966	0.560923330636455
1259	cg05589276	-0.793805108733419	0.958645538641916
1260	cg02144516	12.7697906428504	0.356708063395133
1261	cg20435334	-22.3041323657679	0.308669490052893
1262	cg26865478	-2.80369940745651	0.864226963017905
1263	cg16361266	22.1257511602275	0.22782498044869
1264	cg20434150	8.1705475843303	0.706259267218303
1265	cg08253842	-23.5113622864835	0.204581886936423
1266	cg14224772	-4.14380840756786	0.846300423254223
1267	cg03322002	-13.2529242993383	0.501337676346362
1268	cg08109545	4.52951547522446	0.315034915153404
1269	cg12033178	6.2821454071435	0.746356502004044
1270	cg08158776	-20.5821414815332	0.24341038246892
1271	cg04880874	-5.60944154237722	0.805893909511763
1272	cg15588177	28.7853497168524	0.349075457219251
1273	cg22232737	-8.93897953990242	0.679809479575084
1274	cg01006034	15.2059183119591	0.370101292550185
1275	cg23621766	11.8989060742227	0.652989159230615
1276	cg06903451	-6.18323438179488	0.77201952131133
1277	cg07284402	-11.8135416665006	0.415243001136818
1278	cg03774228	-41.9268052275838	0.0860161305326299
1279	cg23209302	-18.0954997573804	0.444961083806015
1280	cg01399319	12.6944146523344	0.63580069586577
1281	cg21264396	3.8127904120323	0.720440274461141
1282	cg19236733	13.7784874526538	0.449517292933693
1283	cg08647342	-3.71523147178141	0.806871670940557
1284	cg18087716	-0.227576470114073	0.983891156952921
1285	cg17014728	25.9926882538727	0.248265816280172
1286	cg04988279	10.4586360089529	0.210354801304192
1287	cg13323817	32.5521849571322	0.00339567096811564
1288	cg22389936	-14.7263234570987	0.284989931133881
1289	cg26303572	-16.5115978054827	0.534958824569076
1290	cg01648457	-22.7278336053797	0.224676645872793
1291	cg04481810	7.49718284264276	0.71553650735086
1292	cg11811184	-10.781893463455	0.601381405547749
1293	cg24837149	-5.51250009761252	0.407479719623234
1294	cg16278124	43.0512722937741	0.0723432333761408
1295	cg06817090	68.524038548968	0.0794768270141403
1296	cg16573386	-3.76757999543516	0.86783866020174
1297	cg17397377	27.3133973893588	0.0123857876952381
1298	cg08470185	-8.69106843190891	0.817206846263749
1299	cg13053783	-1.8774564528646	0.958248620860386
1300	cg22961467	-21.1325459343313	0.464305064831386
1301	cg15130241	11.8309913386663	0.698138628137783
1302	cg08791782	-15.3940197090037	0.635489893644305
1303	cg25842896	-9.00058602623253	0.800074556073282
1304	cg00173405	62.5760153142325	0.151062849069884
1305	cg03943717	24.8427286517821	0.379644256809633
1306	cg23437836	22.0388865212846	0.386912128535484
1307	cg00968800	-7.03443542124846	0.617217861452615
1308	cg08163912	-20.993124565938	0.289430013959037
1309	cg09064061	4.27257803060589	0.775107652127765
1310	cg04903146	-10.7389557949159	0.282315978402051
1311	cg24399028	-11.6473995086985	0.574229291949346
1312	cg20383673	13.6026325599598	0.532240177317637
1313	cg14795268	-5.42952564741453	0.42675331598427
1314	cg11431291	-1.74519243941104	0.778925421188632
1315	cg21439539	97.9293598113687	0.0356429747425794
1316	cg20275133	-25.1680567375824	0.210865601768616
1317	cg16728516	-4.76514201666255	0.881578933034165
1318	cg25769755	63.9163303864948	0.177326563874691
1319	cg11993086	0.564495841399785	0.983070840196242
1320	cg26509139	27.0498637792938	0.0983494211308263
1321	cg08387662	10.0549481308851	0.0357571916066841
1322	cg05595602	40.131647579923	0.264052664043316
1323	cg25397779	8.01873330420215	0.794413305469096
1324	cg04230662	11.5177925187399	0.610107512555167
1325	cg12525514	-10.5912203974368	0.260591730919012
1326	cg25939543	-19.1754663507248	0.408535338894827
1327	cg16661858	-9.72302298666067	0.297681691700565
1328	cg15863361	12.0638877575045	0.531460047710122
1329	cg00009834	17.4702385127577	0.233872482287204
1330	cg27295412	-8.87500314900244	0.601452811218295
1331	cg00294152	6.98735657028776	0.255765910755529
1332	cg25228593	-11.1262742972632	0.306945416025999
1333	cg23359932	20.7693052960817	0.281907345714829
1334	cg00060374	-4.38226333173926	0.332688429470601
1335	cg17507949	-3.26989652071047	0.665568154649601
1336	cg22827694	1.7818626530634	0.881726193901906
1337	cg23894219	-3.82621291326394	0.706378844909095
1338	cg15633699	-1.91561527637	0.848096243879706
1339	cg10380643	-1.24863953117833	0.901555429189517
1340	cg20598347	-4.12062000035583	0.604596462695744
1341	cg02668764	-4.1545562172892	0.618164653927812
1342	cg15081886	-2.75753850580023	0.788833927546802
1343	cg23537515	-9.68924872900202	0.4001156719097
1344	cg12754273	-2.72352640811802	0.789672214455028
1345	cg21281527	-18.8929542835818	0.154737141945245
1346	cg15823872	-13.9529918459602	0.28970965044054
1347	cg24555071	11.889752453409	0.382943899612174
1348	cg12286462	-19.6934322446241	0.240672721061047
1349	cg01721822	-41.6760385811002	0.0187124437749033
1350	cg21285198	-5.89292336000846	0.594024382399003
1351	cg00305774	13.537993963058	0.521810732432712
1352	cg22517356	-0.66698969475209	0.922342462902573
1353	cg17265051	8.07531977653868	0.298012080194574
1354	cg23795938	12.4402390219723	0.272421754388367
1355	cg10156298	11.8392890658396	0.121163216478265
1356	cg09368716	13.2569836301249	0.0441602015045813
1357	cg12208770	12.1652564183902	0.181299269989227
1358	cg26863172	6.61803011919266	0.167004643162287
1359	cg13169132	7.6050444231882	0.0396329669349693
1360	cg17142722	-5.76910691222374	0.822649876279349
1361	cg04897188	-4.57976975231159	0.73904173059968
1362	cg07010566	-1.45517264981865	0.88503156884066
1363	cg14902621	0.48802526607799	0.977786567889881
1364	cg26373274	19.8830327519502	0.137196581223
1365	cg22351666	21.9753806305189	0.132841861388173
1366	cg05235651	6.50414015798698	0.421086913544572
1367	cg04865726	10.7878509016107	0.0460311157301629
1368	cg04384590	-23.5434463080521	0.118921868430042
1369	cg19071098	-4.72641300963557	0.664087812923762
1370	cg08123463	-18.1359565579627	0.263404777541145
1371	cg16496742	-28.326107447946	0.0712432372243435
1372	cg26394870	-3.05315490074444	0.497616397693228
1373	cg19270739	-9.48786823257995	0.19776750464962
1374	cg21837069	5.51309928318139	0.530927974960917
1375	cg00702126	10.49509585688	0.367777090523265
1376	cg14667273	10.8987345288005	0.51912153405233
1377	cg27391934	-10.6344225947606	0.475122464696126
1378	cg07898743	9.90301152650232	0.497508730279141
1379	cg20138749	-1.2637451176629	0.933222861267431
1380	cg16784215	0.0457586552476195	0.995174989359572
1381	cg07232890	-9.79613425213943	0.432476745166491
1382	cg08589721	-10.3829604649227	0.472173186651276
1383	cg14271665	0.288450203781625	0.990392476624879
1384	cg02896318	-8.77847387272404	0.63282361467555
1385	cg25234611	25.3248639293004	0.204837478938094
1386	cg09668627	7.02312673155964	0.271463279347149
1387	cg08161163	0.665719975415446	0.961276728771828
1388	cg26798702	-14.5052753265045	0.276156925708812
1389	cg09843049	3.21471510530239	0.789723076459702
1390	cg20255272	4.3247559024615	0.369974041776401
1391	cg13897675	12.4915841806117	0.613421257916165
1392	cg09860601	11.602639958424	0.287558793952393
1393	cg19639479	-3.28745795452913	0.847706855037385
1394	cg09603935	26.7043279247034	0.309600090319322
1395	cg03116557	3.9788703457787	0.733709511134633
1396	cg13570957	-6.36076981848366	0.691892933568366
1397	cg26795248	4.70095653807179	0.656229088578529
1398	cg25592215	-12.3325469095964	0.555680070509287
1399	cg08426733	-24.5022891030992	0.13416978208668
1400	cg08270205	18.7062475476185	0.474059805880477
1401	cg15099879	-12.8878307619935	0.500897452991141
1402	cg06786804	5.10171007048822	0.734359547950599
1403	cg24492273	30.169869267082	0.154234008387019
1404	cg00929633	-11.4858973334321	0.219000959833368
1405	cg21001441	9.83883544376652	0.427015627443546
1406	cg12841328	-5.33543666969724	0.577009087115047
1407	cg11405695	-0.412259015893182	0.97059824441547
1408	cg02136596	4.98876971558411	0.412184385125659
1409	cg20219069	1.35453756692337	0.931036630153944
1410	cg00599812	18.6718829099632	0.0536625607095449
1411	cg16669201	-19.2768961864774	0.350442439884717
1412	cg00528453	19.5607152953779	0.2282869040713
1413	cg23319365	0.0801358761750075	0.994438626666198
1414	cg27383362	2.68577100195578	0.867790122435631
1415	cg26182712	2.95604801323624	0.769531062896207
1416	cg15310231	7.29464400930737	0.420550698479538
1417	cg27564386	-12.5099516674126	0.54604025180127
1418	cg26651722	6.07256381841479	0.635263386955006
1419	cg01521567	0.398419142592542	0.984414579779216
1420	cg03760226	0.667381632624284	0.977860587636739
1421	cg20985028	-8.08436388357938	0.555480538163656
1422	cg19682639	-11.4264712331945	0.371366961494338
1423	cg13388025	6.88956638662862	0.555021150310072
1424	cg05894629	11.107099233397	0.117529588399355
1425	cg26226110	-4.30365522647422	0.499849091008762
1426	cg07280242	20.3982533291266	0.0515022903822956
1427	cg13798621	23.4948621560882	0.0117826415783225
1428	cg23016632	22.2487720989202	0.0200974556006734
1429	cg10972351	1.33734978418316	0.926440347853699
1430	cg20951194	0.898002214934098	0.957370381740241
1431	cg04107003	9.5116328689797	0.368641704037506
1432	cg24085570	-31.029756386324	0.0849781277164702
1433	cg17282836	-13.3849388072939	0.261333825757455
1434	cg10522845	-29.4132724133158	0.0476850534513758
1435	cg24687970	-11.4247868930972	0.297805421712517
1436	cg25101405	-3.73952559798507	0.678866409964934
1437	cg04981940	-26.8640083600454	0.130683317352737
1438	cg17821649	12.4461681008488	0.139288155051629
1439	cg00391668	4.11592256049524	0.646344074606377
1440	cg19621710	16.3675720950124	0.125315057234725
1441	cg03742705	-1.80858458363537	0.923981630826299
1442	cg16013630	0.301967525765129	0.98119402553167
1443	cg25210378	19.4625558386086	0.108404466666704
1444	cg15875062	14.8002018768091	0.541573697719857
1445	cg10228629	25.8536387663494	0.305143873485449
1446	cg12723840	6.20300658721888	0.526228030001046
1447	cg06377929	-9.76955530440607	0.536036868335349
1448	cg07490279	12.7807671931587	0.769398326466526
1449	cg10240778	-8.69007029807212	0.82171115693601
1450	cg03041700	12.255958835314	0.589006569255333
1451	cg12909536	-35.3469425907994	0.0666905816679707
1452	cg12439834	-26.6632283317125	0.0568678238655842
1453	cg02188411	7.2175732502473	0.318845566114312
1454	cg07478007	3.39546695609678	0.755700227926463
1455	cg01768480	9.0083595502838	0.560595191537986
1456	cg23442023	-2.18746108274087	0.888764851099361
1457	cg22306974	4.5163362212879	0.851430260103861
1458	cg26317581	4.78755346308201	0.329602345927845
1459	cg11735371	-8.9155589137686	0.607010696721059
1460	cg00695214	12.8477417287855	0.572336609652098
1461	cg21094501	4.06732710999426	0.83541041147234
1462	cg23735749	-4.85813974932571	0.807376179929833
1463	cg13352563	55.1340039713807	0.028988680558616
1464	cg13025553	-3.63319931508047	0.847425980019988
1465	cg20157693	-3.97298607928558	0.857673358723439
1466	cg18040125	24.2991471802833	0.107768303027013
1467	cg15466030	3.60683991450159	0.853917164798026
1468	cg05049094	-11.6471893501753	0.567206347717462
1469	cg25628057	10.1712161762359	0.66156516234837
1470	cg23236382	11.1328883259804	0.496549001928016
1471	cg24378791	6.64502339909183	0.709512208781404
1472	cg26042514	-19.634881628991	0.527912157475995
1473	cg15688683	-2.91882338660212	0.548285404090234
1474	cg13671768	10.7697411111849	0.588462632258647
1475	cg16494896	1.27868456340196	0.939278757766169
1476	cg06866635	-37.3456698094407	0.00803951858573554
1477	cg18387631	4.56374894480393	0.851106744744692
1478	cg15101273	-8.9878949826995	0.537075993242427
1479	cg10108196	6.11460803722495	0.193360498815567
1480	cg25201541	13.9026810763551	0.122913544002889
1481	cg24296621	22.3550519075814	0.045548979077414
1482	cg21797898	8.12754907887141	0.427993591403514
1483	cg09932694	19.6896924021782	0.297102495533425
1484	cg17464271	16.7253504344071	0.591930220804574
1485	cg11103442	40.4392303763538	0.225916106110835
1486	cg22225258	8.6568092064665	0.828911186153975
1487	cg20230657	-37.3617396998469	0.198501053313892
1488	cg08376055	37.1433530981917	0.142561106979816
1489	cg12648677	-101.598616551734	0.0132089936323901
1490	cg06128920	80.2565949094991	0.0123112286094052
1491	cg21124756	-42.1729272302093	0.183813765564332
1492	cg24729577	50.8542006257542	0.315864194909451
1493	cg14651254	22.2549720855112	0.204426799502836
1494	cg00088251	-1.44630766442035	0.840201229369848
1495	cg11856308	7.0307235159956	0.583154557039898
1496	cg05947649	5.09108630856847	0.735796765030002
1497	cg11794959	-16.8443374125705	0.149636617523133
1498	cg20627546	6.11928684458052	0.723477098083185
1499	cg11722969	17.6779987824383	0.387036661377725
1500	cg19517490	-12.252933807987	0.647764150526013
1501	cg13321900	-5.73257120817229	0.725440479383387
1502	cg06793307	-14.2934642956318	0.507061773479951
1503	cg15160081	1.76651269240511	0.967484027904341
1504	cg26536460	38.2880457717293	0.127639791316091
1505	cg17498856	-7.94741801085251	0.862411544664112
1506	cg15481565	-36.2409634087978	0.0842477454973674
1507	cg17848002	-4.66597141525229	0.813551798412671
1508	cg10712902	12.5297548105087	0.415490311168013
1509	cg17590292	-32.475178746515	0.236638640924937
1510	cg14395520	-3.10873133928842	0.884632373798124
1511	cg15153800	-17.7630592254901	0.422840736068822
1512	cg06839383	1.59333017180852	0.411764983069493
1513	cg24466671	-4.42261649269067	0.816089623881584
1514	cg13893866	5.52631930188136	0.560682703810091
1515	cg17445140	-45.4521497040004	0.0606529431915847
1516	cg23933399	-5.31811153603315	0.899932019923045
1517	cg19768036	-39.6715079158731	0.0328320079674375
1518	cg07808701	-21.2885892174394	0.322490676313281
1519	cg20675251	-13.0775928783874	0.364903022294374
1520	cg17271658	1.94999835050655	0.921477371553303
1521	cg20681653	-6.88282640805723	0.454002563390866
1522	cg23590525	-20.4003808401274	0.123489389919826
1523	cg09259608	-3.61822784731381	0.731419216071472
1524	cg20958600	11.2409856587388	0.494844681466115
1525	cg07835437	27.051843640613	0.155852503619968
1526	cg03041030	2.0625942173791	0.807959575009508
1527	cg12983196	-22.8468580189362	0.256007635088907
1528	cg09151801	-3.31693191810477	0.808417045776067
1529	cg11526073	8.80123238036918	0.503294440061602
1530	cg15844005	-10.9193549239335	0.600610679815822
1531	cg27301475	-30.6751322082748	0.0420897857317037
1532	cg06205922	-11.6141393625879	0.70697212971672
1533	cg01536190	-22.7989615691897	0.211623533504761
1534	cg27047577	55.0423906278821	0.110170116934412
1535	cg14434115	-15.9981726707369	0.510059814758781
1536	cg11917182	2.26351291097728	0.891372979995213
1537	cg02068237	-10.8115902737842	0.616070499867115
1538	cg12270813	16.0908595018387	0.565831313886014
1539	cg03724010	-40.2528732686429	0.0660863368355867
1540	cg13804574	-11.452605166494	0.514719286190526
1541	cg16037137	-8.76335699168169	0.688755122039715
1542	cg12632610	-6.12007446858356	0.634592519917119
1543	cg16001723	-4.06240623402765	0.836444846551728
1544	cg13850380	8.82999428798298	0.210842014421967
1545	cg00813378	6.78755900531559	0.144988724765378
1546	cg08738570	8.43187785494323	0.0541133588288608
1547	cg22497741	1.21954573163635	0.959930015869147
1548	cg16306898	42.7072030818505	0.119860633104256
1549	cg16601494	-7.85481665611323	0.761889775224365
1550	cg15487867	11.8308654485101	0.631286088589713
1551	cg18430990	7.33064904126484	0.335972329364061
1552	cg23244095	-0.320497438576514	0.961579781071231
1553	cg18114463	-10.7865410027076	0.594423329562133
1554	cg09612202	12.0664547430811	0.433520076180589
1555	cg26602477	-15.9086363435656	0.457313473733674
1556	cg11811409	-17.8970035147371	0.324549678220694
1557	cg26690297	18.3400441562867	0.362205050538065
1558	cg08757091	-19.7572615713998	0.346513651783828
1559	cg08464374	24.4693026271981	0.402853911583904
1560	cg01802295	0.385553752667737	0.978204035197697
1561	cg13575252	22.7234429151363	0.216951555966357
1562	cg19619320	-4.12571569257885	0.84604962019951
1563	cg11964810	-4.73054929759538	0.501245507719118
1564	cg21173317	11.1319729492179	0.733762394375225
1565	cg03392564	-9.15356467811576	0.850084190902143
1566	cg00955674	14.5524159350654	0.321609067364024
1567	cg03941625	9.10388725553253	0.692726921698713
1568	cg10347735	-14.9389371435041	0.420024030412981
1569	cg05426853	-3.44898638413261	0.803480488267263
1570	cg07945460	-17.9834983084294	0.075176330844621
1571	cg07381470	9.52441530249711	0.336227533545497
1572	cg24470133	-7.60666777097021	0.597142128140595
1573	cg00355315	-107.332628956423	0.00274263400958481
1574	cg04349378	-1.17131259459016	0.941559378258204
1575	cg12734710	-5.1450144059317	0.64401184416833
1576	cg01058717	-4.037453016095	0.872426603037155
1577	cg14194384	-41.1276845808789	0.00492855698213035
1578	cg16305094	14.0999668742057	0.347058388435813
1579	cg07229301	1.02335282915076	0.955112116227166
1580	cg18312113	5.53427670282706	0.658380020373934
1581	cg05888763	-7.41675745504788	0.625968555079705
1582	cg07426077	-19.4720332133305	0.370823611633462
1583	cg02871542	1.19887191916492	0.901621491475481
1584	cg22373622	-21.5138649300339	0.223613717897614
1585	cg26908276	-18.5094127418847	0.228320971538392
1586	cg06069740	25.6227417081837	0.191599634444835
1587	cg09073059	47.8928673103964	0.29618177168075
1588	cg16277776	-24.7442025712874	0.374779738640124
1589	cg07211239	-34.6771391647991	0.0272196042874753
1590	cg09517190	-6.78772733862871	0.567428292914264
1591	cg08140609	-12.8061995875578	0.318961236857435
1592	cg20140735	-0.608975046667666	0.938992890167387
1593	cg24044259	15.8845855097426	0.249791973305248
1594	cg18368516	6.48734484179982	0.798654247544317
1595	cg12062537	54.0976525704302	0.070014349167776
1596	cg14442715	5.53060727836073	0.777860669218841
1597	cg19910128	31.0691524187249	0.133905204625485
1598	cg06089960	13.5480745856505	0.552612480935134
1599	cg17968925	12.062412958169	0.506419214229417
1600	cg03710092	4.73923363496345	0.802246752127479
1601	cg13431342	-19.7206496769502	0.350767190266286
1602	cg08947289	-0.96137654419682	0.954598990420939
1603	cg20490900	-0.0722440816126304	0.995242768180436
1604	cg04218845	1.99195036404485	0.866863405996368
1605	cg00784654	-8.33026172844947	0.451346939849416
1606	cg03309758	7.55767460327475	0.58495342927203
1607	cg12690016	39.5438154078712	0.0209850926226976
1608	cg25018209	-20.4729226910445	0.364679169944843
1609	cg11586519	7.43149332378901	0.564193525033618
1610	cg05181565	17.7910333974246	0.251303521874125
1611	cg23443459	-3.66038885840553	0.923119291826539
1612	cg04637864	51.3460198831539	0.11520894422835
1613	cg19158176	15.713383445007	0.691666428609178
1614	cg13424097	41.9274754265846	0.0250475427031815
1615	cg07090025	-5.632235741778	0.819048748882274
1616	cg06199750	18.8538187747186	0.48664081923168
1617	cg05433637	12.1867401254257	0.487860397375823
1618	cg08271362	-31.1511465964288	0.269491845829573
1619	cg03528848	-10.3287490521818	0.461034909244272
1620	cg20755353	-33.2595019949548	0.0886882680937963
1621	cg05338320	-14.3650862807948	0.0645032011915009
1622	cg16848272	-6.27988877066955	0.260248838254916
1623	cg04652884	4.19714391351778	0.781552149566069
1624	cg14279825	-12.749782476578	0.372336482493155
1625	cg05702207	-20.9703448767077	0.265905674269122
1626	cg00151676	-10.8659032140324	0.687775791798687
1627	cg13316116	-6.54102156965834	0.572846248689498
1628	cg05934012	2.42342911983814	0.914431405691438
1629	cg07479014	-12.1528963630224	0.403015295405885
1630	cg09126090	-5.07358155649962	0.553862158484507
1631	cg16358446	14.4250601899333	0.611833038726171
1632	cg08289140	34.1882811492307	0.257637470047873
1633	cg11521998	-20.8412147337252	0.0677034574739658
1634	cg09172260	-15.0285791568025	0.146276242707408
1635	cg15158067	-16.4176536857048	0.238898320525522
1636	cg21240031	-10.2990221877238	0.498223444010377
1637	cg26680206	-22.1096233393212	0.389428125860958
1638	cg15034659	29.2942348254374	0.194257079226409
1639	cg11649182	-6.78901035686254	0.672001724793189
1640	cg25311963	-4.77564869427358	0.609202856378827
1641	cg07147033	-2.94723488787114	0.572113771765704
1642	cg13897348	1.99931719876475	0.727779964901516
1643	cg19246761	5.64169370764962	0.501170501707122
1644	cg01229567	3.71144064461121	0.655195492418679
1645	cg15817635	-10.6230229670159	0.393401398585308
1646	cg15652741	3.53356000093256	0.8371409425998
1647	cg10705488	84.2009218694957	0.0366902393470494
1648	cg11140595	10.8187139595185	0.775845798122779
1649	cg06761793	-23.2177167195365	0.606768207926184
1650	cg18123911	12.3410152116263	0.758206353026088
1651	cg17271960	55.703835836594	0.136927172636866
1652	cg25004270	5.17344548621144	0.758418448781812
1653	cg25880288	15.1154477851165	0.642401203336027
1654	cg08912129	10.1406079322522	0.779576039647536
1655	cg25164153	-0.912151090511392	0.97851589150804
1656	cg26169249	-10.9980892637259	0.797872342622547
1657	cg07807975	28.1569130927914	0.302100338537883
1658	cg25010770	14.3318486172318	0.616958173045154
1659	cg10756715	8.30844871553841	0.669966672308479
1660	cg05941212	-1.71008800531883	0.898156331532537
1661	cg13947830	4.42086040679258	0.707261865306547
1662	cg26295592	8.06903013790516	0.552806583167951
1663	cg00781053	34.4801093698885	0.171723234626295
1664	cg23605175	54.5055056980721	0.00598747860516234
1665	cg15369276	-3.52473325065842	0.857234958230015
1666	cg25459752	-20.246969248492	0.207459999270751
1667	cg15558634	-28.4285981950101	0.343238620247954
1668	cg10970349	-0.661564361629807	0.790836776368763
1669	cg15323084	17.721948465218	0.136595618645541
1670	cg19165249	3.00630616780056	0.887879099610478
1671	cg09082814	-18.8286803609085	0.211338193429527
1672	cg23957653	-7.62467875437468	0.463283458643412
1673	cg09061216	-8.79141100393628	0.632009450023114
1674	cg03975652	-7.48722319357049	0.577015698471399
1675	cg25500853	16.6538986554568	0.484452022462803
1676	cg04292080	-28.4706125870124	0.0860886053524571
1677	cg17456675	-5.96461714433377	0.73013076928159
1678	cg24090393	9.24496689459142	0.681470959201516
1679	cg02492207	0.531332649139759	0.970762397376788
1680	cg10994397	11.0139455500945	0.567123922602935
1681	cg22689324	3.50337966359947	0.697848258142174
1682	cg06002660	-5.72341996799067	0.668791429895593
1683	cg25900627	-4.51003068972653	0.748766107783763
1684	cg04854189	1.29845537709595	0.922681989757561
1685	cg06912282	-8.45206510404098	0.476192729896514
1686	cg06080300	-2.56412495403223	0.790513489641071
1687	cg09159050	-22.0019954998936	0.103147461815126
1688	cg21129534	-21.83735782426	0.160519624328939
1689	cg00078456	0.53676937736444	0.904945386161848
1690	cg18852096	2.1992644844115	0.680640680912208
1691	cg05642789	-0.846999081073173	0.83855324324072
1692	cg01621974	-0.190633170688258	0.968931005150798
1693	cg17122213	1.26349020373985	0.713401314982744
1694	cg03427058	-1.00923713978952	0.810431547193534
1695	cg23430652	4.58459786904004	0.433068772357819
1696	cg00297832	2.47936795411347	0.633929655560309
1697	cg24368383	3.25392925374326	0.866239582347252
1698	cg04882394	-10.9969196894332	0.490027253293089
1699	cg24535439	-8.6170421948805	0.45672554683277
1700	cg00262621	-14.9187026451501	0.152906492905994
1701	cg08231710	-7.65722095519405	0.356129604356163
1702	cg06943420	7.33708062790969	0.438831756612522
1703	cg11648594	13.2987069825087	0.226367708059691
1704	cg26740494	-12.660016229014	0.1252341990718
1705	cg05834878	-4.06172555605594	0.767213203074841
1706	cg26976576	18.9362707604711	0.267694251653863
1707	cg05419999	7.50388126853249	0.695326286352638
1708	cg11798909	3.41540755830929	0.744313375877141
1709	cg27541892	3.95403020978135	0.055088531714931
1710	cg21921584	36.0683307921241	0.0362183375542157
1711	cg26660744	-21.8487084072075	0.273563336001918
1712	cg10124011	2.73890763914231	0.842777009266565
1713	cg00595856	-10.1653851427401	0.611136879870139
1714	cg23252997	-5.32437387713583	0.722833404658014
1715	cg03484489	0.959557537134082	0.92956126847524
1716	cg16673286	2.55105037955014	0.27801934394205
1717	cg03388431	-13.5305181049479	0.487214133124351
1718	cg17450090	9.40956653688769	0.204381546057946
1719	cg03939105	-12.3005011632421	0.0328755953708316
1720	cg15126211	3.92806957043944	0.912244468358041
1721	cg00998168	79.5578944991153	0.0138228595767552
1722	cg18282011	16.2103830139792	0.476206127413961
1723	cg21149807	-30.3331168149624	0.366970474671113
1724	cg09283376	55.2007137123769	0.028823774256171
1725	cg20155988	10.5763049150538	0.722596090135663
1726	cg26562592	30.9980956126949	0.359981597225039
1727	cg08864381	-48.9596254622933	0.283963111093684
1728	cg03017195	15.3601663715218	0.563960537199352
1729	cg15830572	-25.4003007789391	0.140340181450991
1730	cg06848468	3.51932038159753	0.827071390518153
1731	cg20255817	-55.5430404324532	0.313377736218312
1732	cg22082145	90.472210523571	0.00192338139222147
1733	cg07601058	-22.9899830866263	0.34886455802401
1734	cg23210533	15.2521731078484	0.409247403061021
1735	cg11809915	-0.164373267991009	0.985437385232295
1736	cg04105726	28.5652648439871	0.265441184473219
1737	cg17869988	-8.9253714870918	0.635942125757205
1738	cg03718254	-51.7727428546854	0.179365182678218
1739	cg20106035	-7.42717214661219	0.755847527121576
1740	cg14626671	13.5649587467031	0.581084348580151
1741	cg19382808	31.4342553061325	0.107882554029485
1742	cg11530028	-7.86308504676682	0.550498475275192
1743	cg03972505	-5.34070367300538	0.71779760947762
1744	cg06528340	-11.9230655474114	0.407733612675694
1745	cg13077472	-40.987257572993	0.0205567096484213
1746	cg17939059	-1.79001972590609	0.929747946645176
1747	cg18288914	-58.0943961812679	0.0142662340400391
1748	cg03548463	-22.4900426016902	0.293446388950998
1749	cg09330116	34.0238491203206	0.0965779581920096
1750	cg00400654	15.2060744815196	0.315643891521382
1751	cg04272838	-5.01207313798188	0.862827169922148
1752	cg02915803	-7.47167411881096	0.548888921640869
1753	cg26932054	-4.11151289624179	0.811449776777948
1754	cg16990083	21.5189926151682	0.426432893288706
1755	cg12655137	3.56850578440089	0.49082384899676
1756	cg20251225	1.49912983968843	0.752726350830674
1757	cg20429981	17.343061922993	0.0387086486541459
1758	cg01189072	-4.13039540682123	0.652822720343073
1759	cg11588584	-8.17355543342722	0.648176417358962
1760	cg09825670	30.6109791139301	0.154966798160102
1761	cg15079481	-5.14508695319796	0.593519381234324
1762	cg20462449	-8.13536945675052	0.577505868723794
1763	cg21106418	-1.63352711976114	0.856841381442243
1764	cg10065215	0.694337672835351	0.983806160879337
1765	cg12042834	7.8675247958482	0.710904644866417
1766	cg14976190	9.18175562341855	0.444386419177284
1767	cg12135548	1.65342502898713	0.780855602265108
1768	cg12100965	-14.8457864975414	0.696543174127541
1769	cg25414858	3.43542201632862	0.871438179785523
1770	cg05972376	-2.35953799114049	0.681085285331406
1771	cg19018051	-3.726629570826	0.694036180280514
1772	cg13440958	-10.5603944320584	0.181231292928248
1773	cg26114076	0.560645829119545	0.97457131226173
1774	cg23231093	-3.97189005149204	0.744890665853559
1775	cg04437922	13.3848019676392	0.257654720609395
1776	cg24688574	5.65598922412053	0.728118776653543
1777	cg00341415	9.30069313368395	0.493582539443391
1778	cg06750152	8.44168914082726	0.542242549846738
1779	cg10626236	-10.8731093420621	0.304676728483642
1780	cg27169263	7.23083543593257	0.825516518707074
1781	cg12437380	-18.2587302594394	0.313909000339189
1782	cg21932190	18.5141271541043	0.118669398508509
1783	cg12398752	15.1997076307668	0.365471709455315
1784	cg05364761	-31.2896574654115	0.193334956589191
1785	cg15942579	-9.66344139988848	0.434525332517546
1786	cg00853237	4.18472566707954	0.823044024530339
1787	cg27047637	28.2417625376625	0.112654631585917
1788	cg12048375	28.7747148507948	0.0848610286095525
1789	cg25189483	52.9387448884304	0.00811367840140767
1790	cg24933755	14.6613674157966	0.406561452064214
1791	cg11851198	-2.1436840429751	0.860144668045057
1792	cg23611477	2.61842320701688	0.157959851287132
1793	cg10628909	13.516555043414	0.479457536061853
1794	cg20871579	23.3616450801595	0.102950896608869
1795	cg21906539	-23.8781241129927	0.00174089695926715
1796	cg16248785	-6.68196230395216	0.838967656103612
1797	cg25558285	-2.16185971709066	0.934127015632329
1798	cg00062592	2.25603557683743	0.939014792762503
1799	cg11198222	8.51944523608	0.810634479062688
1800	cg00669623	-25.9837152550888	0.356885632891802
1801	cg25253065	-32.5345461172215	0.140555689612082
1802	cg03009233	-2.40526075240588	0.906216057842601
1803	cg04243582	34.5595466364944	0.170170587221239
1804	cg15176125	-25.1500355180396	0.0276433933969971
1805	cg09353726	-15.8074710065384	0.23991983228618
1806	cg11572942	-20.9042232074101	0.131703291550552
1807	cg14164956	-2.85937651654091	0.889962891166945
1808	cg12833102	15.9333134621471	0.23720714027177
1809	cg13441524	5.37906508896917	0.099197281897573
1810	cg01677809	-15.2089097289266	0.243046166247608
1811	cg14054781	16.0410374159534	0.326885275426321
1812	cg11987751	-5.23369700025177	0.71293672537702
1813	cg10162318	-5.59311598076164	0.707024730656191
1814	cg07808326	-21.6286728445054	0.300338730725728
1815	cg16324669	-9.51627110885536	0.662258945895715
1816	cg12213037	1.57846732434396	0.247590317219324
1817	cg20620652	-7.14505234549175	0.590680808790491
1818	cg02332863	9.18765696660629	0.631225282757939
1819	cg25887748	-4.30524043176518	0.801240635253494
1820	cg04087434	-19.1999592673201	0.492500326203243
1821	cg13866156	-15.0706405223966	0.429786763030957
1822	cg17456545	-22.80563463398	0.139810132263017
1823	cg02934509	-26.2277456404727	0.275759732527118
1824	cg27391816	-0.425615700618946	0.931079745825225
1825	cg16990280	-16.6687389086835	0.0106402472351004
1826	cg20597714	27.3845216537024	0.334858167685532
1827	cg23983334	72.0903657992873	0.0278438267134942
1828	cg22824366	-7.49149301887369	0.659409322600432
1829	cg22464455	12.3578557332044	0.608591184842994
1830	cg13849007	-47.2202088804569	0.135719434864032
1831	cg25394461	17.4491274342272	0.348161990378716
1832	cg04789860	12.5092324452488	0.534591533910803
1833	cg17990871	10.5534692342951	0.491275361021366
1834	cg01512113	13.9409217935333	0.226215330311565
1835	cg10515720	-3.82599974795789	0.791817077018717
1836	cg20999797	5.28487415749823	0.811628242794062
1837	cg14018698	2.58158921247268	0.87384980246362
1838	cg18763089	7.79890464488046	0.625878942033415
1839	cg14027380	-14.7997791385894	0.221122335406345
1840	cg11163532	-20.520524565644	0.40348649521657
1841	cg03386811	-2.85813677732094	0.911395235058525
1842	cg22707691	-6.08089952207945	0.810555848220547
1843	cg10317445	25.3142856938528	0.392877496282461
1844	cg21580588	-46.7321622184839	0.120100782457343
1845	cg15260978	-18.4886691227592	0.30880517016885
1846	cg12406875	-15.8107827217639	0.375718206063316
1847	cg05983502	-21.2485859315823	0.24320298707198
1848	cg17282211	14.4936820145768	0.449604378922338
1849	cg27433479	20.6359561539855	0.151798224277653
1850	cg26342907	-65.994609183752	0.0369361559615806
1851	cg11725331	3.45280395063896	0.843853588039232
1852	cg07015961	26.0577731580462	0.104616333077468
1853	cg10543797	11.7129953326909	0.46418425515722
1854	cg18947110	25.6957434614265	0.208496770383257
1855	cg09233730	7.58717079305818	0.725895247245455
1856	cg15688635	-23.3783461953359	0.319591645277277
1857	cg17010445	0.0389753368103252	0.998134840207608
1858	cg09185911	-8.90976448835327	0.388621538026227
1859	cg25031205	-15.2513080030878	0.563890647092966
1860	cg15578948	-2.03129069675877	0.947947186458585
1861	cg04439557	16.3614150319915	0.141310191644784
1862	cg08122070	13.6217150010258	0.0773697537639665
1863	cg05152432	29.9459211715774	0.144423784003108
1864	cg07328316	1.49113559995995	0.808806674599584
1865	cg22906442	-2.452905410454	0.689827582077231
1866	cg08937102	4.78242778620467	0.541500158844099
1867	cg15274273	4.31336245505309	0.579769177866618
1868	cg11296110	-17.5732275044927	0.109880736530569
1869	cg03606098	3.88707767123454	0.60853970155125
1870	cg18956079	-4.91092075399872	0.702229513585641
1871	cg12552303	20.2715666722962	0.235658561404577
1872	cg00423114	1.78681574674096	0.936535119221995
1873	cg21692735	4.34039305772196	0.847496339152896
1874	cg23159992	-6.23388548120892	0.791108592328679
1875	cg14778560	-10.9834971798943	0.517255967844469
1876	cg15851414	1.47800468173742	0.922013601662983
1877	cg15824543	-7.06647260630426	0.57074978630628
1878	cg00992048	1.66209959615729	0.880931739984271
1879	cg00343906	11.5725314952069	0.0957878350801059
1880	cg27605903	-25.1590548223009	0.164478559592159
1881	cg13185289	-23.9200907847571	0.038809135699116
1882	cg09182189	-16.1141327262447	0.106262645682948
1883	cg17157064	19.844355268081	0.421002972815188
1884	cg04407228	33.0299074333173	0.0465788505561689
1885	cg10388316	96.5716047744941	0.0453704612448307
1886	cg00997530	14.4128201912343	0.746182610513545
1887	cg00328972	54.410468277739	0.133447427240968
1888	cg26421735	33.6969215585203	0.149176044423309
1889	cg12523155	-14.1971216151076	0.692827413464394
1890	cg18509696	-66.5911587818776	0.148912010809879
1891	cg25877525	3.24903397056536	0.924315548382347
1892	cg20045172	40.3565085230185	0.385865956261677
1893	cg25852883	41.0763850825934	0.358947858628729
1894	cg09932345	67.740893342762	0.040634480845146
1895	cg02297801	-26.3905013545867	0.0774591564249442
1896	cg02400530	-26.3009857062901	0.0321908903640162
1897	cg17266431	-22.4344425719869	0.0321374261108138
1898	cg19114248	-9.06204515364222	0.367503551570702
1899	cg05627004	-10.5865180855636	0.433555418398152
1900	cg11837076	-2.7004973650154	0.758537099975486
1901	cg18591364	5.69983185506788	0.609339616257938
1902	cg04157786	-6.57981725496845	0.267623429952313
1903	cg14958032	3.08160434668142	0.673461150847765
1904	cg00735586	8.65117328505007	0.440455517248359
1905	cg23678594	24.0233937268956	0.366725996004628
1906	cg22877644	-3.77527982096932	0.77795406568437
1907	cg23834034	-25.7776451712964	0.0508478797022616
1908	cg19083977	1.30679940587151	0.933444720105235
1909	cg02769781	-6.44866164319292	0.29564588850973
1910	cg24163210	-10.1384915532439	0.124804125492872
1911	cg00558749	-6.5929473101201	0.395056348943241
1912	cg13461447	-6.23853868002513	0.249946918340934
1913	cg10207218	0.727596417520001	0.922979303770403
1914	cg05262191	23.9880983946107	0.122565101998502
1915	cg22376730	9.16387990127464	0.463412225647386
1916	cg04902899	-43.4442870968222	0.124089789519505
1917	cg26568075	-16.9218473232933	0.280630510603983
1918	cg25314445	-10.5076814999209	0.618659248669325
1919	cg12076692	-30.2821634793178	0.136233765709696
1920	cg13336641	10.797548584175	0.554446601314408
1921	cg16418734	-11.4269485691784	0.476943153860597
1922	cg06843553	-22.2152862652757	0.237867490649566
1923	cg09292319	-2.44846832321361	0.899804188992731
1924	cg25666010	-43.6571336402055	0.00111839127978
1925	cg25075731	-24.7853444318086	0.0602988438346722
1926	cg25069266	-8.81011656071708	0.653429752726274
1927	cg05722993	-24.1859889090799	0.286537121344518
1928	cg08820807	1.18029935046153	0.855242397613151
1929	cg15523212	-14.1398610600985	0.283821057739595
1930	cg03335128	0.00949207195792479	0.999494888903377
1931	cg26793463	12.9855135072198	0.478546577676127
1932	cg21422400	-8.32881507086066	0.463403958932063
1933	cg25480982	13.4268764580573	0.455149034275859
1934	cg20732440	-9.09082861050205	0.646170593972984
1935	cg04397839	-14.6678425390166	0.532342058011775
1936	cg01729401	16.3489184447127	0.392130887584353
1937	cg02948693	-19.4800424525311	0.127589824391092
1938	cg27021587	-2.12117920001315	0.86631358875983
1939	cg05368896	-7.13977267059499	0.308802035050033
1940	cg12134886	-12.5027653614807	0.367507694886168
1941	cg01205154	5.99160061991794	0.445795609209127
1942	cg09535746	-5.34505752337884	0.459985891212817
1943	cg07068709	-6.75899698653285	0.552203529946621
1944	cg04260676	-14.8601302808223	0.215602652254102
1945	cg05813612	-13.8282564592029	0.408604165342135
1946	cg18821813	-1.49829797580826	0.943089595392622
1947	cg14527423	-6.13565425211982	0.629794155981285
1948	cg16677144	-0.407110519024861	0.967493666556841
1949	cg14953148	-23.0481614843249	0.0570434394611961
1950	cg12072340	-26.221498378819	0.0291502361224864
1951	cg18162783	-4.87070035874237	0.578099818807261
1952	cg04994975	8.2970870553222	0.43463838893664
1953	cg26147268	17.7002591355234	0.167550764257841
1954	cg05925326	-4.787699564985	0.729600904533194
1955	cg25599619	7.45913765862889	0.197846937151909
1956	cg16645714	2.38501564718784	0.424635761197563
1957	cg09503310	6.38573811938493	0.629002195615457
1958	cg03445765	30.9370317939766	0.181601624741458
1959	cg11836949	10.2052794014629	0.0257160455488657
1960	cg07432009	-23.8012941339488	0.0623071098797195
1961	cg03043696	-1.97512314399828	0.866355029469232
1962	cg19340909	4.69281228187611	0.773901857466031
1963	cg03716942	9.97849756841646	0.706298151688434
1964	cg06196161	-2.27115959086075	0.898198682265306
1965	cg23891190	-5.97197898286816	0.714946174376117
1966	cg01821754	3.48507692052877	0.798802379421564
1967	cg17483139	37.8695077862812	0.227192692036463
1968	cg04266169	-11.6908454707813	0.179466507876795
1969	cg15827003	-14.7239705417798	0.158317703178264
1970	cg18854735	7.77335065279284	0.617462862356241
1971	cg12150066	50.2088699990372	0.152172912906763
1972	cg23982607	7.46211304705953	0.111135316625702
1973	cg07380540	15.4906979131467	0.115895636088604
1974	cg16652392	-10.2691210683616	0.318570080199766
1975	cg26492771	-5.69469767348475	0.556804336125851
1976	cg21776599	6.57160804150757	0.419095857649349
1977	cg24706992	-9.11385760169847	0.49671474544538
1978	cg23936745	23.8951221951039	0.168877452655809
1979	cg00007800	-5.11584527303023	0.681493627219514
1980	cg09809474	2.27150354412002	0.912825282666898
1981	cg13918235	15.3396525198996	0.605862673041014
1982	cg16384593	-0.162527452725007	0.990575142055937
1983	cg00309462	-8.88481673275312	0.750391983945828
1984	cg23688809	57.7514919172914	0.0197903325107494
1985	cg16926213	-7.35023905372104	0.263750618439362
1986	cg09628503	-14.3650642624251	0.311585057436328
1987	cg22850508	6.43529639685069	0.737879985404499
1988	cg15102821	-9.68226438097476	0.401134545007201
1989	cg01755342	-4.22215090271919	0.709446565740627
1990	cg15819352	-1.44180313090966	0.888313767286152
1991	cg06443644	-5.5363461574764	0.543637637099352
1992	cg11549166	5.64034128574806	0.662466714278003
1993	cg22364929	-8.82434063927916	0.470853201701465
1994	cg05132306	1.91460760879778	0.826769189478138
1995	cg15715333	-7.1600697824399	0.506607381232699
1996	cg17434257	27.325243205572	0.226635154730124
1997	cg24188976	-4.90333200722002	0.695456747844359
1998	cg12642568	-1.52127687438207	0.884577431189894
1999	cg05995891	4.45359223909704	0.818085289082238
[truncated: 839,368 more rows]
