# Supplementary material for: Environment- and epigenome-wide association study of obesity in ‘Children of 1997’ birth cohort
Source: eLife. 2023 May 19;12:e82377. doi: 10.7554/eLife.82377 (PMC10198722; doi:10.7554/eLife.82377)
Supplement: Figure 4—source data 1. [file elife-82377-fig4-data1.csv]

	CpG	beta	pvalue
1	cg14817997	-0.0579010356344388	0.342950247687585
2	cg26928153	0.0281174473379669	0.896298104131452
3	cg16269199	-0.0709572009837679	0.45814984806658
4	cg13869341	-0.0236797104477753	0.866858391291086
5	cg14008030	-0.173981481663298	0.479600599551779
6	cg12045430	-0.187776366429879	0.386971308959838
7	cg20826792	-0.095115558666476	0.62246936222843
8	cg20253340	-0.0328244721478717	0.66140562570442
9	cg02404219	0.176835606386733	0.509274937143144
10	cg21870274	0.00549985274166672	0.96796012524045
11	cg03130891	-0.256199044151208	0.178198156672836
12	cg04098293	-0.158456438831967	0.397033041294222
13	cg16382250	0.194354669665361	0.529757001915891
14	cg24335620	0.345678006335232	0.013732860777296
15	cg22463138	-0.018791918778633	0.955529134893222
16	cg16162899	0.0813385724940821	0.571755723915053
17	cg01803908	-0.148766066350035	0.656762656429584
18	cg17149495	-0.290884371885029	0.0162341801893503
19	cg22802167	-0.312752750774832	0.104058654071594
20	cg24669183	-0.205373770479084	0.288132078330924
21	cg17308840	-0.0782832836956128	0.508426607625277
22	cg17866181	0.0369760668883048	0.905037033476625
23	cg25018832	-0.340783558488558	0.0331661943706014
24	cg26679879	-0.106143279564717	0.121379641781045
25	cg22519184	-0.15738984969136	0.131822669640915
26	cg11894324	-0.396126300735941	0.156009548777699
27	cg24159721	-0.223594256739277	0.453629175932727
28	cg02288058	-0.16759597700101	0.132731929024488
29	cg15174812	-0.319285085321901	0.256995495796396
30	cg12376350	-0.26831177750167	0.108311763093757
31	cg08477687	-0.109094227817466	0.044994406385995
32	cg00034556	-0.10115394828583	0.192474229076131
33	cg00645010	-0.300623652822579	0.00248286431651457
34	cg15394630	-0.235837333149178	0.115706007615096
35	cg05001044	-0.681456666361463	0.0263476788310172
36	cg03344490	-0.27182898069129	0.13203000123973
37	cg17501828	-0.214127961771458	0.392560598844104
38	cg11330075	-0.129644257483979	0.571182040889772
39	cg23917638	-0.152375135725376	0.141238910605126
40	cg18024856	-0.0481153253899518	0.304387342714561
41	cg18761878	-0.161856617220211	0.295264079481283
42	cg27534567	0.101439015658951	0.322648113535087
43	cg08858441	-0.0615988278279947	0.369119100430358
44	cg03348902	-0.509561843172734	0.0527128709486797
45	cg01070250	-0.443510845836973	0.0641076537150105
46	cg21996134	-0.119216118501343	0.175679455739087
47	cg07264491	0.481931837634299	0.103762151170547
48	cg01577251	0.0822740142551375	0.832120124867513
49	cg13128577	0.0385792926933549	0.861999329442984
50	cg15560884	0.024057164759651	0.9331555005983
51	cg10037654	0.596353950488462	0.0143753165186974
52	cg14057946	0.0617285280065043	0.809015265879478
53	cg11422233	0.241062493409262	0.171906928104025
54	cg16047670	-0.257131584048708	0.179126884218322
55	cg18263059	-0.206454893244701	0.0651060911777867
56	cg01014490	0.335394927278761	0.0645423396837456
57	cg11731845	0.0930704040851274	0.344946564550494
58	cg04231937	0.224775679369627	0.297925545997463
59	cg04496485	0.363541547661874	0.115473197484501
60	cg24063007	0.0764277374288911	0.680194449913968
61	cg11380914	0.254262918170642	0.187906019412776
62	cg10692041	0.000340155179009028	0.997594114753429
63	cg23904010	-0.0869725477193933	0.666964513790543
64	cg09961319	0.180437714753498	0.103592024360068
65	cg02339369	-0.0873337067656813	0.44445077379762
66	cg17505339	0.202285415207013	0.552894140656455
67	cg20527398	-0.380615139025643	0.2184586844429
68	cg23790246	-0.0812762768170067	0.801758454466862
69	cg20283468	-0.117072920605411	0.49007897737301
70	cg09499020	-0.0472801051554157	0.71259311157994
71	cg16535257	0.0926145477052928	0.341948449689717
72	cg15979415	0.251126188145726	0.372207163255762
73	cg09989996	-0.0882444563479446	0.830660674998246
74	cg05887128	-0.299398681645403	0.293432597072008
75	cg11304639	-0.0367388567401707	0.835882067478004
76	cg11954957	-0.199900756320712	0.156718277983751
77	cg01068023	-0.015082353751673	0.96468075192775
78	cg08167039	-0.11754239096047	0.727897933118275
79	cg20677962	0.0914116369877992	0.591311461942856
80	cg24699430	-0.0417705341379627	0.869872434309021
81	cg11882405	-0.0148471149389005	0.981570504045422
82	cg22394869	-0.259080736390155	0.584295463586458
83	cg02550592	-0.0548981394901454	0.917890965617046
84	cg03213877	0.423294901845367	0.424869101052507
85	cg19411932	0.316744539064588	0.744767338179522
86	cg10677828	-0.0497174293562219	0.838129498206956
87	cg08939496	-0.147408789644584	0.589797759955582
88	cg21482377	-0.1153239122914	0.231942922493915
89	cg05440980	-0.172602903330048	0.386086614464653
90	cg22416599	-0.183566993073156	0.276382606217067
91	cg04747364	-0.433487025929128	0.218987400104349
92	cg26304905	0.0736522918957766	0.828237977252661
93	cg11255010	-0.00726617847371808	0.985490670124933
94	cg20434134	-0.0298210302244325	0.933057952197117
95	cg16736630	-0.0118774737417034	0.90923953390623
96	cg21301391	0.105996325287905	0.63330114901704
97	cg25838738	-0.114564723989224	0.67001004535291
98	cg20350716	-0.406009600720702	0.295910870308861
99	cg20836817	-0.294085312749263	0.243433431165113
100	cg03289899	-0.106418657997365	0.773352643503995
101	cg01793617	-0.267967031535498	0.262527895212759
102	cg19973220	0.271817156088678	0.360678817561186
103	cg09139287	0.109302933838545	0.124931080175851
104	cg05662829	0.0530949097196526	0.506593638081375
105	cg03440891	0.032881652741544	0.691718606818362
106	cg22714517	-0.708025107495893	0.0496700393843447
107	cg00168193	-0.488289340986595	0.121166490997899
108	cg14280098	0.0813828222664024	0.735465093693025
109	cg15903280	0.0942085590974995	0.439108012306393
110	cg06325811	-0.119213853192983	0.343494421917574
111	cg08258224	0.00743297697783538	0.970867905095742
112	cg20447754	0.108284532967815	0.480735664143015
113	cg12285627	0.162321471517776	0.50545391742477
114	cg05898754	0.109953313555598	0.463684903695989
115	cg03128332	-0.0384518673064999	0.792491094093735
116	cg15994267	-0.403156120964734	0.0815792215625197
117	cg16619049	0.0110243908766019	0.896978496672689
118	cg23100540	-0.0208840053762321	0.745211616002719
119	cg27346986	-0.156286947282271	0.32520933381482
120	cg17698174	0.235765900970656	0.121842779663051
121	cg13832055	-0.0944348470779019	0.691157383943873
122	cg02793517	-0.0665314382446596	0.808772634431082
123	cg01328860	0.0392710126085231	0.83735809106131
124	cg11938958	-0.324115431490461	0.293920622692557
125	cg16364132	-0.134161325487261	0.318686346235719
126	cg05475702	-0.331810677032067	0.0786330477108773
127	cg01089781	-0.192431289405338	0.518723885941659
128	cg18147296	0.245674287323054	0.311499543671765
129	cg05597748	-0.353172859217527	0.167479371909353
130	cg00111697	-0.282095363491636	0.18932679389193
131	cg10988531	-0.0224009238092263	0.871491041520193
132	cg06919059	-0.0616596997833733	0.593098873636305
133	cg05321646	0.177435920898471	0.534816483424409
134	cg24373735	0.0331796232605137	0.917268975435947
135	cg13938959	0.235087878557219	0.0801802018947739
136	cg12445832	0.167944091115288	0.169921246582094
137	cg23999112	0.298875235036387	0.0144348312774229
138	cg11527153	-0.226853380158735	0.282173002954082
139	cg27573606	0.627900341101654	0.248563065539695
140	cg04195702	0.421531376208009	0.113180964441567
141	cg01062849	0.714620952952587	0.0129637067067938
142	cg08128007	-0.088590119027206	0.622294515930397
143	cg23733394	0.010365487677821	0.765966603500365
144	cg13371836	-0.0162776899263839	0.975016013647777
145	cg04407431	-0.479192100026761	0.37179604737153
146	cg13924672	-0.121081894394389	0.634731496140906
147	cg10847807	-0.0715902365916868	0.86761767579013
148	cg20501011	-0.14216546004544	0.45402205938817
149	cg13565718	-0.295093558614717	0.216602439367458
150	cg01097950	0.300971917581715	0.167016272649804
151	cg08900511	0.26183910344274	0.206219631547258
152	cg04410003	0.329345167620248	0.354061584067704
153	cg12726839	0.1092418573218	0.0258555127559817
154	cg04364728	0.178825052511372	0.0303452841047905
155	cg05151709	0.203147178608545	0.0891929537194024
156	cg08546707	0.232766169724672	0.120064409979588
157	cg01782097	-0.0940513460642761	0.536544983620717
158	cg20825023	0.00800243208328087	0.960673996279925
159	cg12549180	0.17703256328059	0.450233969246383
160	cg11851804	0.0654942800182493	0.64344649071139
161	cg06623778	-0.0551354835354552	0.625525798488107
162	cg08186992	0.097282409614408	0.640982319545633
163	cg17436295	0.0960596441402597	0.532875167934781
164	cg00613965	-0.163401146058322	0.636342543042046
165	cg18865112	0.181352929279962	0.0992157497253476
166	cg21407818	0.197413476324619	0.532200235120665
167	cg22226438	-0.277451698645336	0.136540283251153
168	cg08029603	0.106067489287075	0.723318933848735
169	cg16347928	0.399766289772571	0.309795881341241
170	cg22699361	-0.023354624661425	0.862693324905113
171	cg03890988	-0.232032626292802	0.232719827402505
172	cg21786289	-0.0594423511184578	0.638512082557072
173	cg13897241	-0.024981504124182	0.922479634257455
174	cg12712429	-0.143382500182438	0.358352760067585
175	cg13176867	0.25023724897356	0.201727355254741
176	cg15105996	0.0494960108154643	0.652114138809812
177	cg02565062	-0.183676890944077	0.375256011221793
178	cg09856436	-0.0619483596419052	0.589392935748841
179	cg19159092	-0.0843840312331695	0.703791608772171
180	cg27050229	0.386932221080618	0.307890303363255
181	cg06931612	-0.00892082574175124	0.97326415670162
182	cg11407801	-0.160868506550934	0.416476323380576
183	cg01197763	0.350822330667617	0.21885049092881
184	cg01789792	0.0743472147356723	0.634102342900657
185	cg16352085	-0.455736983291089	0.205093898838932
186	cg04839849	0.389371766660952	0.360611808789213
187	cg03725447	-0.0631696021916082	0.73190329885596
188	cg25215298	-0.550114771362261	0.420593269644002
189	cg04672450	0.805199775840158	0.0759705324481809
190	cg20341253	0.206687199751409	0.765451420772113
191	cg27487046	0.519195970575209	0.335121806643059
192	cg06091566	-0.0996030043599352	0.740168786503022
193	cg03735847	-0.433194056302045	0.494982853279958
194	cg27009105	0.174514478349276	0.747161791227825
195	cg03180780	-0.99613014428115	0.0498366440733853
196	cg04531633	-0.129125679178375	0.633167589648172
197	cg09166659	-0.985457459569838	0.0249189798766942
198	cg05527507	-0.000235939434611653	0.998918597371219
199	cg14324200	0.236966445765684	0.323828735275302
200	cg13856810	-0.188671618842587	0.314837140116944
201	cg02896266	-0.0126330187262892	0.951979044535983
202	cg13806162	-0.216001550507369	0.497029470908024
203	cg23225454	0.0925877254421623	0.553683024035886
204	cg00976181	0.451147852128098	0.0959141048015545
205	cg10711230	0.0407068878217904	0.853414181911166
206	cg00145911	-0.276774960246725	0.467363453637275
207	cg13546858	0.0183167067200237	0.728059018277377
208	cg13692836	0.0138457267745263	0.800836407471625
209	cg06531475	-0.017451985506633	0.764126913544247
210	cg06624358	0.0232357259604716	0.707269337120814
211	cg14156792	-0.0456877583095207	0.470459847841291
212	cg24997886	0.0165435940816037	0.795675331922031
213	cg01727431	-0.0253953297387308	0.706803710476542
214	cg10146935	-0.00833328344195525	0.863365692857532
215	cg02439789	-0.0197339944810681	0.706867327001324
216	cg24362661	-0.0240941318897046	0.617611222468626
217	cg05819296	0.174335867192574	0.358160406276608
218	cg00582671	0.105053470136227	0.623612638441161
219	cg22485363	-0.0534992572908024	0.7926832460735
220	cg06036236	-0.0270230231048457	0.917584080774853
221	cg03521652	0.0188380995247982	0.914207898594054
222	cg13904806	-0.188011715394539	0.468956392925482
223	cg03269716	-0.124402059963275	0.343309879727849
224	cg04121631	-0.0984988358665083	0.450627310430684
225	cg14183444	0.051442018322688	0.90769183719208
226	cg23440882	-1.01043652691701	0.000518329007831907
227	cg23112672	0.70589318674047	0.0437330227644412
228	cg15896339	-0.37318787549305	0.474109765335326
229	cg21801539	-0.268452863329985	0.50816952270979
230	cg02676653	0.498574750070323	0.281463357914363
231	cg19669771	-0.0394223063862805	0.858615223425947
232	cg12454161	0.0401764681067237	0.887953632677031
233	cg26477748	0.452245097901568	0.286123547340013
234	cg09180262	0.408085393685209	0.376983952419109
235	cg24045482	0.265006995088144	0.4835148682519
236	cg09988062	0.480407513881453	0.308532280714542
237	cg19724344	0.0284933261207218	0.912935001891247
238	cg06838427	0.432832410792248	0.402287510598107
239	cg10827460	-0.287324142902159	0.587452647036798
240	cg15742605	-1.21803891768815	0.0188562056299624
241	cg09756115	-0.280448436893793	0.309108701925463
242	cg23731742	-0.229935594365583	0.35619378308066
243	cg24114126	0.229240340018531	0.554843688294263
244	cg16952407	-0.0921118205680822	0.595554836052333
245	cg06511482	-0.235588789665017	0.402729507566432
246	cg17153432	-0.173202469249189	0.554737854650721
247	cg00113194	-0.0533253307273562	0.857379746472193
248	cg02968844	-0.477758920736458	0.125842677974017
249	cg16248916	-0.415002343218073	0.239953347856789
250	cg20322444	-0.63953067351694	0.108410913380971
251	cg07983659	-0.461429560339619	0.177012558315038
252	cg11733071	0.262268149122524	0.543904511019745
253	cg01394461	0.113804314383736	0.490155486468953
254	cg09555360	-0.363255373358411	0.362636320232959
255	cg07701223	0.245358185594373	0.618249611125364
256	cg13060902	0.201738580895004	0.541071396562935
257	cg16608242	0.100404827345737	0.70516793680649
258	cg21830050	0.0147655656164699	0.892521634295433
259	cg15684274	-0.14788865779048	0.504579139258683
260	cg16005420	0.382860484774654	0.136864055078442
261	cg02452688	-0.138068465722079	0.368607542053884
262	cg21362926	0.250551638050114	0.490924493053445
263	cg23430421	-0.382643032498416	0.205045914180242
264	cg24664590	0.587362799367051	0.294074729077196
265	cg08472719	0.185739362325114	0.618178652792068
266	cg03161767	-0.804007538717964	0.0649831159809688
267	cg10207527	0.073786055812531	0.793996529008213
268	cg04485075	0.269736387723266	0.506303849825063
269	cg16389252	0.600695094399781	0.203219031468346
270	cg19923810	0.090289197423897	0.531843393438714
271	cg25096313	-0.353077154088592	0.0283166196991526
272	cg13713718	-0.259859157610983	0.306248534134858
273	cg22114309	-0.296326681231293	0.0737106833578891
274	cg17368944	0.0677931307519871	0.771317988147211
275	cg11132698	0.389141511071267	0.202250333953963
276	cg09789536	-0.140834396327617	0.355374858376061
277	cg26866020	-0.826905905908089	0.0845976080181175
278	cg17505193	0.0598802438602448	0.906269668828803
279	cg13802035	-0.484621213999641	0.452598785315525
280	cg07582955	-0.0291040477969382	0.905560986835683
281	cg16968662	0.0561021501185862	0.875751060894139
282	cg07696918	-0.554357694711648	0.033534360895528
283	cg04359978	0.178302442046781	0.515640255557206
284	cg07236207	0.341066546307366	0.170304714892872
285	cg08198173	0.0993192836800232	0.638020839396328
286	cg01108617	-0.122220655454487	0.548812999995237
287	cg03148373	0.0175916894249406	0.906493942024223
288	cg10644916	0.0385220759785361	0.156141290079925
289	cg01930745	-0.791674960455662	0.0318342337791442
290	cg14860707	-0.800451509016394	0.0199669187914473
291	cg14997037	0.0835193489229321	0.79763453027969
292	cg15648958	0.173361296236376	0.674725454257499
293	cg03041482	-1.07905658245804	0.0105653615351387
294	cg00328058	-0.440659831067693	0.0705870211911147
295	cg02835406	-0.101743406232728	0.414209359247687
296	cg25742326	-0.0624237561905583	0.247397954133047
297	cg12663811	-0.114980402320706	0.192988866145259
298	cg07390924	-0.306728677035225	0.111239965308519
299	cg10110857	-0.0753249297271195	0.795376892103168
300	cg10375192	-0.182356484167913	0.165361074092722
301	cg02056921	-0.276606204687032	0.483032556017459
302	cg21832150	-0.0998656967198788	0.752559213920813
303	cg24076968	-0.472216330179125	0.220146739376795
304	cg12536471	-0.507497085392781	0.0772874403612084
305	cg06324192	0.119262516587997	0.578282011548897
306	cg23493227	-0.319754543135401	0.252738004073453
307	cg23207077	0.00181054007997682	0.994434008057748
308	cg24396605	0.076331050251274	0.588666891559736
309	cg22381068	0.0587706037984678	0.570904684317838
310	cg04865998	0.0958042608873518	0.584301409370162
311	cg07195057	-0.0494645855470643	0.788424164664026
312	cg26679367	-0.287544028271878	0.207702064590087
313	cg06818851	-0.177199442897269	0.452154269479247
314	cg10175834	-0.116009933779177	0.595000478641366
315	cg20691282	-0.610467816580705	0.0306547139723427
316	cg23956473	-0.173095594689075	0.611666924993975
317	cg16352072	-0.122099427128521	0.453710531867752
318	cg25107893	-0.0563404620711259	0.525815066677927
319	cg05505459	-0.00413928857061383	0.915683663686941
320	cg23635910	-0.0129798118351821	0.700200803564714
321	cg08546158	-0.144879046303156	0.305387271699638
322	cg08843537	0.00885429132864895	0.965370926989343
323	cg22348654	-0.0591822346858791	0.814526659289197
324	cg18166741	0.0609649081802547	0.686632808145272
325	cg22699004	-0.0837809691029043	0.73016972124209
326	cg09582238	-0.0366902882505017	0.785166400353665
327	cg10824915	-0.0520246112821093	0.773487283817722
328	cg22599150	-0.138191555087156	0.543561073461078
329	cg20869814	0.0789982827899227	0.680438597615832
330	cg22579372	-0.0349905791379264	0.795405793180457
331	cg22583825	0.0944251879412075	0.502926172538367
332	cg15526941	0.147702950754394	0.227761414767056
333	cg10201533	0.136233354485732	0.248118772057903
334	cg11235921	0.1510546359936	0.39090443229623
335	cg11782208	-0.0239574471214457	0.897762364403575
336	cg11143486	-0.0621831502995236	0.671476711816167
337	cg12199972	0.00638196726728298	0.9661896525496
338	cg00380574	-0.0821332717171433	0.478918329614538
339	cg10381813	0.115445454015783	0.375318837445571
340	cg15628028	0.0526815655889729	0.77008911294631
341	cg14350158	0.215746013973829	0.627469390373813
342	cg03394722	0.0648100850524538	0.699936615972161
343	cg26114254	0.237904293795679	0.441200886179524
344	cg03801109	-0.19196190218231	0.18368650583638
345	cg10010734	0.247326903130511	0.173334882853036
346	cg04983030	0.159765266083248	0.562467013734165
347	cg03648020	0.0553585181012718	0.354577356736138
348	cg01729262	0.126356390844142	0.420450313736649
349	cg15882305	0.136000600503503	0.531635863796691
350	cg15713103	-0.0345893167338096	0.825571356245474
351	cg23552821	0.155071108874245	0.624112784368349
352	cg05095110	-0.220552072929703	0.649588208578959
353	cg15578015	-0.420738931794333	0.432755668116632
354	cg23205003	0.315081058162093	0.550847708115909
355	cg17907238	0.0325601335742923	0.960096556810743
356	cg02397514	0.190110051138987	0.747588431646443
357	cg00447632	-0.241012447251934	0.494491325133254
358	cg26339484	0.269324748450541	0.536459901628056
359	cg27430493	-1.07182120506555	0.00268393102225547
360	cg25066040	0.275910315523515	0.48697972373621
361	cg27060622	0.177593997015822	0.583582579003652
362	cg08122545	0.0507140695185766	0.922880431434952
363	cg15825501	-0.128254304001331	0.650282665293001
364	cg13468764	-0.245986082525755	0.503294563775314
365	cg26321643	0.0586846473310469	0.793819655206883
366	cg16578267	-0.13279799392687	0.63415419877336
367	cg18977839	0.019376693019015	0.871195521623927
368	cg09332175	0.0431996362363868	0.876682623656273
369	cg16034521	-0.356548195935601	0.110634633881881
370	cg10176463	-0.254500097648004	0.532297684160002
371	cg25350899	-0.502190831197561	0.0935589428935664
372	cg06771789	0.105041527669006	0.647056236970233
373	cg13219080	-0.0344883299044226	0.887058828897313
374	cg09364122	0.28315267565906	0.140003209890554
375	cg17142931	0.211106940934112	0.234745570820426
376	cg17006413	0.306146749224367	0.0804216757276117
377	cg21472517	0.136976974207554	0.332597954083823
378	cg18019572	0.0379974379606614	0.825678464691621
379	cg22673826	-0.000135347738354111	0.999339496830865
380	cg10625579	0.013430843447303	0.544798238194564
381	cg01922485	0.102632644495312	0.291623156546824
382	cg12763038	0.104923728870982	0.606663651669617
383	cg26155170	0.164534751149996	0.421983815952993
384	cg03125763	0.0854941254607186	0.541294740553226
385	cg26155520	-0.00903728336215625	0.948531593775242
386	cg23691733	-0.321012587088153	0.163224961158637
387	cg04985032	-0.0313728883146711	0.877867086544893
388	cg24004483	0.0395057042805171	0.703657585274954
389	cg23281018	0.0591012434978138	0.795870929232151
390	cg24157008	0.0379270768032727	0.853401451190428
391	cg25552017	0.11729700430851	0.681759751000956
392	cg10984178	0.374282971971325	0.120506902536035
393	cg26420561	0.23086321686406	0.561673688214171
394	cg22020633	0.345037409826831	0.350114777873277
395	cg01768082	-0.0054085130614887	0.959054534071409
396	cg07589034	-0.00422501573920793	0.97611500909646
397	cg22367159	0.00628991815022471	0.959181973073215
398	cg26837773	-0.0306464732933743	0.812898235494496
399	cg15825373	-0.280449858390253	0.186352861778593
400	cg22618402	0.714388416787824	0.112321967616152
401	cg06538872	0.102639336495613	0.654685045716031
402	cg22182593	0.183214810757987	0.314871259056548
403	cg25610492	0.0435692282219282	0.812933359165775
404	cg08469540	0.227587610765659	0.306041079937468
405	cg20022511	0.471489524095161	0.35007490206478
406	cg21503301	0.206855516592096	0.605254719619103
407	cg22115423	0.204040058738209	0.643479730529068
408	cg23684711	0.479813030554444	0.308634163117649
409	cg08067365	0.689792488772176	0.192622656421103
410	cg20062691	0.0658170737275805	0.645384587532765
411	cg03811829	-0.04608179628904	0.774157883013243
412	cg11211792	-0.0122022322826997	0.938648053193787
413	cg04788999	-0.0210660919326938	0.861048393744485
414	cg16526047	-0.0524874371081097	0.684851225325061
415	cg07123796	0.0985802945867166	0.540608570506401
416	cg26560020	-0.0275390049519796	0.876176772824393
417	cg09363892	0.046003236907916	0.79507780649224
418	cg03185752	0.260616179314997	0.323797465744819
419	cg15153791	-0.282274562301304	0.418998053792566
420	cg04336684	0.774932086949663	0.0985101761412814
421	cg22482746	-0.73542194314578	0.283826467770357
422	cg25177113	0.0952534967724361	0.774554297600768
423	cg08223393	0.436483346628788	0.127341318143143
424	cg07008945	0.774764810078035	0.292790581341193
425	cg11726631	-0.862763172675927	0.100274657011378
426	cg19813362	-0.316077522238123	0.477134701629795
427	cg00299257	-0.104354632779422	0.795609267362832
428	cg10046671	-0.213315181602793	0.733944314993275
429	cg24704476	0.138081916641158	0.340413898720461
430	cg13917577	-0.0456200123651239	0.305127566139013
431	cg17801765	-0.0719263110333831	0.4841870176563
432	cg13100600	-0.0489751842427037	0.668786497736321
433	cg18272461	0.0786206973130839	0.551907322498158
434	cg07787977	-0.0326915484162017	0.863799850101663
435	cg02632261	-0.111153836657472	0.805226484759107
436	cg07396477	0.671944860448422	0.036454938553188
437	cg15574137	0.00632131095842031	0.982893802785637
438	cg25774148	0.449900164110505	0.153672795856767
439	cg17021880	-0.0924062315729408	0.801029631459828
440	cg02288964	0.0395102533269268	0.831990885202877
441	cg02341264	-0.0220324774921432	0.78893615399887
442	cg06712559	-0.491324948420115	0.189621418198359
443	cg17928920	-0.206088535682518	0.243392999519609
444	cg14663984	0.0310562620844926	0.918073767317853
445	cg16318112	-0.153154686201902	0.473455949413851
446	cg09248054	0.510047879448081	0.0791979916879567
447	cg15840462	-0.0830103662788256	0.737633519809233
448	cg24598973	0.010851793637197	0.940988491150991
449	cg16502826	0.19935006965543	0.279888617829062
450	cg18147233	0.0824585989087996	0.494912140302951
451	cg20741620	0.161919494067082	0.364632189619437
452	cg00525597	-0.564025035917501	0.0617951063941918
453	cg26007962	-0.620867111021035	0.0464310746426449
454	cg27541454	0.0605179286679072	0.719764123622373
455	cg25759916	-0.206177386032662	0.661806580341413
456	cg01150641	-0.0908552574325701	0.746003949468925
457	cg23625715	-0.972174719941615	0.0888768378490949
458	cg26222311	0.269165365498704	0.656877726145108
459	cg20594982	-0.107949763503994	0.19416842583839
460	cg06819605	0.09206336388188	0.862215874247661
461	cg14248627	-0.152991350376327	0.0890383828140899
462	cg03790440	0.154424743946739	0.701273664210851
463	cg15475967	0.236362530537048	0.12914891956014
464	cg02138082	0.010534552219625	0.916581368852831
465	cg10983617	1.01668892322036	0.0211271958159578
466	cg24934837	0.234257200119288	0.385082373560924
467	cg04029236	0.306558503552555	0.311920901009387
468	cg07407159	0.0236789287872355	0.793160075204889
469	cg16657578	0.184999991969626	0.654246348862547
470	cg09134969	-0.447892826836978	0.132478161464974
471	cg02635644	0.759648317276699	0.107258596482175
472	cg01711077	0.128188464599723	0.522001857849956
473	cg11471767	0.180882880069325	0.523396633828089
474	cg07501049	2.05396255337023	0.00926029543299954
475	cg14253035	-0.0081251019210838	0.982464968777848
476	cg12469361	-0.0368405028732693	0.916774755716954
477	cg24685837	-0.00429964553240021	0.973003723823887
478	cg20988802	0.0498833771289415	0.881166682931693
479	cg02245706	0.137687568624531	0.637162017610981
480	cg22379708	-0.225664237044671	0.252341337613734
481	cg16026189	-0.604671027123013	0.159086851906682
482	cg18380070	0.30353813285539	0.388185638679623
483	cg02494066	-0.52589758886034	0.00647909672049102
484	cg09792712	-0.155173566170678	0.594803237890677
485	cg15469001	-0.257572519586443	0.383442236411125
486	cg02742603	-0.178076893345266	0.545274309854749
487	cg08387293	-0.32926341115038	0.131020019643263
488	cg24730157	0.303835660005443	0.124097164242556
489	cg10309261	0.53184288035515	0.122672840852334
490	cg23801338	0.450560008547097	0.403841362201746
491	cg13244315	0.595034429930798	0.0673810172720416
492	cg11708842	0.692015998589214	0.0396692443973607
493	cg11853970	0.183960922235948	0.595219698866596
494	cg08480609	0.324301446522915	0.182054540707913
495	cg03120284	-0.290766895834241	0.357032317627316
496	cg27561293	1.43918632383189	0.121346184544989
497	cg04391811	-0.894408091944215	0.285649379680246
498	cg12147785	-0.157614398656557	0.69486199841803
499	cg10490668	-0.614307770022101	0.0590932066174855
500	cg22627753	0.218190705800829	0.160994433768852
501	cg04559824	-0.342520271751436	0.335683379389941
502	cg07912402	-0.357327844935404	0.599355300260102
503	cg04274259	-0.569082888890887	0.0416544491955543
504	cg16903000	-0.178212790765244	0.607599584731138
505	cg01757980	-0.210348630690811	0.517149361203876
506	cg12483930	-0.661587697398932	0.0310231487498552
507	cg02415349	0.0846413431173417	0.769473981083356
508	cg14252395	0.114590021211676	0.151375802130707
509	cg02096324	-0.0911940493175641	0.797671685382527
510	cg08262378	0.211009919094659	0.58020573411641
511	cg13439946	0.0110648701887797	0.943769339883499
512	cg08250879	-0.134606902976657	0.269208521458853
513	cg12184864	-0.12446195164641	0.636805103133631
514	cg21607076	0.146673849086235	0.447250046641948
515	cg12647165	0.382676622186738	0.338231765928373
516	cg02482614	-0.550843799849807	0.202772314514266
517	cg17098415	-0.175475444828909	0.611958250538466
518	cg11308274	0.0462224183645104	0.934560043451654
519	cg08459564	0.0998050948476273	0.786540304905662
520	cg04919596	0.0858280268162147	0.477877183348289
521	cg24678117	0.0918049624251588	0.492374868640955
522	cg22169680	-0.189221866805468	0.358069092109347
523	cg10720997	-0.458045411223478	0.041812611361766
524	cg09908510	-0.0808901231822257	0.760454787030404
525	cg09123721	0.0570182066320244	0.653368941134031
526	cg11405655	-0.0825637200398702	0.59985362204987
527	cg25523405	0.910907223141255	0.074987023047282
528	cg02105666	-0.354276397448631	0.492870829961235
529	cg21139076	-0.54871227527756	0.0228417922528241
530	cg07549208	-0.0116744987780556	0.935387199813953
531	cg21779088	-0.0217019600494569	0.920866273192656
532	cg26614117	-0.0647165109084009	0.780613193328806
533	cg06095202	0.0720127409620454	0.736731460065356
534	cg04891761	0.0527693868054639	0.739168991425474
535	cg15500259	0.15901629785155	0.455153815716834
536	cg10955566	0.0969191606675126	0.131234662899372
537	cg08709360	0.0822538481372973	0.141622788430304
538	cg01244934	0.139387298032529	0.0774750633046881
539	cg15899727	0.096071758317545	0.183279447748288
540	cg18432292	0.219598803626228	0.0691626428251873
541	cg24475622	0.124692147931273	0.510317414528987
542	cg07147720	-0.644537102364196	0.145718173398808
543	cg24047311	-0.441222985665569	0.440502878579907
544	cg16095440	-0.277682655738726	0.707871540675728
545	cg08750554	0.118441505546535	0.544581105507549
546	cg26702212	0.249221182564035	0.327220214385958
547	cg24517686	0.250963962664365	0.36365606718111
548	cg27222785	-0.1010272184565	0.745237699298339
549	cg09864227	-0.0550219313696715	0.797162971331995
550	cg26111997	-0.152902939485459	0.510650801403119
551	cg07181843	0.0392908809003977	0.866936888855459
552	cg25646531	-0.0976196170167358	0.646135296692176
553	cg00478379	-0.096288244370733	0.645328740489898
554	cg10782557	-0.116832298983306	0.515267849771615
555	cg13754917	0.133020738653535	0.432556711417777
556	cg10168544	0.143234454911146	0.294400519897161
557	cg01912388	-0.0702681490900206	0.48038294055008
558	cg14854474	-0.158486663873089	0.118573391891264
559	cg01518906	-0.21313422235324	0.0738130501092967
560	cg14964771	-0.156266257432874	0.537022788233192
561	cg22044028	0.0224177835788244	0.77473636506773
562	cg15576492	0.00669293251813776	0.893265018618234
563	cg11200797	0.023378740710126	0.83045057192968
564	cg16383573	0.0767307149536745	0.853066574413299
565	cg00305285	0.27743379636086	0.0567728741412985
566	cg24378253	-0.256292290553254	0.677704579363223
567	cg04794393	-0.301468888016573	0.379283828755354
568	cg17840536	0.00681253954093387	0.987130723146087
569	cg19758750	0.150679845793563	0.665605531287153
570	cg16632098	0.187384173872837	0.526155293176043
571	cg18024260	1.6197134114231	0.0296819864800426
572	cg12924059	-0.093252632886562	0.824466800507714
573	cg15099245	0.105460353847886	0.756550632934941
574	cg08039585	0.179388204520371	0.509705528451232
575	cg19734301	-0.0427441046392405	0.871721469680403
576	cg08470135	0.19445314514514	0.595080699480984
577	cg05035248	0.671433149022953	0.395940885801529
578	cg05041517	0.100238920081435	0.716045205865016
579	cg15207999	0.328991036834261	0.38541512007567
580	cg26338735	-0.098317523076875	0.773775631686149
581	cg24437834	-0.730846550087534	0.035015478052031
582	cg15565004	0.42465325345268	0.138336523629474
583	cg19999567	0.0320434420345345	0.811583400563797
584	cg19856606	-0.0736611789518602	0.783847691404386
585	cg12743165	0.0886816887407742	0.787620117538248
586	cg04065236	0.112426532411192	0.772509837197153
587	cg04315086	-0.036427338456414	0.915455579735777
588	cg09358422	0.145095918921327	0.722920021145413
589	cg24523322	-0.785060586119579	0.226162887049735
590	cg12612065	0.517440329839775	0.119121130268302
591	cg16060740	0.106328526658942	0.731989393216867
592	cg13870982	0.244028650853078	0.448714394710388
593	cg14010231	0.0499471048064496	0.89595019254018
594	cg22343299	-0.0176786010929899	0.976545041424984
595	cg17596279	0.550316541730166	0.0930397322357834
596	cg15322667	-0.182186991883561	0.577713947191245
597	cg00648573	-0.102654039760287	0.709447987118426
598	cg11144217	-0.179760473884134	0.792653013550735
599	cg10782633	-0.59742694837857	0.512710426626005
600	cg27169685	0.0109387469501484	0.975175033289228
601	cg06727198	-0.781595758042916	0.0307511735570455
602	cg06375409	0.601679554527954	0.0416895069359104
603	cg19307389	0.271444391395554	0.291595110268765
604	cg06444226	0.0234242033723712	0.897046173957035
605	cg06181703	0.178870964364576	0.702843621495356
606	cg23812948	0.247539530122078	0.310068167453635
607	cg17539962	-0.227538655023208	0.146467978576349
608	cg26040075	0.171193274456626	0.493261350282421
609	cg24165743	0.0843485574592055	0.692476754866562
610	cg05007472	0.0819744149819388	0.841455640440617
611	cg01881456	0.14407948685446	0.541187236154612
612	cg00546078	-0.0094531172090836	0.936921097145771
613	cg16685990	-0.370461118782906	0.275953075991301
614	cg19860160	0.059346114955967	0.785318127410114
615	cg26405545	-0.0656831778439134	0.873315543036175
616	cg20961824	-0.190958133820378	0.358447946515177
617	cg09762182	-0.0113091361548892	0.557085482174982
618	cg11754357	-0.0446626020532151	0.903266441214573
619	cg05527091	-0.553057164542951	0.489665583437816
620	cg12137247	-0.417266242017981	0.303201527224991
621	cg24709745	-0.316870372533175	0.473387517128941
622	cg08927102	0.592823215413649	0.248884058040907
623	cg27302190	0.305060231531375	0.231476322704654
624	cg18025136	0.100374831281275	0.452200232861077
625	cg24638131	0.123169310158367	0.62149273726001
626	cg14981312	0.527526320747963	0.101278727166983
627	cg09383789	-0.572196877531258	0.201778584297554
628	cg27053169	-0.0153147350416176	0.9527799547722
629	cg26541516	-0.0186163558279757	0.960816580996593
630	cg03956833	-0.00288120120617685	0.995552325734316
631	cg08881995	-0.55838918535054	0.490504611738375
632	cg03705284	0.211717067707625	0.784956859280779
633	cg15030799	0.545675454616883	0.36991166889736
634	cg20156053	-0.0144717616049236	0.97709000954256
635	cg10126324	0.2348116722834	0.0778772906302734
636	cg06036677	0.134595592864916	0.305581287398015
637	cg10579718	0.320990147072839	0.117026533595513
638	cg16679343	0.369215063085796	0.130218103011172
639	cg19626656	0.104258318967028	0.461654924036232
640	cg18943819	0.0520825052653624	0.83171613365183
641	cg10026356	0.630428681972851	0.0457612570528489
642	cg19248961	-0.0421744449421875	0.767436279152934
643	cg10177439	-0.493222211538714	0.0912560102563252
644	cg26346563	-0.401538712213711	0.0470101722582887
645	cg00918900	0.071382105444192	0.511070842483404
646	cg27582017	-0.527494450953417	0.121773061859314
647	cg10113217	0.0259684424841146	0.874458939305278
648	cg08899471	-0.460623668309102	0.246276528087595
649	cg11920144	-0.0752564980787613	0.804735266601078
650	cg20619296	-0.525620147914897	0.115231896697174
651	cg18329352	-0.200155953899985	0.273468972645555
652	cg25973293	0.266924608109176	0.448382857789382
653	cg27582546	0.0673856131753823	0.630935906052863
654	cg03520879	0.328331794731341	0.345808376593538
655	cg06798288	0.495054490427913	0.0586211352943201
656	cg23035597	0.0183506481730655	0.926030967668213
657	cg02838683	-0.544132515156734	0.0278213570647374
658	cg08131937	-0.109542178447357	0.73857955305922
659	cg22512779	-0.317854286804354	0.125301981696831
660	cg23622235	0.00610683973066438	0.983038574894081
661	cg17094363	0.568836904167691	0.0526107140299252
662	cg09146328	0.038811470075546	0.811237958618225
663	cg21775619	0.0690658908799656	0.715471483695642
664	cg07179016	-0.0689165974191099	0.662036480731367
665	cg07203151	0.139809461409769	0.577936230013411
666	cg11750929	-0.140606036912221	0.5142964688665
667	cg01776299	0.0207528150786614	0.910388401758304
668	cg00300303	-0.0537128262891192	0.699405525339187
669	cg09032281	-0.0389661618997793	0.828035574453006
670	cg02852398	0.0178978040109174	0.919539981973282
671	cg18272703	-0.763490921871628	0.024080781792952
672	cg05528516	0.201691208527886	0.0690385838198776
673	cg13361271	0.245160829043665	0.50522216647266
674	cg25237545	-0.0548937511606455	0.805717908052436
675	cg09914843	-0.725948670400937	0.0763740709385661
676	cg15822328	-0.1333480152359	0.563840963495461
677	cg07304255	-0.102741645028613	0.778125108277375
678	cg19925558	0.469381369626862	0.189823050568107
679	cg22433276	-0.290360908919854	0.549393728791062
680	cg06615380	-0.203303733796914	0.532845733381693
681	cg11071912	0.246860708449086	0.0243441508610123
682	cg00812770	-0.0542201498392283	0.77028554428093
683	cg16254267	0.169022747760053	0.418174830378967
684	cg12274407	-0.00639450945537972	0.963204563461084
685	cg16639967	0.0566236916352814	0.856782861186194
686	cg14824543	0.16856482027596	0.389927507247559
687	cg21862126	0.0973219978816152	0.358215004177988
688	cg12097325	0.162558189682567	0.0954754099135933
689	cg15207968	0.277828004499566	0.325461651314198
690	cg12755103	-0.299287553580425	0.456885416896978
691	cg19708306	0.18958567705259	0.403328297295466
692	cg03760138	-0.245321164696596	0.107783120798003
693	cg24158844	0.30119184460478	0.232829812662087
694	cg25772221	-0.0263344083736655	0.929218416745724
695	cg16140890	0.553801592097877	0.0630454308355295
696	cg13395069	0.126972520418703	0.562067721568665
697	cg03228985	-0.307478896483175	0.318933023916004
698	cg16989340	0.0250852208330194	0.932236218289009
699	cg20254790	0.0706306283874593	0.696745410068351
700	cg11811960	-0.362010271924384	0.197100004907569
701	cg04311266	-0.130055396130148	0.683203158251018
702	cg05929553	0.423990116423196	0.399746936839415
703	cg10399850	0.122555600909157	0.474453748648871
704	cg08803531	0.792939981299917	0.0285752944982288
705	cg12806826	-0.12839885656295	0.6860609905275
706	cg15988843	0.0407575081016991	0.919703334333059
707	cg23891858	-0.108554051817332	0.522189152837897
708	cg14288281	0.120797964283577	0.409340232435046
709	cg07213830	-0.0141661925711146	0.87402677238064
710	cg09661118	0.043448141037747	0.858169778643703
711	cg02971920	0.172540813926868	0.250466291176613
712	cg06767191	-0.754234726288308	0.0290265495159917
713	cg15688253	-0.393883184239985	0.290178312352396
714	cg22864340	-0.114405964849705	0.703962408137377
715	cg10335452	0.0158204191910823	0.950672658932404
716	cg06193359	-0.492656302311352	0.114077752680402
717	cg13560058	-0.187042691948326	0.386222594249491
718	cg00082285	-0.35541191308404	0.0697637623221217
719	cg21778193	-0.131338810900892	0.181628954280448
720	cg15489799	-0.0349045809913281	0.841249085676424
721	cg22521151	0.075562325801213	0.725089214277178
722	cg00207921	-0.0384100763731704	0.838318129514075
723	cg20544808	0.214450758523563	0.274435967230668
724	cg18792131	0.0520105940358431	0.692534133722387
725	cg08090385	0.0270060533578158	0.86134126195723
726	cg08474826	-0.150780819940331	0.502592895165757
727	cg20185617	-0.0145171970277762	0.943563842672918
728	cg04972348	-0.0661754953818088	0.549849074143441
729	cg06618740	0.000329402840886839	0.996809190211964
730	cg15414773	-0.112365166189656	0.479075360925056
731	cg21475076	-0.0636634729362771	0.59508326925
732	cg14476334	-0.131854738886745	0.414959197118434
733	cg22109930	-0.0892204869469597	0.621373723096629
734	cg13449535	0.0586538800949544	0.64618460618332
735	cg07123481	0.0327576482620914	0.877030816699547
736	cg01537494	-0.321423493843766	0.279932209140667
737	cg02825344	-0.243308180073027	0.351716352116758
738	cg02331673	0.161583149843541	0.587888707482855
739	cg11203990	0.0231795441664747	0.923732511939215
740	cg13362546	-0.0479713966174494	0.744917047904527
741	cg21810793	-0.00161029579107826	0.995613939400193
742	cg25101291	0.539156155794672	0.0992309247087794
743	cg16561256	-0.22311393725802	0.456379050912423
744	cg26330479	-0.372284271774405	0.103497939607726
745	cg06967105	-0.251088770407432	0.298688315667015
746	cg23651812	0.0566341345050534	0.49805616975091
747	cg03528302	0.0378108374303137	0.885952837918745
748	cg18348086	-0.252571038998856	0.0490901301477555
749	cg23731501	0.0810607472843744	0.555119595222878
750	cg14287724	0.200317481942024	0.15096008828874
751	cg25605174	-0.0768378130494329	0.726413799506641
752	cg26578072	0.285490340951565	0.237816518216597
753	cg23857983	-0.0736411363502929	0.478313026004254
754	cg27631599	-0.116017439859311	0.113341167013147
755	cg14709479	-0.0674189479533982	0.113407863336896
756	cg14786652	-0.092320872334559	0.0106150865069253
757	cg21288685	-0.175295299928929	0.0361494680827379
758	cg25544075	-0.139813842678195	0.0755437190479664
759	cg10143960	-0.0610404031573372	0.0506990533607709
760	cg01511231	-0.0783315904507596	0.0686298409481113
761	cg03278726	0.0495025912118959	0.62547291742228
762	cg15417666	0.0592866968583294	0.617684088525194
763	cg18770446	0.139946811678753	0.420420609588189
764	cg22047469	-0.379991440401768	0.131228417530768
765	cg08933284	-0.343524912776231	0.0189977240692499
766	cg04206665	0.161563653945248	0.368683812591188
767	cg18382926	-0.192344078594706	0.260453282929126
768	cg08844387	0.699693912253302	0.0340338815769095
769	cg16043700	-0.327314999193502	0.0716389141578425
770	cg19584957	0.0101939106757533	0.97378567351472
771	cg07173112	-0.133886970741407	0.57084907585826
772	cg07841371	-0.202701430901402	0.191040952201457
773	cg23275914	-0.242376813138755	0.243542118442028
774	cg14220262	-0.107434397007828	0.657035712012101
775	cg05555852	-0.687178100856452	0.00319391067943035
776	cg02848157	-0.103887935360253	0.762732641413846
777	cg24884961	-0.424181596711054	0.089407167512775
778	cg17168771	0.173363158353024	0.427183982729981
779	cg02014020	-0.0167341047525321	0.976912232312679
780	cg03340606	-0.112533181260645	0.854372083286339
781	cg17510786	-0.14473025999714	0.651691476368651
782	cg19724260	0.0369012270341499	0.897748050601276
783	cg05706898	0.0639557702007737	0.775638498525329
784	cg14008593	-0.0345797249138133	0.803877431520369
785	cg00699898	-0.0334950326577637	0.844558122457808
786	cg16366262	0.0310930319881207	0.708496681170613
787	cg08886036	-0.672734023223713	0.00606533054411379
788	cg06440474	-0.108934801700007	0.731697778117361
789	cg16053440	0.184315321315621	0.43661578071488
790	cg14278226	0.0843134589931271	0.78460980096696
791	cg23087108	0.400399485911268	0.40103688815346
792	cg06910084	-0.106949759630397	0.658822135675721
793	cg04808954	0.141598599774832	0.211867053954036
794	cg10333212	0.166967687710472	0.151342459496797
795	cg05652547	-0.66261058104935	0.070886003184276
796	cg02852923	-0.688751536238934	0.0594079505818285
797	cg00146669	-0.197461565749555	0.479714032780228
798	cg18411941	-0.0599351505993476	0.861657586166554
799	cg09021712	-0.301997416244782	0.242103321605375
800	cg04154653	0.0261995682226126	0.33453054104611
801	cg14000174	-0.616141146258684	0.014141868861079
802	cg13089299	-0.0287194800879848	0.914594983348934
803	cg22723960	-0.683175094486593	0.0943776242756066
804	cg13360866	-0.135791728998506	0.580845366003265
805	cg24807889	-0.378362351501847	0.11884347159757
806	cg05952202	0.449231674506332	0.357639472373338
807	cg04172501	-0.348593405183604	0.126880734239085
808	cg22696995	-0.176911864478756	0.622064341483462
809	cg23400617	-0.0513025517262841	0.896873013401159
810	cg06778273	0.0264930170045821	0.922910363207862
811	cg18319381	-0.280508611187587	0.250046679834994
812	cg19413397	-0.0579485625896701	0.869839463905838
813	cg12810734	-0.243654589629742	0.365549975728662
814	cg16046810	-0.333138155686914	0.357987824115861
815	cg22345205	0.321566552799361	0.244656442041857
816	cg21038584	-0.191655765347607	0.155498634549136
817	cg19237691	-0.158675388034387	0.445779924759057
818	cg08641866	-0.150640583473371	0.817917552461122
819	cg14886269	-0.357483120176851	0.15400840862797
820	cg15706223	-0.303379005974938	0.287369778289864
821	cg06097659	-0.0930059697896997	0.581346537473559
822	cg04343794	-0.206091271541583	0.140798162423989
823	cg07671976	-0.280617579890433	0.132738197910438
824	cg25725823	-0.178242024033083	0.112180571675526
825	cg00086243	-0.127145777655305	0.301673071642021
826	cg10583942	-0.127412063891841	0.262113501277965
827	cg07119157	-0.181994333711621	0.128300292224565
828	cg19092396	-0.131964174473531	0.399152299620029
829	cg12701018	-0.17387354578333	0.455197331998034
830	cg25144135	-0.0713627326380794	0.627052964626285
831	cg20996124	-0.109466985629956	0.609947093624619
832	cg16266669	-0.0585402852969603	0.491474205741844
833	cg02296931	-0.144296930989085	0.286254100974895
834	cg15924570	-0.0562402747888227	0.559300225268867
835	cg15993652	-0.0145663293098159	0.887696959977021
836	cg25625296	0.120372217610619	0.69472783325993
837	cg09503311	-0.170624164712932	0.669714835078801
838	cg20544186	-0.308633640882806	0.271227560890766
839	cg01437515	-0.00644409824290998	0.908352872156428
840	cg12759096	-0.0782681008496389	0.296674557080483
841	cg22335801	-0.0285272223907851	0.853756941684004
842	cg14661234	-0.0787816155145738	0.433406934657079
843	cg23166857	-0.0755395491117682	0.50793936293615
844	cg09586191	-0.277092641533148	0.146515130413096
845	cg01341040	-0.206730864966867	0.349793980711145
846	cg21616720	-0.189560915417703	0.299310626619032
847	cg21815220	0.00403817722088755	0.987299746604104
848	cg17084044	-0.0760272916126188	0.741555684976201
849	cg16252905	-0.151344377142336	0.58277629497633
850	cg26312965	-0.329197373273622	0.136861086272909
851	cg09315878	-0.0744656689666948	0.588204507662106
852	cg01075305	0.509102687508633	0.395254158714489
853	cg03058163	0.106665628161503	0.470458422178965
854	cg03580801	-0.39477687119754	0.333726356660085
855	cg19862782	-0.247427708561243	0.497917037804747
856	cg12219387	-0.387756111497202	0.611105510404637
857	cg11727921	-0.257159153233761	0.357429189396056
858	cg01783406	-0.0250287149547131	0.934679149433565
859	cg14531564	-0.0502259057612592	0.614614185558773
860	cg09276842	0.0906418343536574	0.714402310149145
861	cg07548512	0.536004581666309	0.555636362381011
862	cg22798412	-0.360514820816277	0.453211077221471
863	cg27477059	-0.35349529704749	0.252405432041274
864	cg25578497	0.17160929316511	0.563827159244616
865	cg00656410	0.131504252070495	0.543124348106043
866	cg10206039	0.0077078316877745	0.965795453329051
867	cg00062072	0.0500677895020022	0.410838214906064
868	cg05818515	-0.0436614724508741	0.839685170033692
869	cg25282454	-0.0438249954390298	0.208902711322742
870	cg03467014	-0.263202596486737	0.447983518265427
871	cg09819798	0.017776531922693	0.782614070301466
872	cg23082845	0.381221991926963	0.291176545979639
873	cg04559485	0.103200003669055	0.816590716428344
874	cg21837391	-0.243702717391773	0.369598606627509
875	cg05329510	-0.192527234900135	0.433613574690287
876	cg17414873	0.0709971410997026	0.755961458603778
877	cg03935783	1.1946143697288	0.0345617303775787
878	cg05638471	0.053932835962219	0.848929415208311
879	cg18367529	-0.00750977531183006	0.890707199227722
880	cg20300707	0.00312453317510494	0.990606078321189
881	cg23963070	-0.12773370384464	0.773584490276653
882	cg02974491	0.0192797987895513	0.792955543989416
883	cg09812885	-0.495333341665929	0.110438417138015
884	cg13470499	-0.501157469622358	0.190724217703644
885	cg27310827	0.818901497003481	0.248288105277673
886	cg11257497	0.138675975418491	0.763158043959307
887	cg14965611	-1.22181425469445	0.00666067679191909
888	cg25619287	-0.0437232812222089	0.606308532542862
889	cg20014591	-0.170109787759741	0.642446209322977
890	cg02224920	0.720558775927638	0.278362982928532
891	cg20871445	-0.39429712904162	0.415290371267191
892	cg14394203	-0.84821185703867	0.0895275802159516
893	cg13924635	0.0512904482071762	0.844929691069943
894	cg08701814	0.112176402939316	0.640836557794749
895	cg22220310	0.741454747047342	0.336185055792703
896	cg14477263	0.121183615790667	0.816178337737668
897	cg08706355	0.333161523785301	0.397440468704177
898	cg07963816	0.173091010930367	0.588767103434536
899	cg07146103	0.354983786957183	0.245529617986994
900	cg25731959	0.200255300081184	0.399432199107179
901	cg14830045	-0.0612903117510905	0.589615493965947
902	cg10784110	-0.220057819393118	0.329921552692244
903	cg06964912	-0.171689128904713	0.179358779390274
904	cg12108798	-0.286667646054826	0.0911652608681939
905	cg00657094	-0.222403378785375	0.216216879867699
906	cg20411340	-0.255266898659562	0.0699232980590116
907	cg24034746	-0.289772945314454	0.147575226122378
908	cg09331144	-0.121912616620087	0.15904265097824
909	cg10483828	0.13464463355284	0.634969135712574
910	cg07719599	-0.121055555725436	0.66497091153969
911	cg00211609	-0.118932711224304	0.541962844201192
912	cg10378904	-0.134656397422082	0.506970465207282
913	cg22512888	-0.293441051877089	0.343512050031294
914	cg24345856	-0.0468673296274295	0.0647440152775466
915	cg21664227	0.0384120353008991	0.872890073764084
916	cg26362806	-0.166881166093253	0.62468567421113
917	cg19666520	0.632877704978501	0.236054894030886
918	cg14329010	0.321376888471255	0.531746176828009
919	cg12345380	0.00841314211283018	0.96241093855806
920	cg02279987	-0.0198386927787456	0.852156640046272
921	cg19236794	-0.0359058911419659	0.648185409585704
922	cg04719903	0.00862325115417541	0.960923037855461
923	cg25594899	-0.515050347533713	0.35978630237641
924	cg06136878	-0.168638990988481	0.739661328744895
925	cg14089984	-0.292456530202672	0.268709839683652
926	cg06443533	-0.107648712562556	0.598617534578241
927	cg26314055	-0.207985439133868	0.408622462578679
928	cg02751993	0.272877900106011	0.390793955410222
929	cg20747739	-0.204530657266845	0.23884375352105
930	cg15582176	0.152637231625369	0.0968457778728703
931	cg13440692	0.0892390379426923	0.23400463741524
932	cg10664344	0.0909751686701183	0.11576849528045
933	cg17267508	0.0451563556613805	0.89179899901879
934	cg19869091	0.617446782154029	0.131193640525098
935	cg08643618	0.691689759509074	0.253078487795608
936	cg24701867	-1.13314682629287	0.240558328904593
937	cg06361835	-0.033996997072686	0.915191724815545
938	cg16176300	0.0257979487719445	0.856414701763258
939	cg17469240	0.171493151651519	0.708645659529287
940	cg19081571	-0.0419576166408568	0.927622138677253
941	cg13689260	-0.197598847755088	0.608927953613729
942	cg06754550	0.392668917469353	0.284628492951089
943	cg10518155	-0.457572225181904	0.370676973352926
944	cg17784606	0.0325246400683772	0.917108224351096
945	cg18153662	0.220107957234787	0.521381763853432
946	cg08733913	0.520180833403106	0.205310127600218
947	cg02334770	-0.414864055135888	0.170469320072652
948	cg03583709	-0.305348441569457	0.420710432757562
949	cg13152599	-0.620311707809666	0.0422184256982299
950	cg23880637	-0.146973688393265	0.697746657732516
951	cg22699977	0.265922856499095	0.270020009192604
952	cg10245314	-0.205708798823174	0.272939618753171
953	cg21583518	-0.151162610742651	0.311387840808516
954	cg14661139	0.0539658266984096	0.653836830438667
955	cg17177602	-0.094347036086241	0.393729370018835
956	cg08884932	-0.0162678690648846	0.922991988071017
957	cg11225330	-0.0157494860592444	0.908437282707638
958	cg17869799	-0.247234969194315	0.00502244288819906
959	cg03525583	-0.0557834071775826	0.84547698332203
960	cg04026747	0.581400297149211	0.0987469698085099
961	cg19709095	-0.302548055162286	0.480286088466126
962	cg17848797	-0.0112684794686621	0.952316278087162
963	cg12631550	0.129441516729585	0.572041267051568
964	cg21680388	-0.0807100311867571	0.777910882917896
965	cg22725197	0.178396178865583	0.530115108450146
966	cg02823370	0.239300145548483	0.336822116367803
967	cg08486042	-0.0255026950226419	0.947447354522332
968	cg07269843	0.296431529387634	0.440843994489462
969	cg01341249	-0.298484073585467	0.0364629891790882
970	cg15578176	0.0307105629986077	0.894055413305933
971	cg09906735	0.08527074065835	0.80235834436589
972	cg25674129	0.293938691672819	0.483644706979195
973	cg13375638	-0.189166669113052	0.641426701951268
974	cg04296903	2.00049793265414	0.0288265663355579
975	cg26527092	0.138608929791242	0.674993585557217
976	cg19816994	-0.384619469345963	0.554007852047862
977	cg24658349	-0.0981026592342111	0.807494828460663
978	cg02859098	0.161445586635706	0.568523148672554
979	cg22009470	0.0985367829389955	0.3546244613297
980	cg17599045	-0.375297362002099	0.10477055622701
981	cg16045223	0.187552580779099	0.427447764465033
982	cg23891364	0.193086383736961	0.0397414515078608
983	cg21864845	0.0388731010745131	0.919213028743642
984	cg02913364	-0.407143413483049	0.399250000652603
985	cg16717690	-0.0785401919921029	0.897766824111625
986	cg09094385	-0.118437865934194	0.753889942503829
987	cg02581421	-0.496812214804436	0.380778863608039
988	cg03322129	0.553712145756481	0.350196375209639
989	cg01794932	-0.0170749204095547	0.981585120271541
990	cg26163375	-1.30472154698987	0.0304984416487099
991	cg22670128	0.206852778502419	0.468533478659838
992	cg10410269	0.133267301740598	0.539423668003093
993	cg19933051	0.172943703606855	0.548936013926577
994	cg16626107	0.332356187272323	0.327266539125622
995	cg06294324	0.791865510117089	0.0141019682328043
996	cg27530087	-0.264629245102041	0.335584287190127
997	cg14436909	-0.286787137005063	0.456528715924725
998	cg06198843	-0.032772931991292	0.953593222153617
999	cg16343995	0.373273981874357	0.288245570766163
1000	cg00942814	0.165075869916749	0.552309509045586
1001	cg07812848	0.0939718404321046	0.785954339794136
1002	cg24457425	0.363544649694591	0.140540733950838
1003	cg10784146	-0.0588040048957041	0.847142949384002
1004	cg06002705	0.183310564147397	0.552813600710586
1005	cg12120973	0.00391533515979031	0.981295015402648
1006	cg19861048	-0.876339248888496	0.00518278784432058
1007	cg13587552	-0.105006788507983	0.61378486831268
1008	cg11229611	0.299850292506599	0.133165055620028
1009	cg06909630	-0.263721268080516	0.236000420296489
1010	cg17645946	0.0693386674566919	0.759110006319112
1011	cg27651942	-0.45027231116984	0.214928876461948
1012	cg15419710	-0.662349279263379	0.0106959490449761
1013	cg00825734	-0.0580783091782104	0.753469933289378
1014	cg22421766	-0.216197800001331	0.260598464949615
1015	cg24576260	0.0505408886279726	0.723317087369702
1016	cg21203719	0.049594584575404	0.811926710984309
1017	cg24852892	0.430130584850992	0.25137701677508
1018	cg22225577	0.179502700581149	0.313191703102463
1019	cg10119342	-0.166332328008588	0.313557057267136
1020	cg06679168	0.31100443259901	0.114077835811815
1021	cg16995668	0.0329355328812452	0.882436012061664
1022	cg09870910	-0.280087148989219	0.242263020481909
1023	cg25151559	-0.0232085304703376	0.818977503956335
1024	cg20674014	0.191835699408097	0.207197696871174
1025	cg18224942	-0.0044812630622113	0.959431903642982
1026	cg15683497	0.0885479375691007	0.565230918696493
1027	cg20978193	-0.00679381362019019	0.943595413427236
1028	cg13681826	0.00260399421551471	0.984523343298169
1029	cg16380285	-1.14612694804077	0.00163068264594911
1030	cg15994839	-0.222327736242814	0.813950834611372
1031	cg21265287	-0.26347822251834	0.639307698788347
1032	cg02506501	-0.281338730635854	0.437098371120883
1033	cg14728174	-0.0299327577931921	0.861918209635813
1034	cg06818047	-0.019990461875843	0.80724471075959
1035	cg22161575	0.08621575121919	0.547683086993337
1036	cg03003335	0.0204851845940551	0.77485028810147
1037	cg01937247	0.00708106931696771	0.958953949535815
1038	cg01515136	0.00154296880356704	0.984751282876793
1039	cg17026072	0.2984841815587	0.7043301106082
1040	cg13452079	-0.236061475972574	0.494548611976309
1041	cg10093859	-0.157035435300877	0.605012332488042
1042	cg25106100	0.658081491346052	0.00382361203916825
1043	cg03001234	0.292856799189166	0.251430978091413
1044	cg27543922	0.530138672722559	0.414167990478785
1045	cg18163062	0.21592654853762	0.32188327426658
1046	cg14529643	-0.0544425864823111	0.673564136148196
1047	cg25021451	-0.504432961850674	0.185306594797855
1048	cg04584842	-0.149004428775748	0.627202477269229
1049	cg18538985	-0.364952527137793	0.18555215841993
1050	cg19414302	0.079601605986847	0.794925555903021
1051	cg22675767	-0.140267504663177	0.260082619463002
1052	cg06759632	0.471565117193537	0.162966813780754
1053	cg17405058	0.230436880996561	0.575026600061876
1054	cg17712416	0.0648668028569439	0.607558671998083
1055	cg25203980	-0.106758489134396	0.568330616198417
1056	cg02953397	-0.0598948378640651	0.689225291293118
1057	cg18565510	0.115661453698918	0.650021084852861
1058	cg27185793	0.0927291480191535	0.536285390773768
1059	cg09556527	0.120860559355773	0.399371186498637
1060	cg07181952	0.00928344890842929	0.951548430930293
1061	cg22346297	-0.0478859543878016	0.72932189861158
1062	cg23310884	-0.154385378693567	0.347733076923336
1063	cg26333156	0.0935139362047305	0.808581743616537
1064	cg00262415	-0.472014033861727	0.329523345019305
1065	cg27440283	-0.202083900838962	0.588524655269333
1066	cg00086266	0.135054154091312	0.771254551179627
1067	cg19323338	0.291315715913206	0.44864450709283
1068	cg24157952	0.473519687488586	0.265014737517262
1069	cg15042692	-0.0451598223386603	0.935807156431552
1070	cg07425625	0.514904492402685	0.444786761305008
1071	cg04840417	0.646081607284926	0.131685843867585
1072	cg16887862	-0.0699318510592806	0.869017234754501
1073	cg25201327	-0.660689327209642	0.386120954143851
1074	cg15868629	0.22539747115844	0.706061900076885
1075	cg27642349	-0.800756454962363	0.0917279243973433
1076	cg26214604	-0.22054322091276	0.580596933568793
1077	cg18224588	-0.643114801639927	0.300988304392176
1078	cg25536368	-0.702054857338094	0.310581266459091
1079	cg00903892	-0.593998581420833	0.199438878041129
1080	cg14488957	0.494225429520541	0.234981925245546
1081	cg06085743	0.0650081457254555	0.645195300649749
1082	cg05397202	0.158348172023668	0.469710858147177
1083	cg23931819	0.00343119609832931	0.981779206200462
1084	cg02506753	0.0538699867991667	0.827878590306803
1085	cg05362521	-0.0523201352653191	0.893089257056483
1086	cg05724097	0.0795421245285334	0.773246244736042
1087	cg26369180	-0.135142608039891	0.753806834084758
1088	cg19383909	-0.227334605441581	0.432750458934153
1089	cg26576041	-0.19374740239253	0.4416351746368
1090	cg11847126	-0.000772952309604724	0.997621159743633
1091	cg15736449	-0.0419583704720963	0.903231186132031
1092	cg23689441	-0.444742712338196	0.147805461921821
1093	cg17709975	-0.0437399887991411	0.891390988506546
1094	cg10435967	0.274711746692705	0.304445257642581
1095	cg16712243	-0.170722038871561	0.491942521984181
1096	cg08663263	-0.291446856618451	0.696783152308425
1097	cg07568471	-0.336272092140522	0.408230471472036
1098	cg26931466	-0.388937761215046	0.278748427402238
1099	cg26866277	0.0822077429285083	0.782198634503136
1100	cg09299774	0.0652250218824028	0.846604928041739
1101	cg10206052	0.102160668382416	0.682183644651149
1102	cg08939275	-0.185449354625621	0.5279026712232
1103	cg22665280	-0.261517356516385	0.472425781009276
1104	cg19585749	0.0651689599307843	0.71726715569923
1105	cg16527939	0.236250641146865	0.24667429600064
1106	cg04926200	-0.717873037511282	0.0908454689032839
1107	cg12609142	0.262035916549775	0.206128327458068
1108	cg22130030	0.0918518053549983	0.663601416848432
1109	cg09862283	0.348897266975061	0.213333563067703
1110	cg15901950	-0.081674439667181	0.807793849520526
1111	cg12046908	-0.711081975821084	0.127416172994246
1112	cg26831087	-0.11113290882723	0.581754792140769
1113	cg21197375	-0.0543244645998748	0.88733492294304
1114	cg20236831	-0.375948732224168	0.414716229765884
1115	cg13183628	-0.48665745436019	0.499545970532641
1116	cg06038049	-0.396918009888853	0.521852011856663
1117	cg17612270	1.26379792626191	0.042324160677706
1118	cg22397910	-0.227451468197629	0.727531149948626
1119	cg22125623	1.07577327247782	0.176922271763802
1120	cg19834486	0.142128231564729	0.771319882159361
1121	cg13649172	-0.225278496186258	0.346123194611718
1122	cg04232698	0.16459887435302	0.344614782810821
1123	cg16855244	-0.0291112084939855	0.849517833937358
1124	cg19827148	0.712250418459553	0.159505359071998
1125	cg05378358	-0.109220882655129	0.270397988099013
1126	cg06520508	-0.148161598455343	0.526106981976415
1127	cg17970390	-0.09314833916254	0.640705324531355
1128	cg05795376	-0.14603695073325	0.575206422712653
1129	cg05598010	-0.059441021560531	0.688165864698869
1130	cg16255279	0.186726248811459	0.703132604067112
1131	cg22622472	0.106199509308408	0.731764323609286
1132	cg16432326	0.0367757037734232	0.869619397390083
1133	cg07394827	-0.21066591502399	0.558935882105854
1134	cg02625725	-0.267281704249826	0.327386415785635
1135	cg06599206	0.160274439877326	0.559929502851538
1136	cg16590012	-0.011269590660542	0.687603033053741
1137	cg22857134	0.0669958445506194	0.302053021041944
1138	cg03833995	0.0263480061718889	0.907238579067817
1139	cg20705390	-0.0460419188774796	0.84291910593277
1140	cg04981007	-0.0233444136663585	0.884009618499685
1141	cg16430279	-0.0326134125445223	0.823115886953512
1142	cg15365642	-0.176175769314246	0.328986002264333
1143	cg24252805	-0.473901973821967	0.0518442390051536
1144	cg14890378	0.0535099406731669	0.821484465701188
1145	cg07346648	-0.137442973625844	0.48547393485977
1146	cg08037114	-0.103593880483383	0.626884356450905
1147	cg04910752	0.306286963994774	0.14791696032546
1148	cg13246026	0.0525121259617447	0.772713384916621
1149	cg21396988	-0.000751480217737958	0.997583199952171
1150	cg06802641	-0.0281231416419542	0.841389665358336
1151	cg03402404	-0.250619004257636	0.166420978871491
1152	cg10065209	0.30274638048857	0.0875345145915007
1153	cg08621441	-0.235264783779465	0.355899348954852
1154	cg18386618	0.606860577834288	0.0214649153610724
1155	cg06395167	-0.0797847274948283	0.72690975543737
1156	cg16174225	0.106870972969604	0.587146718545105
1157	cg00002593	0.195962753766591	0.194349015537737
1158	cg11808871	0.0887184348422337	0.708678867491039
1159	cg14911892	-0.0158389114668672	0.945784190117739
1160	cg08160862	-0.454923021259243	0.437696780098445
1161	cg26351554	-0.950294656387216	0.0034671532346378
1162	cg24399111	-0.351529201672745	0.652254566480377
1163	cg18024631	0.0609798765639116	0.872837185450146
1164	cg07313814	0.00945120307494263	0.980271494731966
1165	cg11339519	0.618690022428191	0.0376509482242216
1166	cg00542041	0.189710713170427	0.725520332766188
1167	cg16575694	0.179659073516514	0.359858197726886
1168	cg06646682	0.199984083843587	0.424084591261408
1169	cg12072393	-0.209306675901885	0.555452858799086
1170	cg13494355	-0.347533842418672	0.399333566831161
1171	cg22376366	0.75879883353163	0.167034317684283
1172	cg25203539	-0.918240568882676	0.0181180630289455
1173	cg19898526	-0.401622723708157	0.203964424241118
1174	cg06649390	-0.13639489867065	0.698433851138714
1175	cg17748182	-0.316426924484273	0.394100853226216
1176	cg03465880	-1.69701315069934	0.109156441358418
1177	cg15462203	0.0977219696425635	0.818212632374265
1178	cg10556264	-0.616226097566823	0.0210636937675352
1179	cg22709966	-0.0491763878266952	0.839104600506838
1180	cg15976416	0.084517554470188	0.602140390412585
1181	cg17838754	0.221184004675575	0.349499937168325
1182	cg09569143	0.132656147189536	0.5293624861397
1183	cg13932473	-0.0751491816769354	0.724361435916954
1184	cg04119843	0.356679269046711	0.362375903959558
1185	cg09236098	0.276619656334639	0.601211711153024
1186	cg05115545	-0.10800741648362	0.879467157872966
1187	cg10164137	-0.0527749048415828	0.892105043517074
1188	cg17873420	1.51264374602149	0.0226013848379872
1189	cg21679391	0.0387974475432953	0.309054865793237
1190	cg21118819	0.0335650910538131	0.512516796538831
1191	cg03722312	0.0125752295149411	0.885893203292473
1192	cg11414742	0.123136430792973	0.552527606747333
1193	cg15472728	0.227568550132521	0.282023320712456
1194	cg14270725	0.063909908915661	0.570549097262067
1195	cg15386434	0.142809250599104	0.10296250846367
1196	cg16006120	0.0937187824043723	0.288929862800422
1197	cg14793596	0.289110331072251	0.0937983120062735
1198	cg07284273	0.0781497415082202	0.579250619520455
1199	cg25063151	0.28315706488738	0.0630880291332751
1200	cg19436320	0.194583033042819	0.119201570718406
1201	cg00040588	0.213489953924352	0.0739081907679467
1202	cg10482508	0.243900753525239	0.0153778361229035
1203	cg22691336	-0.246767879399399	0.206554694586171
1204	cg27399052	-0.408031454459639	0.0400777973427626
1205	cg12478066	0.0501869486186097	0.810511916386376
1206	cg23036947	-0.227328455466309	0.208224163924063
1207	cg17132079	-0.00259590560665768	0.98499182286308
1208	cg03397519	0.132337163174297	0.436291315779589
1209	cg22273474	0.00352814183755222	0.971067831898041
1210	cg18550476	-0.0642233244552096	0.561394314529237
1211	cg00970622	0.00297496613702856	0.984708443356813
1212	cg01198994	0.231747052121745	0.388534484903912
1213	cg23973885	0.367917717009508	0.0863682460082749
1214	cg13393580	-0.413069966985514	0.0236690299323364
1215	cg26108719	0.00379043823784991	0.981625626282011
1216	cg13354934	0.0241900390751163	0.856700306487621
1217	cg20426768	-0.0353510357567241	0.837823071292853
1218	cg24153574	0.257105476250999	0.152208505581975
1219	cg23569098	-0.106124372643991	0.547645597444793
1220	cg21165029	-0.0481311083615483	0.817721873629969
1221	cg12915036	0.142912794291613	0.235789338988979
1222	cg03400623	0.063597281746864	0.662345279960241
1223	cg22109675	-0.122967623413546	0.371930994483568
1224	cg15492552	-0.051094511174916	0.752432612884924
1225	cg05572157	0.326524769804967	0.203341955505638
1226	cg18534079	-0.506418320823454	0.037943207865499
1227	cg00046914	-0.0764910914228682	0.561629735564893
1228	cg02416993	0.0346201321292747	0.774784403342469
1229	cg07726485	-0.153960799347293	0.497369204750994
1230	cg23377249	-0.107265837008869	0.607669086440297
1231	cg24356704	0.171764241924275	0.381368013427853
1232	cg27503832	-0.100891215603708	0.721594953475592
1233	cg22643873	-0.451755870780152	0.0300197386314563
1234	cg05397857	-0.00577085980827136	0.968296210440261
1235	cg05387269	-0.0433872306395846	0.646230972670956
1236	cg16342853	0.158140669424858	0.455038956623176
1237	cg14992101	0.383778619692578	0.114617572245832
1238	cg09996760	0.0153330940921295	0.96626226853688
1239	cg09864992	-0.346234007929483	0.354163920426171
1240	cg14094639	0.23401508403641	0.411024602953843
1241	cg06203720	0.0518129552060486	0.749208837691107
1242	cg01508988	-0.0391580887387605	0.860678767293351
1243	cg07395004	-0.389346019963778	0.33103857165404
1244	cg19871494	0.0219604039735387	0.937436130039951
1245	cg09741074	-0.190083725978213	0.639398609763162
1246	cg08433720	-0.765276185705308	0.081913623040135
1247	cg21513204	1.31836289001959	0.0112964667261183
1248	cg15604233	-0.293916678922622	0.500622407682856
1249	cg11915315	0.171020901957691	0.534884203471212
1250	cg20048602	0.0318895000778615	0.86636214343737
1251	cg20439722	0.103385305645214	0.7179161735087
1252	cg19823490	-0.421870706515014	0.194240616148393
1253	cg21478504	-0.00441675644971198	0.989793570910371
1254	cg04615596	0.391525289850292	0.424153713349644
1255	cg05364533	0.441408127386859	0.434790519100337
1256	cg15617543	-0.343346984688792	0.383645422830449
1257	cg18546249	-0.00132599623106805	0.996920122270737
1258	cg11552267	0.172523474747176	0.443710012255527
1259	cg05589276	-0.50811813399183	0.0606906986565157
1260	cg02144516	-0.0802420250214627	0.717640006735575
1261	cg20435334	-0.430954579075319	0.241900524557081
1262	cg26865478	-0.158102075131677	0.641085704175534
1263	cg16361266	0.282290275659736	0.387330326504022
1264	cg20434150	-0.215382171001937	0.502381103376808
1265	cg08253842	-0.256773787429459	0.412165047185782
1266	cg14224772	-0.417296360570986	0.239929007939023
1267	cg03322002	0.0932479670726576	0.822489346711685
1268	cg08109545	0.0179988937432163	0.892377437991375
1269	cg12033178	-0.117781949292159	0.723766377057538
1270	cg08158776	-0.02658399394089	0.930378620724895
1271	cg04880874	0.119262988313793	0.758730424549119
1272	cg15588177	0.48165134906036	0.38074607456857
1273	cg22232737	-0.577415843771248	0.151224132146057
1274	cg01006034	0.00381835408170202	0.98807269339871
1275	cg23621766	-0.00130213922526834	0.997781099180499
1276	cg06903451	0.264522173456444	0.465924103269755
1277	cg07284402	-0.0610217592292558	0.813580064927101
1278	cg03774228	-0.86387647241835	0.0138923249264196
1279	cg23209302	-0.662848172745153	0.0905483412798895
1280	cg01399319	-0.0360082431455262	0.933827760621374
1281	cg21264396	0.177478399876071	0.359364049932414
1282	cg19236733	0.403775952212074	0.218627876640385
1283	cg08647342	0.271916221887241	0.320658490482811
1284	cg18087716	0.108164774917289	0.59501298807191
1285	cg17014728	-0.0410156060274041	0.917381995615897
1286	cg04988279	0.205326319509219	0.138287062032346
1287	cg13323817	0.31673157306246	0.115227264545595
1288	cg22389936	0.240056844201878	0.445422814474067
1289	cg26303572	0.0366177719548902	0.934868877877973
1290	cg01648457	-0.32444965681791	0.354692629778658
1291	cg04481810	-0.0759081243997804	0.814044059970982
1292	cg11811184	-0.447627315541705	0.170858082543679
1293	cg24837149	0.142953477117682	0.248327359082544
1294	cg16278124	0.537369192525409	0.20571016995024
1295	cg06817090	0.570796782686473	0.357510753855446
1296	cg16573386	0.487281215738759	0.229561077769084
1297	cg17397377	0.010538349896101	0.952130423119961
1298	cg08470185	-0.0166097316107308	0.980408705507724
1299	cg13053783	0.370816185040339	0.561825991399124
1300	cg22961467	0.141536674573468	0.773419684423983
1301	cg15130241	-0.99582166649975	0.0802364159739152
1302	cg08791782	-0.488308714039594	0.392426161184721
1303	cg25842896	0.516757063741039	0.421856595626869
1304	cg00173405	-0.255072717679673	0.739275332979255
1305	cg03943717	0.0606897206945299	0.900147556092598
1306	cg23437836	0.473715503529337	0.316427948254089
1307	cg00968800	0.0626855579678602	0.78396093175013
1308	cg08163912	0.341745962114424	0.314966502192613
1309	cg09064061	0.0342007815405799	0.899843346543768
1310	cg04903146	-0.0938653855419757	0.612971404227384
1311	cg24399028	-0.374179878870991	0.32627882370056
1312	cg20383673	-0.333930588058162	0.39383213760945
1313	cg14795268	0.0920664302922742	0.44206158357787
1314	cg11431291	0.051632265901525	0.642701687487409
1315	cg21439539	0.481034770285652	0.506050345041824
1316	cg20275133	-0.383950404174828	0.25482893427914
1317	cg16728516	-0.292272092899506	0.61316184665827
1318	cg25769755	0.248850505263432	0.752155132065243
1319	cg11993086	0.43686674280782	0.333602623725581
1320	cg26509139	0.223544233865218	0.541720353511022
1321	cg08387662	0.0469887368338326	0.608534265953817
1322	cg05595602	-0.892848883382863	0.153233240542369
1323	cg25397779	-0.0870795819330972	0.870648748500186
1324	cg04230662	0.720443285608952	0.0464246949414189
1325	cg12525514	-0.112319431757805	0.429453783235508
1326	cg25939543	0.224593334341158	0.596178403736833
1327	cg16661858	-0.0336038998687275	0.824435751940722
1328	cg15863361	-0.119733685456778	0.715519874692118
1329	cg00009834	0.386562642818739	0.0791220443951821
1330	cg27295412	-0.280467018211299	0.330123434015552
1331	cg00294152	-0.180854785376586	0.109347865974166
1332	cg25228593	-0.0928728014585376	0.605540087019585
1333	cg23359932	0.402968626927606	0.303925821923722
1334	cg00060374	0.0835911354088045	0.31955626065585
1335	cg17507949	0.0103669046796032	0.934657343634192
1336	cg22827694	0.0379977946648778	0.84191675471811
1337	cg23894219	-0.0129271765049993	0.938790030413383
1338	cg15633699	0.0102141884745217	0.94586137354153
1339	cg10380643	0.130194288646359	0.474418976278188
1340	cg20598347	0.0516126635067483	0.69797410928474
1341	cg02668764	0.046834752582333	0.722712706848495
1342	cg15081886	-0.0577695643606018	0.736052773119594
1343	cg23537515	-0.0896853437125035	0.619175050054828
1344	cg12754273	-0.0847479880568257	0.585710248466208
1345	cg21281527	-0.0125166540256112	0.954068058607511
1346	cg15823872	0.0558320193802334	0.839357389919901
1347	cg24555071	0.174688800567956	0.489237713097534
1348	cg12286462	-0.340270866016427	0.215139377201204
1349	cg01721822	-0.372988562230774	0.211158073383366
1350	cg21285198	0.159852977610535	0.449492571905871
1351	cg00305774	0.0609273701832141	0.836282456391442
1352	cg22517356	0.0693159790055848	0.582789867118358
1353	cg17265051	0.0333600587430915	0.812025993648165
1354	cg23795938	0.133165600862784	0.451072837893979
1355	cg10156298	-0.0417533846305074	0.723622749831235
1356	cg09368716	-0.0777999396939186	0.506671972681501
1357	cg12208770	-0.206984220385034	0.18947572995937
1358	cg26863172	-0.0651636193124409	0.451191212959809
1359	cg13169132	-0.0936098442618318	0.195943561374963
1360	cg17142722	-0.612951866066865	0.155251064692477
1361	cg04897188	-0.383903936790004	0.144175367304277
1362	cg07010566	0.125259410354887	0.455438046165509
1363	cg14902621	0.4997804844808	0.0818544807128761
1364	cg26373274	-0.0566540618430967	0.786804859207873
1365	cg22351666	0.383644604315373	0.160888931217816
1366	cg05235651	0.0244359792366423	0.862755161848894
1367	cg04865726	-0.0291322034859277	0.785052034871188
1368	cg04384590	-0.265962375011642	0.349453435680472
1369	cg19071098	-0.178594935632968	0.391781735338256
1370	cg08123463	-0.0904310456764207	0.744966414601579
1371	cg16496742	-0.330877035590371	0.224824017921697
1372	cg26394870	-0.0409419667255165	0.59924412749667
1373	cg19270739	-0.0563794903287416	0.651338210222441
1374	cg21837069	-0.0808719437869235	0.649704581738267
1375	cg00702126	-0.0666036362939425	0.684949470400477
1376	cg14667273	0.0372009129120928	0.885857358710076
1377	cg27391934	-0.269160076905417	0.289522250821729
1378	cg07898743	-0.043937724353387	0.870890011004069
1379	cg20138749	-0.263569250390457	0.376495933486509
1380	cg16784215	-0.082958928146967	0.566614577643046
1381	cg07232890	0.000499393344022686	0.998352746273699
1382	cg08589721	-0.0279311469924349	0.915093344475325
1383	cg14271665	0.0510180236231704	0.90141751322031
1384	cg02896318	0.384499004216056	0.204619089379791
1385	cg25234611	-0.174236239088839	0.665678029871697
1386	cg09668627	0.112464367587866	0.363362813030982
1387	cg08161163	0.227924433067606	0.389866369706467
1388	cg26798702	-0.0972470538726516	0.653672115970501
1389	cg09843049	-0.239746882718309	0.170761352714695
1390	cg20255272	-0.103081405146811	0.315258584642459
1391	cg13897675	0.103234365270793	0.821776793404969
1392	cg09860601	0.17664687834821	0.435740857999748
1393	cg19639479	-0.0342136342448004	0.898472607071353
1394	cg09603935	0.681769807856034	0.103263359923802
1395	cg03116557	0.51322061691575	0.0181528947749094
1396	cg13570957	-0.049580633106967	0.86197866917782
1397	cg26795248	0.160891206017924	0.383081845457843
1398	cg25592215	-0.528493614505755	0.159355567467397
1399	cg08426733	0.0752937375094352	0.810333416595778
1400	cg08270205	0.105880248766019	0.817149329129246
1401	cg15099879	0.608257530598384	0.0664739334815363
1402	cg06786804	0.153546106640768	0.544968344316833
1403	cg24492273	-0.193317151458779	0.626094744430972
1404	cg00929633	-0.2035049114395	0.192608195086901
1405	cg21001441	0.381153864152004	0.0973227810045411
1406	cg12841328	0.0431537403688806	0.800299785841167
1407	cg11405695	0.177105556928021	0.382075121911767
1408	cg02136596	-0.0608426205890495	0.602078038599103
1409	cg20219069	-0.216092256950212	0.383992366580981
1410	cg00599812	0.189181769367334	0.251978781116145
1411	cg16669201	-0.50674907971499	0.0799484070391853
1412	cg00528453	-0.15438037311975	0.575258209330128
1413	cg23319365	-0.173160515600586	0.373617661120415
1414	cg27383362	0.00395568669179029	0.984153294059342
1415	cg26182712	-0.0989385454030543	0.483145165650144
1416	cg15310231	0.230963292922402	0.162489181311827
1417	cg27564386	-0.166268672484803	0.593831451970268
1418	cg26651722	-0.32721113726168	0.165028782562989
1419	cg01521567	-0.101271593453945	0.778988698909374
1420	cg03760226	-0.668492092020217	0.118979703086907
1421	cg20985028	-0.0349115699462961	0.863803181325952
1422	cg19682639	-0.197545497741369	0.362340699030099
1423	cg13388025	0.0197071707684448	0.917553851816379
1424	cg05894629	0.0937066804910092	0.771110258958871
1425	cg26226110	-0.164364173601262	0.114694350467603
1426	cg07280242	0.0678280999223072	0.65738170156139
1427	cg13798621	0.0616387900582281	0.731904666359745
1428	cg23016632	0.00826134195819419	0.962328042093631
1429	cg10972351	-0.147335801705622	0.538440316454363
1430	cg20951194	-0.078777427036968	0.766505836957344
1431	cg04107003	0.179815038290913	0.29985399327418
1432	cg24085570	-0.279335787827037	0.403315173674787
1433	cg17282836	0.0601464169783794	0.792782007985239
1434	cg10522845	-0.301817169471217	0.242470347080797
1435	cg24687970	-0.0358427228264254	0.851157684566286
1436	cg25101405	-0.0916569106598803	0.586149618292409
1437	cg04981940	-0.140469288359418	0.671524522783275
1438	cg17821649	-0.0981537097830921	0.761954840597798
1439	cg00391668	0.242359214468941	0.137835146214136
1440	cg19621710	0.209108851186145	0.296994892045748
1441	cg03742705	-0.709462820615118	0.00968054441408987
1442	cg16013630	-0.0919308642006344	0.63492556530376
1443	cg25210378	0.0421882265081346	0.888944626660452
1444	cg15875062	0.904600149564789	0.0812220680439349
1445	cg10228629	0.141953568203355	0.74090578662599
1446	cg12723840	0.0678330671139098	0.728602137247862
1447	cg06377929	-0.210386240764604	0.376222324757223
1448	cg07490279	-0.571348621091964	0.409657485770325
1449	cg10240778	-0.235413597081925	0.705690974135209
1450	cg03041700	0.0655174886537733	0.859135485937341
1451	cg12909536	-0.157361932960394	0.641614762198064
1452	cg12439834	-0.155236246485806	0.522400826702343
1453	cg02188411	0.00663140316249716	0.959915326116221
1454	cg07478007	0.205165342960881	0.274717278718264
1455	cg01768480	0.272569568613964	0.304337707581953
1456	cg23442023	-0.199571037736693	0.474051950800478
1457	cg22306974	-0.332136682955179	0.345140675407966
1458	cg26317581	-0.0897213335684176	0.505339106792891
1459	cg11735371	-0.225484741281122	0.467201952252781
1460	cg00695214	-0.176669830934433	0.651665275079225
1461	cg21094501	-0.255000142510006	0.442736149079063
1462	cg23735749	-0.253140184867195	0.504900033620683
1463	cg13352563	0.43749507343403	0.314691608430149
1464	cg13025553	-0.120976111600694	0.727802709603894
1465	cg20157693	-0.136120046040002	0.624171913208646
1466	cg18040125	-0.338558044737948	0.151225020330145
1467	cg15466030	0.00868247165591345	0.977776500555634
1468	cg05049094	-0.0322664309453272	0.925639174568905
1469	cg25628057	-0.125404686152377	0.76384080308419
1470	cg23236382	0.470064426563115	0.109075119357282
1471	cg24378791	-0.246834518601957	0.430647855474052
1472	cg26042514	0.288460772129375	0.60626324152493
1473	cg15688683	-0.0377893255748448	0.43376304055654
1474	cg13671768	0.267065979588097	0.36986847960401
1475	cg16494896	0.346618029190448	0.268329074585076
1476	cg06866635	-0.362635392163456	0.162338071795637
1477	cg18387631	0.183926014528728	0.64802636439064
1478	cg15101273	0.0260823428261304	0.926956829264271
1479	cg10108196	0.0850671405605549	0.290936365380785
1480	cg25201541	0.285252054583099	0.0804713428317403
1481	cg24296621	0.26451922766246	0.21525616828908
1482	cg21797898	0.0960154804625287	0.586242068421941
1483	cg09932694	0.0218577318309983	0.951473155443033
1484	cg17464271	0.785538332180375	0.139278149673289
1485	cg11103442	-0.179790833805064	0.767628261281676
1486	cg22225258	1.86573364028721	0.0129712351327735
1487	cg20230657	0.0826446317413285	0.870745301082642
1488	cg08376055	0.927102915827077	0.0678963955155527
1489	cg12648677	-1.35642826406353	0.0595430901584413
1490	cg06128920	0.615302515883754	0.316090737518111
1491	cg21124756	-1.74877361332736	0.00607917056008511
1492	cg24729577	-0.264886246967106	0.726521345822688
1493	cg14651254	0.267667913104262	0.376660150836168
1494	cg00088251	-0.0758115566891559	0.58640299495849
1495	cg11856308	0.0237277133108263	0.910778366625805
1496	cg05947649	0.153121716894664	0.573941086314229
1497	cg11794959	0.038773627528697	0.862906225206758
1498	cg20627546	-0.134026957794882	0.64028613450993
1499	cg11722969	0.583659378858229	0.0812697518405823
1500	cg19517490	-0.384204357806144	0.396088469519881
1501	cg13321900	0.102169190986188	0.727780322156322
1502	cg06793307	-0.0738007454961682	0.835698426278127
1503	cg15160081	-0.0394924142007085	0.96058230991127
1504	cg26536460	0.9155054400036	0.0224412094105724
1505	cg17498856	-0.14729157841785	0.856925957854352
1506	cg15481565	-0.51389431114129	0.100337520749573
1507	cg17848002	-0.104064232419517	0.767196156743483
1508	cg10712902	0.0192896075010357	0.947314276833198
1509	cg17590292	-0.918647687268678	0.027011506338888
1510	cg14395520	0.581228659894611	0.116612973053486
1511	cg15153800	-0.205467983484677	0.410505299725279
1512	cg06839383	-0.0294216093154656	0.484341719262256
1513	cg24466671	0.00827835093643246	0.979536299989742
1514	cg13893866	-0.160344453233737	0.327844016363732
1515	cg17445140	-0.087388768909781	0.86620869415127
1516	cg23933399	0.0166500887314852	0.981171642687603
1517	cg19768036	-0.748803732238487	0.0592254098655761
1518	cg07808701	-0.0660028552957669	0.880435040650095
1519	cg20675251	-0.671356620989606	0.00550240643208182
1520	cg17271658	-0.000174167004713822	0.999618317190298
1521	cg20681653	-0.0999906967704898	0.541020669055243
1522	cg23590525	-0.0172933675894671	0.938877568411286
1523	cg09259608	-0.00447468365046575	0.981150529840741
1524	cg20958600	0.149213338843852	0.588678916148951
1525	cg07835437	0.0157818270324231	0.964292141761516
1526	cg03041030	-0.0592005932009732	0.693354308672443
1527	cg12983196	0.430028474538394	0.168677363789692
1528	cg09151801	0.208061947424448	0.438417392014326
1529	cg11526073	0.162813643687743	0.519101048407991
1530	cg15844005	0.23675623356606	0.479483710853413
1531	cg27301475	-0.146197959696122	0.558767782728808
1532	cg06205922	0.608593511172463	0.225495002784182
1533	cg01536190	-0.507563360746066	0.147089235077375
1534	cg27047577	-0.628116932355004	0.31368126007511
1535	cg14434115	0.159649972003073	0.668772876139802
1536	cg11917182	-0.151228565807562	0.650679663015821
1537	cg02068237	-0.0384183124747495	0.913106740246315
1538	cg12270813	0.445625658026562	0.321761224020177
1539	cg03724010	-0.612504161543246	0.0990642587364041
1540	cg13804574	0.148833196408705	0.681267144442956
1541	cg16037137	-0.197954505824608	0.584838234136299
1542	cg12632610	-0.362502736610895	0.121630237179591
1543	cg16001723	-0.164693025762461	0.613692289338907
1544	cg13850380	0.188113613983439	0.101926349126494
1545	cg00813378	0.109116237888596	0.168846341642395
1546	cg08738570	0.104899102429721	0.163492940739656
1547	cg22497741	0.137922356127026	0.727297768775441
1548	cg16306898	0.209683973738354	0.630237899487112
1549	cg16601494	0.0685370253286852	0.859953362825423
1550	cg15487867	-0.603254196779456	0.127852098122726
1551	cg18430990	-0.10972967441906	0.450679419819987
1552	cg23244095	0.0132909035891684	0.901683203961493
1553	cg18114463	-0.445555393537768	0.202870233886299
1554	cg09612202	0.180301739775542	0.44784522868337
1555	cg26602477	-0.353997033180228	0.321547801335046
1556	cg11811409	-0.129666658295441	0.657592763137461
1557	cg26690297	0.433442414727556	0.217155893955264
1558	cg08757091	-0.394858595880295	0.267759306393427
1559	cg08464374	0.000305778195286835	0.9994983794094
1560	cg01802295	0.247198187248951	0.242737070387509
1561	cg13575252	0.485042206969519	0.172215601657673
1562	cg19619320	-0.155243027065017	0.690687864843079
1563	cg11964810	-0.105558190150837	0.378146488879948
1564	cg21173317	-0.456567482650709	0.41494095372791
1565	cg03392564	0.523515178525307	0.529614910919649
1566	cg00955674	-0.432263618504674	0.0878839829005272
1567	cg03941625	0.134132816979562	0.75382894505471
1568	cg10347735	-0.0153921958025535	0.968595239543903
1569	cg05426853	-0.0491576544909541	0.844537437378963
1570	cg07945460	-0.398044392949945	0.0167250389819054
1571	cg07381470	-0.144164397879301	0.50039388795477
1572	cg24470133	0.220460407963693	0.365007118204509
1573	cg00355315	-0.778385817450386	0.242825097100386
1574	cg04349378	0.260224006998839	0.319679902827066
1575	cg12734710	0.103504043503398	0.567020996053959
1576	cg01058717	-0.783223758159377	0.0835825044577071
1577	cg14194384	-0.210468906655161	0.445131144435791
1578	cg16305094	-0.105793610998663	0.69231157108921
1579	cg07229301	0.519012821479815	0.128013157076087
1580	cg18312113	0.122211035989172	0.591026452362977
1581	cg05888763	-0.136332098215533	0.698307019095128
1582	cg07426077	-0.396179174168958	0.265876756778926
1583	cg02871542	0.0626791252131795	0.734307073000938
1584	cg22373622	-0.126012686783217	0.704289904281307
1585	cg26908276	0.328789176043788	0.228597118893605
1586	cg06069740	0.437467180886405	0.258651479956694
1587	cg09073059	0.930862815505795	0.217396503263517
1588	cg16277776	-0.536822849629562	0.238287928929698
1589	cg07211239	-0.505891067062362	0.0544798028473994
1590	cg09517190	0.0585575143947453	0.756608141879374
1591	cg08140609	-0.165075862468651	0.411733850367005
1592	cg20140735	-0.0334178949079475	0.802697973128248
1593	cg24044259	-0.0969593083514358	0.686835294865818
1594	cg18368516	0.808517595577575	0.0789565181814436
1595	cg12062537	-0.172647557975058	0.730286336818661
1596	cg14442715	0.0449699543701108	0.890602494298972
1597	cg19910128	0.198431212262914	0.525360969938972
1598	cg06089960	-0.489305740435466	0.234970854218684
1599	cg17968925	0.287130713822581	0.349743381102783
1600	cg03710092	0.0162623683245068	0.964602227228492
1601	cg13431342	-0.283759223327638	0.415472634354547
1602	cg08947289	-0.164044918858503	0.561100359323921
1603	cg20490900	0.284390019810732	0.157503218068733
1604	cg04218845	0.0569642171564116	0.767380148689222
1605	cg00784654	-0.0465825329327967	0.835260145722982
1606	cg03309758	-0.0627632313933812	0.821965120198405
1607	cg12690016	-0.103893020014303	0.729925425100944
1608	cg25018209	0.520923682681731	0.281242014813489
1609	cg11586519	-0.137764034568711	0.573960528582708
1610	cg05181565	0.148681747369669	0.571220368543168
1611	cg23443459	0.194381445636552	0.77262886374471
1612	cg04637864	0.611852363470282	0.240593078624503
1613	cg19158176	-0.545084166199577	0.423226861881332
1614	cg13424097	0.241882874569471	0.518903735831179
1615	cg07090025	0.0731815481363302	0.868165205828027
1616	cg06199750	-0.126965972275029	0.787277572492757
1617	cg05433637	0.61742084665258	0.0501563385561178
1618	cg08271362	0.161095458906586	0.758696009658081
1619	cg03528848	0.133794746877885	0.724564132999223
1620	cg20755353	-0.277264848464149	0.451183774918168
1621	cg05338320	-0.0848414311139926	0.52920290040269
1622	cg16848272	-0.200841718559326	0.0308471347887821
1623	cg04652884	0.107343205766653	0.705098818691281
1624	cg14279825	0.200539289613852	0.361802115880418
1625	cg05702207	-0.0687620976487866	0.818484744296406
1626	cg00151676	0.233179308206197	0.61696100680425
1627	cg13316116	0.014287911745896	0.945723272334301
1628	cg05934012	0.438842987370413	0.24875325843979
1629	cg07479014	0.0364781535961288	0.905997595675688
1630	cg09126090	-0.080200444412604	0.589788045948549
1631	cg16358446	-0.597699811390875	0.296467309104369
1632	cg08289140	-0.517960556780005	0.313901686012119
1633	cg11521998	0.121609139089403	0.573664587925431
1634	cg09172260	0.149013137783748	0.490081406420661
1635	cg15158067	-0.010052296204464	0.959399265541728
1636	cg21240031	0.177922382838709	0.489298548252278
1637	cg26680206	-1.01516177213699	0.00511249908677314
1638	cg15034659	0.156272630446955	0.68521903334721
1639	cg11649182	-0.464782999019228	0.145763399826625
1640	cg25311963	-0.161130027727321	0.326937492962301
1641	cg07147033	-0.0465283277313727	0.561153145753747
1642	cg13897348	0.109524861373217	0.249208049302337
1643	cg19246761	0.0746480162419958	0.584525775494371
1644	cg01229567	-0.027021598259506	0.838708003375806
1645	cg15817635	-0.148487666400232	0.497155102920807
1646	cg15652741	-0.373371667488498	0.222805741468114
1647	cg10705488	0.183637222855116	0.818730060760635
1648	cg11140595	-0.558803525598838	0.387171909084181
1649	cg06761793	-0.282214938739327	0.731205706433289
1650	cg18123911	-0.423153334510455	0.561876790545338
1651	cg17271960	0.0932389068516804	0.895984514050509
1652	cg25004270	-0.616280054566177	0.0144051680928153
1653	cg25880288	0.764928958706766	0.115128373100626
1654	cg08912129	-0.624060065718075	0.383644254051794
1655	cg25164153	-0.377117529561785	0.48729476377583
1656	cg26169249	-0.799899476166214	0.328211625222282
1657	cg07807975	-0.395505382349703	0.470364283408396
1658	cg25010770	0.312963729147889	0.542760326571756
1659	cg10756715	-0.363647752788375	0.328730390984472
1660	cg05941212	-0.055058823976941	0.809187821805296
1661	cg13947830	0.0237915598334763	0.911086158175348
1662	cg26295592	0.0777462360829356	0.748469954730284
1663	cg00781053	0.615939250618208	0.112529023985092
1664	cg23605175	0.658355138191827	0.0970354976207971
1665	cg15369276	0.235798518504879	0.515197182098714
1666	cg25459752	0.166167852835196	0.585819844978545
1667	cg15558634	0.626594597488497	0.289580656893773
1668	cg10970349	-0.0431315099926414	0.178006911925401
1669	cg15323084	0.204159339089546	0.331001500147146
1670	cg19165249	0.299382488704665	0.381043729005178
1671	cg09082814	-0.215195201523309	0.496034954857587
1672	cg23957653	-0.0987617190705048	0.39927055870737
1673	cg09061216	0.348780363071918	0.246385024158164
1674	cg03975652	0.349957864997011	0.108165265105029
1675	cg25500853	0.247918905294362	0.526365889344795
1676	cg04292080	-0.562278875064689	0.0325736402688453
1677	cg17456675	0.155137960733769	0.632710210992103
1678	cg24090393	0.072423838212247	0.841607732398705
1679	cg02492207	0.019193543395814	0.93424853627387
1680	cg10994397	0.159426029413224	0.67743486204244
1681	cg22689324	0.25284867680345	0.132436282654251
1682	cg06002660	-0.0146193573319263	0.942851806213026
1683	cg25900627	0.0426337795597606	0.860166944449987
1684	cg04854189	0.252972570071294	0.236394516623047
1685	cg06912282	0.0768112300260053	0.684708262648337
1686	cg06080300	0.0693715831646378	0.656809856211912
1687	cg09159050	-0.229877980478909	0.308307419334339
1688	cg21129534	-0.0415878189178067	0.882433164915234
1689	cg00078456	0.0772798921601805	0.380726567280109
1690	cg18852096	0.0916996663945809	0.359078696129816
1691	cg05642789	0.0464853136736393	0.564744393632647
1692	cg01621974	0.00413283779720192	0.964660379203092
1693	cg17122213	0.0577473022982066	0.396759082912851
1694	cg03427058	0.0536916484786008	0.490808304387564
1695	cg23430652	0.147128026088017	0.214367560673331
1696	cg00297832	-0.0110975382586461	0.899695978114307
1697	cg24368383	-0.14765866267469	0.700095151106178
1698	cg04882394	-0.34488571490632	0.23947965249521
1699	cg24535439	0.0252084437937111	0.905319316221579
1700	cg00262621	-0.0773848519033268	0.663690971401409
1701	cg08231710	-0.167083644802009	0.28137340213432
1702	cg06943420	0.0038272507078667	0.983135856230222
1703	cg11648594	0.0517205506116487	0.790126361924803
1704	cg26740494	-0.0447140984556919	0.728249156883396
1705	cg05834878	-0.0439443811377529	0.845095713606931
1706	cg26976576	-0.191406910776607	0.503124311097993
1707	cg05419999	0.436901810339922	0.169434285604419
1708	cg11798909	0.0348397004125545	0.874124153710605
1709	cg27541892	0.0146895716657183	0.759583871815911
1710	cg21921584	-0.0682197655911479	0.837562276379917
1711	cg26660744	-0.210756991434783	0.552211749537306
1712	cg10124011	0.0889681982127945	0.703386555279937
1713	cg00595856	0.208403782457788	0.566733141185904
1714	cg23252997	0.193877282519819	0.525594353218956
1715	cg03484489	-0.0512647179171706	0.807292745419868
1716	cg16673286	0.0253373776683839	0.553638945078588
1717	cg03388431	0.0127085562928172	0.969556019519638
1718	cg17450090	-0.108994732835421	0.246903239005609
1719	cg03939105	-0.0437592437816622	0.717116335049219
1720	cg15126211	0.327656152412087	0.625891339185821
1721	cg00998168	1.11842618477859	0.0709089636025941
1722	cg18282011	0.502157639991114	0.329122101746295
1723	cg21149807	-0.927914296455253	0.129441346617325
1724	cg09283376	1.03531103556807	0.0190646227291833
1725	cg20155988	1.04341240069202	0.0791653591591827
1726	cg26562592	1.18104680894703	0.0582285742100564
1727	cg08864381	-0.492603751876577	0.561080613599779
1728	cg03017195	0.0901347865573569	0.855083898599265
1729	cg15830572	-0.174185087839684	0.597637256004488
1730	cg06848468	0.264476993832828	0.332073330734211
1731	cg20255817	-1.139463227857	0.190585809462935
1732	cg22082145	-0.322063207598809	0.545127026710533
1733	cg07601058	-0.841678054505982	0.0559935482215735
1734	cg23210533	0.373326112692795	0.277447409138056
1735	cg11809915	-0.0492617998029019	0.438556520046525
1736	cg04105726	0.780223451129609	0.0580397385154387
1737	cg17869988	-0.175232114080874	0.658597478111829
1738	cg03718254	-0.158001328580952	0.792673241647095
1739	cg20106035	-0.105149460863635	0.825146008848464
1740	cg14626671	0.121310194567135	0.803833987926076
1741	cg19382808	0.0254662016369264	0.949808714128951
1742	cg11530028	0.0803838296351317	0.747121897440741
1743	cg03972505	0.116408180832494	0.688860161290328
1744	cg06528340	0.268423645211928	0.362372984956939
1745	cg13077472	-0.229707962843373	0.500361354845727
1746	cg17939059	0.35974578446596	0.330033764789999
1747	cg18288914	-0.772424791593924	0.0451586054817959
1748	cg03548463	0.0216738287882905	0.954215405765786
1749	cg09330116	0.462961642407794	0.213695833724192
1750	cg00400654	0.12933548375962	0.640287604337749
1751	cg04272838	-0.63136623504151	0.210792813676174
1752	cg02915803	-0.182977946576133	0.406421196069527
1753	cg26932054	0.0700380451291998	0.799776022175138
1754	cg16990083	1.13071398732317	0.00223222323215805
1755	cg12655137	-0.062667706397843	0.406059056502958
1756	cg20251225	-0.0688953614089769	0.368148784406652
1757	cg20429981	-0.112991189697357	0.476624097202691
1758	cg01189072	-0.00594104850235079	0.967566302361712
1759	cg11588584	-0.522916666859835	0.0709656519386694
1760	cg09825670	1.21233359922727	0.00548807098736927
1761	cg15079481	-0.125705747332532	0.455892688843466
1762	cg20462449	0.116181120577543	0.62541199299996
1763	cg21106418	-0.0200224439764023	0.887013432266329
1764	cg10065215	0.0982671745274997	0.877421572477541
1765	cg12042834	0.324121680886543	0.396289319693961
1766	cg14976190	0.158144407763419	0.530397667853903
1767	cg12135548	0.233495880646492	0.0450880034126037
1768	cg12100965	0.729797802030711	0.23685909526521
1769	cg25414858	-0.664994071875237	0.109191137531418
1770	cg05972376	-0.0231733282902345	0.806427413464882
1771	cg19018051	0.0195039385015572	0.905586449872846
1772	cg13440958	-0.131727096369128	0.365814544052928
1773	cg26114076	0.499280910719777	0.0906779068713479
1774	cg23231093	0.218298842189644	0.252431771881344
1775	cg04437922	0.110013492836128	0.562142073590063
1776	cg24688574	-0.244164753142338	0.399469043342017
1777	cg00341415	-0.182931741912113	0.481338177214939
1778	cg06750152	-0.13374243730838	0.606808105215244
1779	cg10626236	0.0837339140977395	0.674378716804926
1780	cg27169263	-0.479345663389379	0.372456252521833
1781	cg12437380	-1.13666850924837	0.000860130270357926
1782	cg21932190	0.415772115461609	0.0833560955217084
1783	cg12398752	-0.0110828804901248	0.969199557503544
1784	cg05364761	-0.302745537313961	0.438543694868353
1785	cg15942579	0.0808409946466882	0.656478004938022
1786	cg00853237	0.449269540199779	0.132625463288578
1787	cg27047637	0.128154229708201	0.707259334193543
1788	cg12048375	0.031620698258944	0.915433949310774
1789	cg25189483	0.457362914280348	0.242772447348928
1790	cg24933755	-0.478190104469798	0.152371052474868
1791	cg11851198	0.119131469681178	0.578321758759571
1792	cg23611477	0.0386342784021751	0.235715997277634
1793	cg10628909	0.41664732312789	0.240516157122699
1794	cg20871579	0.611456891835471	0.0173262962061062
1795	cg21906539	-0.0459152788820173	0.78346639929788
1796	cg16248785	0.39231706475027	0.498161420317835
1797	cg25558285	0.188710070392613	0.679525738050797
1798	cg00062592	0.0192233009338294	0.967732183490116
1799	cg11198222	-0.604465074035842	0.363704049971279
1800	cg00669623	0.0252397421862224	0.959683863193402
1801	cg25253065	0.517015329205569	0.205559438398085
1802	cg03009233	0.147836607398316	0.697389613494741
1803	cg04243582	0.916395213253211	0.0656605607458479
1804	cg15176125	-0.062174495647776	0.779515010963989
1805	cg09353726	-0.114185887817159	0.594208249526233
1806	cg11572942	-0.321775470623695	0.141493968118657
1807	cg14164956	0.317965893065503	0.266789872851301
1808	cg12833102	0.264597562612272	0.266021200296762
1809	cg13441524	-0.00248460526503242	0.960902711013262
1810	cg01677809	0.0294554259012204	0.901521683961773
1811	cg14054781	0.0464245903679453	0.871504228051255
1812	cg11987751	0.123292349365119	0.593932129873325
1813	cg10162318	-0.358011044541065	0.155208402327911
1814	cg07808326	-0.0819964092326388	0.813982733037631
1815	cg16324669	-0.521354250908114	0.138513533222753
1816	cg12213037	0.0639583352495467	0.00698695144138548
1817	cg20620652	-0.0250270179092786	0.913014645306982
1818	cg02332863	0.111494331272931	0.778140732004145
1819	cg25887748	0.0427906116398549	0.890034329122876
1820	cg04087434	-0.0159095224842269	0.974524792135398
1821	cg13866156	0.17368945287983	0.593575152099527
1822	cg17456545	-0.202026691024636	0.413377016606086
1823	cg02934509	0.131321942857642	0.737318271899171
1824	cg27391816	0.0938145934843682	0.269789996545216
1825	cg16990280	-0.291963574457421	0.0112843125583071
1826	cg20597714	-0.426877279931021	0.420649838545779
1827	cg23983334	1.2863198400064	0.0187689229975737
1828	cg22824366	0.0501170864052343	0.851771200776659
1829	cg22464455	0.00424573549443176	0.991326066023474
1830	cg13849007	-0.964076298320873	0.0567590593285358
1831	cg25394461	0.0382402550308148	0.897974127871146
1832	cg04789860	0.398095374075152	0.283613686617991
1833	cg17990871	-0.290998690531059	0.336510724117688
1834	cg01512113	-0.118983608947191	0.552641981768395
1835	cg10515720	0.456097986844391	0.0691868876627122
1836	cg20999797	-0.546815849874132	0.143000120523269
1837	cg14018698	-0.312083347633437	0.249857151680028
1838	cg18763089	-0.177908886523139	0.576612842622842
1839	cg14027380	-0.317165309289897	0.152833177126563
1840	cg11163532	-0.0213143110545008	0.957312598630564
1841	cg03386811	-0.0879798435682677	0.829466844784383
1842	cg22707691	-0.00374283673075142	0.99337311817879
1843	cg10317445	0.678818197566669	0.209830448857115
1844	cg21580588	-0.370983627234084	0.510289729671394
1845	cg15260978	0.0795418632310243	0.806908845428837
1846	cg12406875	-0.353207343812555	0.311024029434956
1847	cg05983502	-0.15297978019849	0.67407958760074
1848	cg17282211	0.169637084957421	0.679143127635971
1849	cg27433479	0.168510493725649	0.325353398094966
1850	cg26342907	-0.00941617404328499	0.984656304746746
1851	cg11725331	0.319987667406477	0.269223532081531
1852	cg07015961	0.273597400040125	0.368250485222888
1853	cg10543797	0.1630093423897	0.554019455722418
1854	cg18947110	0.448331196655636	0.268722693253448
1855	cg09233730	-0.032456690140469	0.935472289893239
1856	cg15688635	-0.750936448650102	0.0702089180398098
1857	cg17010445	-0.151306309750477	0.591681399615568
1858	cg09185911	-0.295067192397241	0.0938324733447001
1859	cg25031205	0.448426745161798	0.303286143097707
1860	cg15578948	-0.00924619234923835	0.986287649908109
1861	cg04439557	0.496176976275842	0.0142821148268119
1862	cg08122070	-0.0891362375404416	0.510566634737178
1863	cg05152432	0.127577759074781	0.724024867634895
1864	cg07328316	-0.0199882839007227	0.872838755560456
1865	cg22906442	-0.140230935141566	0.220377538302513
1866	cg08937102	-0.0571530276760556	0.669539031535799
1867	cg15274273	0.0453822246793755	0.712651141278419
1868	cg11296110	-0.370194402191424	0.0305953738571812
1869	cg03606098	-0.119709339908843	0.286685225346248
1870	cg18956079	-0.394125647903432	0.076901701005286
1871	cg12552303	0.222190958001799	0.383522016382702
1872	cg00423114	-0.402364576893788	0.271315455414307
1873	cg21692735	0.190676958701416	0.746405333945835
1874	cg23159992	-0.47332327206092	0.195387711292114
1875	cg14778560	-0.391416568486154	0.139791424818304
1876	cg15851414	-0.18626465365127	0.465670052707617
1877	cg15824543	-0.321253184009933	0.141825010170999
1878	cg00992048	0.140366414348514	0.457183957600841
1879	cg00343906	0.0444275558506031	0.72333714605013
1880	cg27605903	-0.368038723516236	0.267935535360343
1881	cg13185289	-0.513871129013584	0.0238470324165497
1882	cg09182189	-0.149058065083577	0.419314350514933
1883	cg17157064	-0.584860983306053	0.154739086218751
1884	cg04407228	0.189067402134842	0.549319060621549
1885	cg10388316	0.550042497482458	0.49363480771091
1886	cg00997530	-0.160299117745615	0.812665655258731
1887	cg00328972	-0.187544285206774	0.774506430013508
1888	cg26421735	0.898122860904489	0.0359509900306836
1889	cg12523155	-0.0762036410738429	0.912451667558624
1890	cg18509696	-0.782117044568535	0.259794582441329
1891	cg25877525	-1.26225804342783	0.0423971748745343
1892	cg20045172	0.548890635591991	0.490774842902339
1893	cg25852883	-0.32391242428496	0.651504634931868
1894	cg09932345	0.332315185565719	0.577324671911929
1895	cg02297801	0.144341208254875	0.615308798967213
1896	cg02400530	-0.165702579847366	0.474479606927389
1897	cg17266431	-0.178059138133812	0.304699850371058
1898	cg19114248	0.0119055515335751	0.947587273124728
1899	cg05627004	0.0875488114283374	0.769344766465292
1900	cg11837076	0.0470302425652907	0.771969451840325
1901	cg18591364	-0.0993605921635829	0.590194466499658
1902	cg04157786	-0.0916332163745028	0.347363924700111
1903	cg14958032	-0.186786833069026	0.0781310185843861
1904	cg00735586	-0.123803034938209	0.45265877586045
1905	cg23678594	-0.179397598838231	0.647880283545307
1906	cg22877644	0.0630426328953499	0.791731271776063
1907	cg23834034	0.037033864383215	0.890151473423868
1908	cg19083977	-0.139562587971296	0.486615888223047
1909	cg02769781	0.154962946884028	0.139332490830323
1910	cg24163210	0.0919745807638274	0.416648011415425
1911	cg00558749	0.198324117433244	0.135824649770023
1912	cg13461447	0.116937876164134	0.228845625751587
1913	cg10207218	0.149758489111187	0.249759359628032
1914	cg05262191	0.0166017581523315	0.950300022071065
1915	cg22376730	0.0870013349342766	0.717929695867161
1916	cg04902899	0.00436686532494673	0.993285085044118
1917	cg26568075	-0.288867016892666	0.269919637800761
1918	cg25314445	0.388115779197552	0.217240601921409
1919	cg12076692	-0.513045912198927	0.147466045115944
1920	cg13336641	-0.0935950747521613	0.774888190037315
1921	cg16418734	-0.0172092518804684	0.956608202602989
1922	cg06843553	-0.28928863307586	0.389866728903155
1923	cg09292319	0.0523406559763285	0.877124833909299
1924	cg25666010	-0.837286499717554	0.00340952450373773
1925	cg25075731	-0.230836216872047	0.310845702863963
1926	cg25069266	0.106038668971988	0.763551130343372
1927	cg05722993	-0.860570932810122	0.0206642419899417
1928	cg08820807	-0.0953527324521235	0.398664142493732
1929	cg15523212	-0.115161455187633	0.567628374197837
1930	cg03335128	-0.0451220699008225	0.859852711177489
1931	cg26793463	0.33878057163387	0.379198488094687
1932	cg21422400	0.166146373203035	0.437994579903281
1933	cg25480982	0.297391685646087	0.385630464700257
1934	cg20732440	0.514906189197059	0.109935620782863
1935	cg04397839	-0.30645947842197	0.51038574425626
1936	cg01729401	0.0671742450770704	0.824893560438408
1937	cg02948693	-0.166954517606321	0.378541965174642
1938	cg27021587	-0.0936379477741115	0.674104037294968
1939	cg05368896	0.169640386851053	0.103805169353558
1940	cg12134886	0.0878598731818907	0.712748684300298
1941	cg01205154	0.232989043960798	0.0945430957759531
1942	cg09535746	-0.0171354826718207	0.895257169262226
1943	cg07068709	-0.166415910951089	0.40774277854222
1944	cg04260676	-0.491337268811351	0.0296440783330704
1945	cg05813612	-0.35827978933975	0.260470798715102
1946	cg18821813	0.0701617808044369	0.834872972607307
1947	cg14527423	-0.209060925908819	0.302725897480288
1948	cg16677144	-0.00145604656584021	0.992741459793716
1949	cg14953148	-0.173041549211242	0.440370052331501
1950	cg12072340	0.163024537087818	0.488718854236478
1951	cg18162783	-0.00403657096408452	0.979726016496996
1952	cg04994975	0.493776958380833	0.00614118958426567
1953	cg26147268	0.369881381568134	0.088380540739946
1954	cg05925326	0.164967739378762	0.54954226823241
1955	cg25599619	0.277433099546008	0.0172373073519716
1956	cg16645714	-0.0840395392949705	0.122785123013187
1957	cg09503310	0.374494544964638	0.0912200134405349
1958	cg03445765	0.453125962379006	0.237636065459575
1959	cg11836949	0.15820426752116	0.083990248850999
1960	cg07432009	-0.166524724018412	0.506834910246338
1961	cg03043696	0.351071120749164	0.120322746298731
1962	cg19340909	-0.0315097241104662	0.927605850536901
1963	cg03716942	0.193530794920077	0.654800277331342
1964	cg06196161	0.0282572472969051	0.928119166337863
1965	cg23891190	-0.23801784126129	0.393832795162248
1966	cg01821754	0.0136249246839983	0.950229221464435
1967	cg17483139	0.306096577984891	0.570813971142823
1968	cg04266169	-0.133570930500311	0.397358841163518
1969	cg15827003	-0.385438619523397	0.0572877779844697
1970	cg18854735	0.408534009177643	0.133687378315447
1971	cg12150066	0.149882957533792	0.799114927783156
1972	cg23982607	0.229874491122508	0.0159003023625508
1973	cg07380540	0.127030154723059	0.439525996627589
1974	cg16652392	-0.0613815383690791	0.71298616113232
1975	cg26492771	0.10132571886273	0.564039591173086
1976	cg21776599	-0.135054828836239	0.308478626151512
1977	cg24706992	0.0126117199320862	0.957209015687559
1978	cg23936745	0.387428948373664	0.211083450942793
1979	cg00007800	0.125232418622056	0.591605655695658
1980	cg09809474	0.319280746621745	0.405213914991912
1981	cg13918235	0.653585226258731	0.2004886531343
1982	cg16384593	-0.0602891665990444	0.792669417355641
1983	cg00309462	0.515347123555164	0.264595177610876
1984	cg23688809	-0.0554574772289619	0.909034071158824
1985	cg16926213	-0.306835708521585	0.00722030826695727
1986	cg09628503	-0.26940700977359	0.291470039013427
1987	cg22850508	0.437729510681677	0.186208681989379
1988	cg15102821	0.0467218529972723	0.81425074660015
1989	cg01755342	0.181774332862637	0.34531938156732
1990	cg15819352	0.0671349890359858	0.67873502116369
1991	cg06443644	0.167410342161024	0.251905189592282
1992	cg11549166	0.36844237244039	0.104515178052513
1993	cg22364929	0.0464635436032738	0.771347852198375
1994	cg05132306	0.269984557024008	0.0547103047985775
1995	cg15715333	0.242122182138952	0.198490011140001
1996	cg17434257	-0.134319643882191	0.716079154569052
1997	cg24188976	-0.0184986524377138	0.930536196253075
1998	cg12642568	0.0240173984801208	0.899165365364087
1999	cg05995891	-0.641382092488144	0.0445151826758453
[truncated: 839,368 more rows]
